# Supplementary material for: Ag2O-promoted ring-opening reactions of cyclopropenones with oximes
Source: Royal Society of Chemistry journal article supplement (doi:10.1039/d0ob00601g), 2020-01-01

# Supporting Information

## **Ag<sub>2</sub>O-promoted ring-opening reactions of cyclopropenones with oximes**

Ye-Fei Yang, Xiao-Bo Huang, Wen-Xia Gao, Yun-Bing Zhou,\* Miao-Chang Liu\*  
and Hua-Yue Wu

College of Chemistry and Materials Engineering, Wenzhou University, Wenzhou  
325035, People's Republic of China. E-mail: zyb@wzu.edu.cn; mcl@wzu.edu.cn

### Table of contents

|                                                                            |            |
|----------------------------------------------------------------------------|------------|
| <b>1. General information.....</b>                                         | <b>S2</b>  |
| <b>2. General experimental procedures.....</b>                             | <b>S2</b>  |
| <b>3. Unsuccessful further transformations of the product<br/>3aa.....</b> | <b>S3</b>  |
| <b>4. Crystal data and structure refinement of<br/>products.....</b>       | <b>S4</b>  |
| <b>5. Characterization of products in<br/>details.....</b>                 | <b>S6</b>  |
| <b>6. <sup>1</sup>H and <sup>13</sup>C of<br/>products.....</b>            | <b>S18</b> |

## General information

All reagents and solvents were purchased from energy company, Innochem Company and used without further purification. Unless otherwise stated, all experiments were conducted in a Schlenk tube under N<sub>2</sub> atmosphere. Reactions were monitored by TLC or GC-MS analysis. Flash column chromatography was performed over silica gel (300-400 mesh). <sup>1</sup>H NMR (400 MHz) or <sup>1</sup>H NMR (500 MHz) and <sup>13</sup>C NMR (125 MHz) spectra were recorded in CDCl<sub>3</sub> or DMSO solutions using a Burker AVANCE 500 and 400 spectrometer. Chemical shifts were reported in ppm. <sup>1</sup>H NMR spectra were referenced to CDCl<sub>3</sub> (7.26 ppm) or DMSO-*d*<sub>6</sub> (2.50 ppm), and <sup>13</sup>C-NMR spectra were referenced to CDCl<sub>3</sub> (77.0 ppm) or DMSO-*d*<sub>6</sub> (39.5 ppm). High-resolution mass spectra were recorded on an ESI-Q-TOF mass spectrometer.

Unless otherwise noted, all reagents and solvents were obtained commercially and used without further purification. The 4-oxaspiro[2.4]hepta-1,6-dien-5-ones(2a')<sup>[1]</sup> were prepared according to corresponding literature procedures.

### Reference:

1 O. Körner, R. Gleiter and F. Rominger, *Synthesis*, 2009, 3259.

## General experimental procedures

A 10 mL Schlenk tube equipped with a stir bar was charged with aryl oxime (0.15 mmol), 2,3-diphenylcycloprop-2enone (0.45 mmol), Ag<sub>2</sub>O (0.15 mmol), and 3 mL cyclohexane. The tube was fitted with a rubber septum, then the septum was replaced by a Teflon screwcap. The reaction mixture was stirred at 80 °C for 18 h. After cooling down, the reaction mixture was diluted with 2 mL of ethyl ether, filtered through a pad of silica gel, followed by washing the pad of the silica gel with the same solvent (20 mL), concentrated under reduced pressure. The residue was then purified by flash chromatography on silica gel to provide the corresponding product.

## Unsuccessful further transformations of the product 3aa

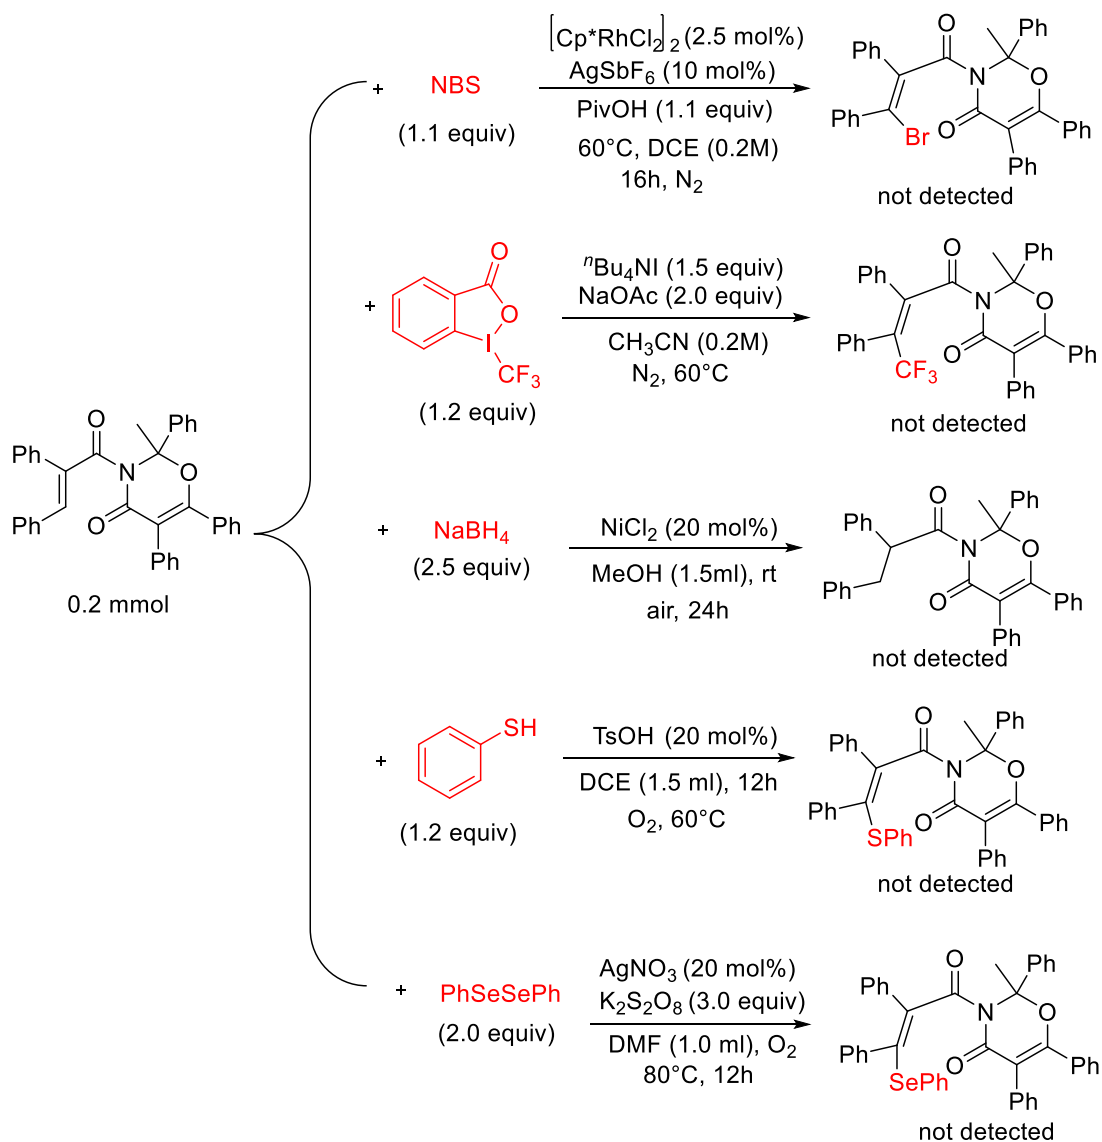

Unfortunately, most of the efforts made in further transformations of the products failed.

## Crystal data and structure refinement of products

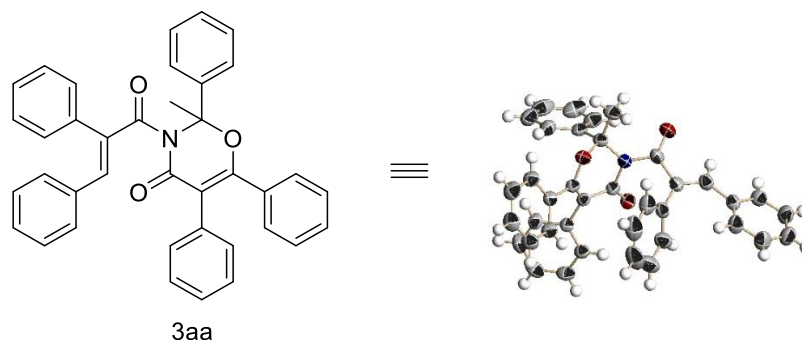

|                                   |                                                                                                                                                                            |
|-----------------------------------|----------------------------------------------------------------------------------------------------------------------------------------------------------------------------|
| CCDC                              | 1917041                                                                                                                                                                    |
| Empirical formula                 | C <sub>38</sub> H <sub>29</sub> N O <sub>3</sub>                                                                                                                           |
| Formula weight                    | 547.62                                                                                                                                                                     |
| Temperature                       | 296(2) K                                                                                                                                                                   |
| Wavelength                        | 0.71073 Å                                                                                                                                                                  |
| Crystal system                    | Triclinic                                                                                                                                                                  |
| Space group                       | P -1                                                                                                                                                                       |
| Unit cell dimensions              | a = 9.8324(3) Å                      a = 103.2290(10)°.<br>b = 10.2354(3) Å                    b = 97.7420(10)°.<br>c = 15.6234(5) Å                    g = 105.1910(10)°. |
| Volume                            | 1445.05(8) Å <sup>3</sup>                                                                                                                                                  |
| Z                                 | 2                                                                                                                                                                          |
| Density (calculated)              | 1.259 Mg/m <sup>3</sup>                                                                                                                                                    |
| Absorption coefficient            | 0.079 mm <sup>-1</sup>                                                                                                                                                     |
| F(000)                            | 576                                                                                                                                                                        |
| Crystal size                      | 0.20 x 0.17 x 0.13 mm <sup>3</sup>                                                                                                                                         |
| Theta range for data collection   | 1.369 to 25.999°                                                                                                                                                           |
| Index ranges                      | -11<=h<=12, -12<=k<=12, -19<=l<=19                                                                                                                                         |
| Reflections collected             | 25719                                                                                                                                                                      |
| Independent reflections           | 5643 [R(int) = 0.0393]                                                                                                                                                     |
| Completeness to theta = 25.242°   | 99.4 %                                                                                                                                                                     |
| Absorption correction             | Semi-empirical from equivalents                                                                                                                                            |
| Max. and min. transmission        | 0.7456 and 0.7096                                                                                                                                                          |
| Refinement method                 | Full-matrix least-squares on F <sup>2</sup>                                                                                                                                |
| Data / restraints / parameters    | 5643 / 0 / 381                                                                                                                                                             |
| Goodness-of-fit on F <sup>2</sup> | 1.044                                                                                                                                                                      |
| Final R indices [I>2sigma(I)]     | R1 = 0.0410, wR2 = 0.0995                                                                                                                                                  |
| R indices (all data)              | R1 = 0.0554, wR2 = 0.1110                                                                                                                                                  |
| Extinction coefficient            | 0.052(5)                                                                                                                                                                   |
| Largest diff. peak and hole       | 0.146 and -0.164 e.Å <sup>-3</sup>                                                                                                                                         |

The HRMS shows an  $m/z$  peak of 549.2273, which is in good agreement with that of  $d_1$ -3aa

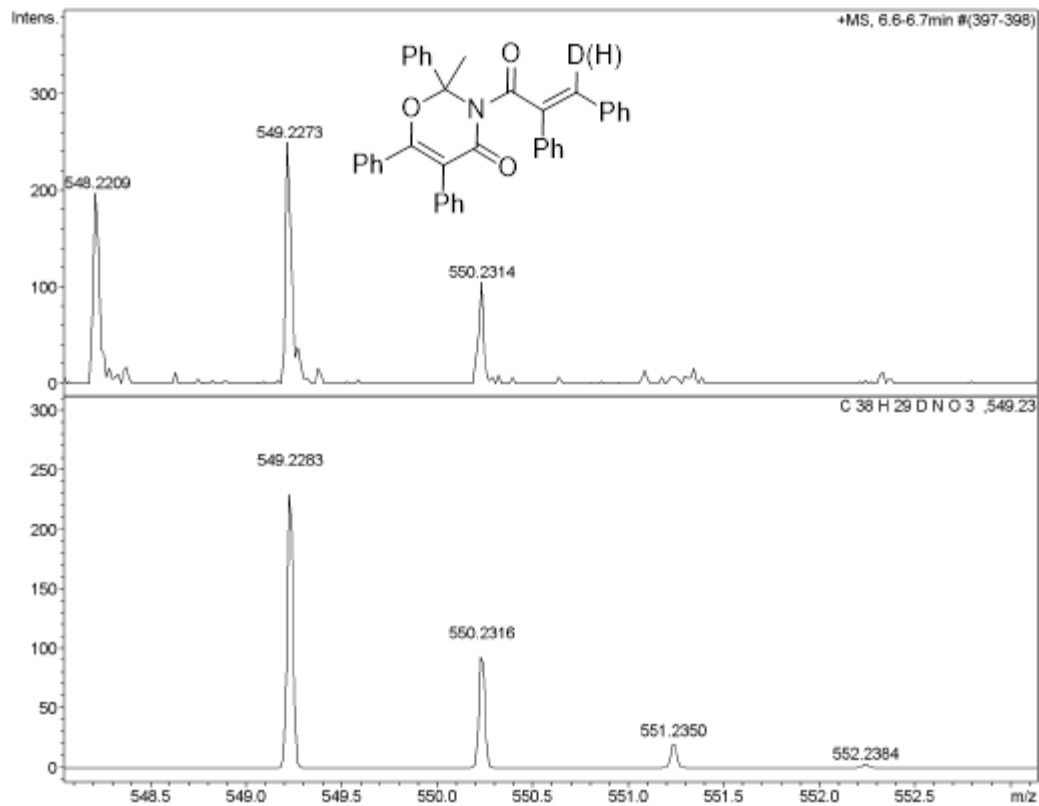

## Characterization of Products in Details:

(*E*)-3-(2,3 -diphenylacryloyl)-2-methyl-2,5,6-triphenyl-2,3-dihydro-4*H*-1,3-oxazin-4-one

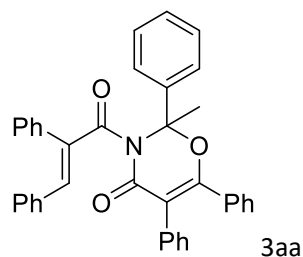

A pale yellow solid; (69 mg, 84% yield); m. p. 97.4-97.5 °C; <sup>1</sup>H NMR (500 MHz, DMSO): δ 7.68 (s, 1H), 7.65-7.63 (m, 2H), 7.48-7.45 (m, 2H), 7.42-7.33 (m, 7H), 7.29-7.18 (m, 9H), 7.10-7.03 (m, 3H), 6.44-6.43 (m, 2H), 2.24 (s, 3H). <sup>13</sup>C NMR (125 MHz, DMSO): δ 173.9, 163.7, 161.8, 141.2, 138.3, 138.2, 135.5, 134.5, 132.4, 131.9, 130.9, 130.9, 130.3, 130.2, 129.8, 129.2, 128.9, 128.5, 128.3, 128.2, 128.1, 127.9, 127.7, 127.1, 125.4, 112.4, 94.9, 27.9 ppm. HRMS (ESI) Calcd. for C<sub>38</sub>H<sub>30</sub>NO<sub>3</sub>: [M+H]<sup>+</sup>, 548.2220. Found: m/z 548.2228.

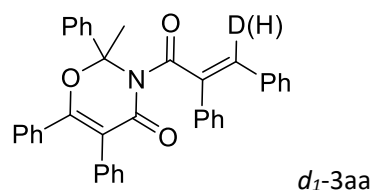

A pale yellow solid; (64 mg, 78% yield); m. p. 98.4-98.6 °C; <sup>1</sup>H NMR (500 MHz, DMSO): δ 7.68 (s, 0.1H), 7.64-7.63 (m, 2H), 7.48-7.45 (m, 2H), 7.42-7.35 (m, 7H), 7.30-7.23 (m, 5H), 7.21-7.18 (m, 4H), 7.10-7.02 (m, 3H), 6.43-6.42 (m, 2H), 2.24 (s, 3H). <sup>13</sup>C NMR (125 MHz, DMSO): δ 173.9, 163.7, 161.8, 141.2, 138.1, 135.4, 134.4, 132.4, 131.9, 130.9, 130.9, 130.3, 130.2, 129.7, 129.3, 128.9, 128.5, 128.3, 128.2, 128.1, 128.0, 127.7, 127.2, 125.4, 112.4, 94.9, 27.8 ppm. HRMS (ESI) Calcd. for C<sub>38</sub>H<sub>29</sub>DNO<sub>3</sub>: [M+H]<sup>+</sup>, 549.2273. Found: m/z 549.2283.

2-methyl-2,5,6-triphenyl-2,3-dihydro-4*H*-1,3-oxazin-4-one

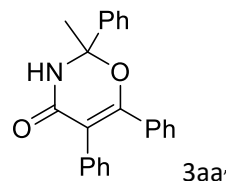

White solid; (37.5 mg, 55% yield); <sup>1</sup>H NMR (500 MHz, CDCl<sub>3</sub>): δ 8.03 (s, 1H), 7.70-7.64 (m, 2H), 7.41-7.32 (m, 3H), 7.28-7.20 (m, 3H), 7.17-7.08 (m, 5H), 7.00-6.92 (m, 2H), 7.10-7.02 (m, 3H), 2.00 (s, 3H) ppm. <sup>13</sup>C NMR (125 MHz, CDCl<sub>3</sub>): δ 165.6, 159.6, 142.8, 133.2, 131.3, 129.8, 129.7, 128.6, 128.3, 127.8, 127.7, 127.0, 112.9, 89.6, 29.3 ppm. HRMS (ESI) Calcd. for C<sub>23</sub>H<sub>20</sub>NO<sub>2</sub>: [M+H]<sup>+</sup>, 342.1489. Found: m/z 342.1487.

(*E*)-3-(2,3-diphenylacryloyl)-2-methyl-5,6-diphenyl-2-(*p*-tolyl)-2,3-dihydro-4*H*-1,3-oxazin-4-one

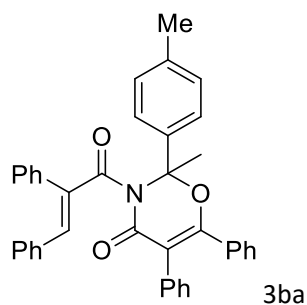

A pale yellow solid; (62.3 mg, 74% yield); m. p. 80.1-80.2 °C; <sup>1</sup>H NMR (400 MHz, CDCl<sub>3</sub>): δ 7.65 (s, 1H), 7.53 (d, *J* = 8.4Hz, 2H), 7.45-7.43 (m, 2H), 7.34-7.33 (m, 2H), 7.23-7.14 (m, 12H), 7.08-7.01 (m, 4H), 6.61-6.59 (m, 2H), 2.34 (s, 3H), 2.29 (s, 3H) ppm. <sup>13</sup>C NMR (125 MHz, CDCl<sub>3</sub>): δ 174.7, 164.3, 161.7, 139.0, 138.6, 138.5, 135.9, 135.2, 132.7, 132.6, 131.3, 130.7, 130.5, 130.4, 129.9, 129.2, 128.9, 128.3, 128.2, 128.1, 127.9, 127.9, 127.8, 127.2, 125.7, 113.3, 95.4, 28.6, 21.1 ppm. HRMS (ESI) Calcd. for C<sub>39</sub>H<sub>32</sub>NO<sub>3</sub>: [M+H]<sup>+</sup>, 562.2377. Found: m/z 562.2377.

(*E*)-3-(2,3-diphenylacryloyl)-2-(4-methoxyphenyl)-2-methyl-5,6-diphenyl-2,3-dihydro-4*H*-1,3-oxazin-4-one

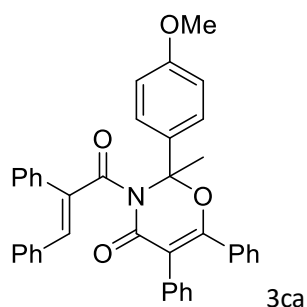

Yellow liquid; (69.7 mg, 80% yield); <sup>1</sup>H NMR (400 MHz, CDCl<sub>3</sub>): δ 7.60 (s, 1H), 7.53-7.51 (m, 2H), 7.40-7.38 (m, 2H), 7.29-7.26 (m, 3H), 7.19 (s, 1H), 7.17-7.11 (m, 9H), 7.03-6.97 (m, 3H), 6.87-6.83 (m, 2H), 6.59-6.66 (m, 2H), 3.73 (s, 3H), 2.24 (s, 3H) ppm. <sup>13</sup>C NMR (125 MHz, CDCl<sub>3</sub>): δ 174.8, 164.4, 161.6, 159.9, 139.0, 138.7, 135.9, 135.1, 133.4, 132.7, 132.7, 131.4, 130.7, 130.5, 130.5, 129.9, 128.9, 128.3, 128.2, 127.9, 127.8, 127.2, 127.2, 113.9, 113.3, 95.4, 55.3, 28.6 ppm. HRMS (ESI) Calcd. for C<sub>39</sub>H<sub>32</sub>NO<sub>4</sub>: [M+H]<sup>+</sup>, 578.2326. Found: m/z 578.2326.

(*E*)-3-(2,3-diphenylacryloyl)-2-(4-fluorophenyl)-2-methyl-5,6-diphenyl-2,3-dihydro-4*H*-1,3-oxazin-4-one

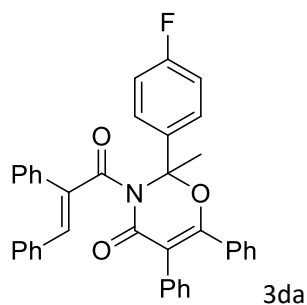

Red solid; (60.2 mg, 71% yield); m.p. 147.1-148.6 °C; <sup>1</sup>H NMR (400 MHz, CDCl<sub>3</sub>): δ 7.68-7.64 (m, 3H), 7.46-7.43 (m, 2H), 7.36-7.34 (m, 3H), 7.24-7.20 (m, 7H), 7.18-7.15 (m, 3H), 7.11-7.06

(m, 5H), 6.63-6.61 (m, 2H), 2.30 (s, 3H) ppm.  $^{13}\text{C}$  NMR (125 MHz,  $\text{CDCl}_3$ ):  $\delta$  174.8, 162.9 (d,  $J = 246.3\text{Hz}$ ), 162.8 (d,  $J = 321.3\text{Hz}$ ), 139.0, 138.8, 137.4, 137.4, 135.8, 135.0, 132.4, 132.4, 131.3, 130.7, 130.6, 130.6, 129.8, 129.0, 128.3, 128.2, 128.0, 128.0, 127.9, 127.7 (d,  $J = 8.8\text{Hz}$ ), 127.4, 115.5 (d,  $J = 21.3\text{Hz}$ ), 113.4, 94.9, 28.6 ppm. HRMS (ESI) Calcd. for  $\text{C}_{38}\text{H}_{29}\text{FNO}_3$ :  $[\text{M}+\text{H}]^+$ , 566.2126. Found:  $m/z$  566.2128.

(*E*)-2-(4-chlorophenyl)-3-(2,3-diphenylacryloyl)-2-methyl-5,6-diphenyl-2,3-dihydro-4*H*-1,3-oxazin-4-one

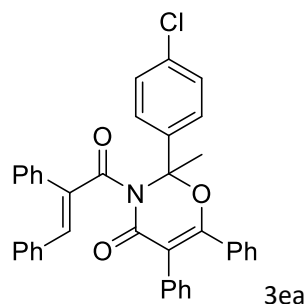

Yellow liquid; (66.7 mg, 76% yield);  $^1\text{H}$  NMR (400 MHz,  $\text{CDCl}_3$ ):  $\delta$  7.71 (s, 1H), 7.65-7.63 (m, 2H), 7.48-7.45 (m, 2H), 7.42-7.38 (m, 5H), 7.30 (s, 1H), 7.24-7.19 (m, 9H), 7.15-7.08 (m, 3H), 6.65 (d,  $J = 6.8\text{Hz}$ , 2H), 2.32 (s, 3H) ppm.  $^{13}\text{C}$  NMR (125 MHz,  $\text{CDCl}_3$ ):  $\delta$  174.7, 164.0, 161.6, 140.2, 139.1, 138.7, 135.8, 135.0, 134.8, 132.4, 132.3, 131.2, 130.7, 130.6, 130.6, 130.0, 129.0, 128.8, 128.3, 128.2, 128.0, 128.0, 127.9, 127.4, 127.2, 113.4, 94.8, 28.5 ppm. HRMS (ESI) Calcd. for  $\text{C}_{38}\text{H}_{29}\text{ClNO}_3$ :  $[\text{M}+\text{H}]^+$ , 582.1831. Found:  $m/z$  582.1830.

(*E*)-2-(4-bromophenyl)-3-(2,3-diphenylacryloyl)-2-methyl-5,6-diphenyl-2,3-dihydro-4*H*-1,3-oxazin-4-one

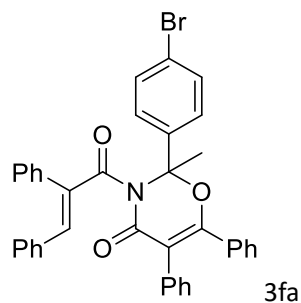

White solid; (48.5 mg, 52% yield); m.p. 132.8-133.8  $^\circ\text{C}$ ;  $^1\text{H}$  NMR (400 MHz,  $\text{CDCl}_3$ ):  $\delta$  7.67 (s, 1H), 7.54 (d,  $J = 2.4\text{Hz}$ , 4H), 7.44-7.42 (m, 2H), 7.35-7.29 (m, 4H), 7.21-7.19 (m, 6H), 7.18-7.14 (m, 3H), 7.11-7.07 (m, 3H), 6.62-6.60 (m, 2H), 2.28 (s, 3H) ppm.  $^{13}\text{C}$  NMR (125 MHz,  $\text{CDCl}_3$ ):  $\delta$  174.7, 164.0, 161.6, 140.8, 139.2, 138.7, 135.8, 135.0, 132.3, 132.3, 131.8, 131.3, 130.7, 130.7, 130.6, 129.8, 129.0, 128.3, 128.2, 128.0, 128.0, 127.9, 127.5, 127.4, 123.0, 113.4, 94.8, 28.4 ppm. HRMS (ESI) Calcd. for  $\text{C}_{38}\text{H}_{28}\text{BrNO}_3\text{Na}$ :  $[\text{M}+\text{Na}]^+$ , 648.1151. Found:  $m/z$  648.1152.

(*E*)-3-(2,3-diphenylacryloyl)-2-methyl-5,6-diphenyl-2-(4-(trifluoromethyl)phenyl)-2,3-dihydro-4*H*-1,3-oxazin-4-one



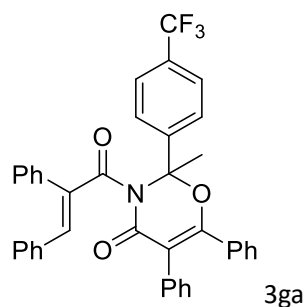

A pale red solid; (65.0 mg, 70% yield); m.p. 156.9-157.5 °C; <sup>1</sup>H NMR (400 MHz, CDCl<sub>3</sub>): δ 7.81 (d, *J* = 8.0Hz, 2H), 7.69-7.66 (m, 4H), 7.45-7.42 (m, 2H), 7.36-7.34 (m, 3H), 7.22-7.20(m, 6H), 7.18-7.15 (m, 3H), 7.10-7.05 (m, 3H), 6.59-6.57 (m, 2H), 2.30 (s, 3H) ppm. <sup>13</sup>C NMR (125 MHz, CDCl<sub>3</sub>): δ 174.7, 163.9, 161.7, 145.7, 139.4, 138.5, 135.7, 134.9, 132.2, 131.2, 131.0, 130.8, 130.7, 130.6, 129.8, 128.6 (q, *J* = 288.8Hz), 129.1, 128.4, 128.3, 128.2, 128.2 (q, *J* = 38.8Hz), 128.0, 127.9, 126.2, 125.7 (q, *J* = 3.8Hz), 125.5, 113.5, 94.6, 28.4 ppm. HRMS (ESI) Calcd. for C<sub>39</sub>H<sub>29</sub>F<sub>3</sub>NO<sub>3</sub>: [M+H]<sup>+</sup>, 616.2094. Found: m/z 616.2105.

(*E*)-3-(2,3-diphenylacryloyl)-2-(3-fluorophenyl)-2-methyl-5,6-diphenyl-2,3-dihydro-4*H*-1,3-oxazin-4-one

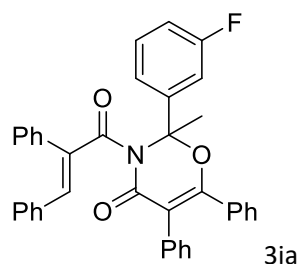

A pale yellow solid;(30.6 mg, 36% yield); m.p. 174.7-175.7 °C; <sup>1</sup>H NMR (400 MHz, CDCl<sub>3</sub>): δ 7.61 (s, 1H), 7.40-7.36 (m, 3H), 7.34-7.30 (m, 2H), 7.29-7.27 (m, 3H), 7.26-7.23 (m, 1H), 7.20 (s, 1H), 7.15-7.13 (m, 5H), 7.12-7.11 (m, 2H), 7.03-6.97 (m, 4H), 6.56-6.54 (m, 2H), 2.23(s,3H). <sup>13</sup>C NMR (125 MHz, CDCl<sub>3</sub>): δ 174.6, 162.9 (d, *J* = 245.0Hz), 162.8 (d, *J* = 281.3Hz), 144.4, 144.4, 139.2, 138.7, 135.8, 135.0, 132.4, 132.3, 131.2, 130.7, 130.6, 130.5, 130.2 (d, *J* = 7.5Hz), 129.8, 129.0, 128.3, 128.2, 128.0, 127.9, 127.9, 127.4, 121.6 (d, *J*=2.5Hz), 116.0 (d, *J*=21.3Hz), 113.4, 113.0 (d, *J* = 22.5Hz), 94.6, 28.4 ppm. HRMS (ESI) Calcd. for C<sub>38</sub>H<sub>28</sub>FNO<sub>3</sub>Na: [M+Na]<sup>+</sup>, 588.1951. Found: m/z 588.1945.

(*E*)-2-(3-chlorophenyl)-3-(2,3-diphenylacryloyl)-2-methyl-5,6-diphenyl-2,3-dihydro-4*H*-1,3-oxazin-4-one

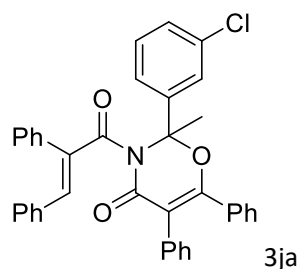

A pale red solid; (51.0 mg, 61% yield); m.p. 175.3-175.4 °C; <sup>1</sup>H NMR (400 MHz, CDCl<sub>3</sub>): δ 7.62

(s,2H), 7.50-7.47 (m, 1H), 7.38-7.35 (m, 2H), 7.30-7.23 (m, 6H), 7.21 (s, 1H), 7.17-7.14 (m, 6H), 7.12-7.11 (m, 2H), 7.05-6.98 (m, 3H), 6.57-6.55 (m,2H), 2.23 (s, 3H) ppm. <sup>13</sup>C NMR (125 MHz, CDCl<sub>3</sub>): δ 174.6, 163.8, 161.7, 143.8, 139.2, 138.6, 135.8, 135.0, 134.7, 132.3, 131.3, 130.7, 130.7, 130.6, 129.9, 129.8, 129.2, 129.0, 128.3, 128.2, 128.1, 128.0, 127.9, 127.4, 125.9, 124.2, 113.4, 94.5, 28.4 ppm. HRMS (ESI) Calcd. for C<sub>38</sub>H<sub>29</sub>ClNO<sub>3</sub>: [M+H]<sup>+</sup>, 582.1831. Found: m/z 582.1830.

(*E*)-3-(2,3-diphenylacryloyl)-2-methyl-5,6-diphenyl-2-(*m*-tolyl)-2,3-dihydro-4*H*-1,3-oxazin-4-one

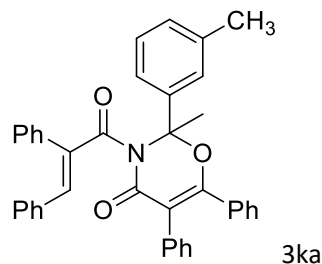

A pale yellow solid; (54.0 mg, 64% yield); m.p. 151.6-152.6 °C; <sup>1</sup>H NMR (500 MHz, CDCl<sub>3</sub>): δ 7.61 (s, 1H), 7.40-7.38 (m, 4H), 7.31-7.26 (m, 3H), 7.17-7.09 (m, 11H), 7.04-6.97 (m, 4H), 6.54 (d, *J* = 7.5Hz, 2H), 2.30 (s, 3H), 2.24 (s, 3H) ppm. <sup>13</sup>C NMR (125 MHz, CDCl<sub>3</sub>): δ 174.7, 164.2, 161.8, 141.5, 138.9, 138.7, 138.3, 135.9, 135.2, 132.6, 131.3, 130.8, 130.5, 130.4, 129.9, 129.6, 128.9, 128.4, 128.2, 128.1, 127.9, 127.8, 127.2, 126.5, 122.7, 113.4, 95.4, 28.6, 21.6 ppm. HRMS (ESI) Calcd. for C<sub>39</sub>H<sub>32</sub>NO<sub>3</sub>: [M+H]<sup>+</sup>, 562.2377. Found: m/z 562.2377.

(*E*)-3-(2,3-diphenylacryloyl)-2-(3-methoxyphenyl)-2-methyl-5,6-diphenyl-2,3-dihydro-4*H*-1,3-oxazin-4-one

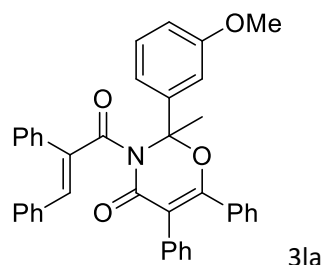

Yellow solid; (64.0 mg, 74% yield); m.p.149.3-150.9 °C; <sup>1</sup>H NMR (400 MHz, CDCl<sub>3</sub>): δ 7.68 (s, 1H), 7.45-7.43 (m, 2H), 7.35-7.31 (m, 3H), 7.30-7.27 (m, 2H), 7.25-7.22 (m, 6H), 7.20-7.14 (m, 5H), 7.09-7.06 (m, 2H), 7.04 (s, 1H), 6.90-6.87 (m, 1H), 6.62-6.60 (m, 2 H), 3.79 (s, 3H), 2.30 (s, 3H) ppm. <sup>13</sup>C NMR (125 MHz, CDCl<sub>3</sub>): δ 174.6, 164.2, 161.8, 159.8, 143.3, 138.9, 138.8, 135.9, 135.1, 132.6, 132.6, 131.3, 130.8, 130.5, 129.9, 129.6, 128.9, 128.3, 128.2, 128.1, 128.0, 127.9, 127.8, 127.2, 118.2, 114.4, 113.4, 111.6, 95.2, 55.3, 28.6 ppm. HRMS (ESI) Calcd. for C<sub>39</sub>H<sub>32</sub>NO<sub>4</sub>: [M+H]<sup>+</sup>, 578.2326. Found: m/z 578.2326.

(*E*)-3-(2,3-diphenylacryloyl)-2-(2-fluorophenyl)-2-methyl-5,6-diphenyl-2,3-dihydro-4*H*-1,3-oxazin-4-one

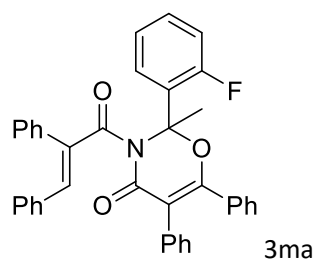

A pale yellow solid; (53.0 mg, 63% yield); m.p. 160.6-161.3 °C; <sup>1</sup>H NMR (400 MHz, CDCl<sub>3</sub>): δ 7.71 (s, 1H), 7.51-7.46 (m, 3H), 7.39-7.34 (m, 4H), 7.28-7.23 (m, 5H), 7.21-7.17 (m, 6H), 7.13-7.05 (m, 4H), 6.68-6.66 (m, 2H), 2.45 (s, 3H) ppm. <sup>13</sup>C NMR (125 MHz, CDCl<sub>3</sub>): δ 174.8, 163.3 (d, *J* = 257.5Hz), 159.8 (d, *J* = 247.5Hz), 139.0, 138.9, 135.8, 135.0, 132.5, 131.4, 131.0 (d, *J* = 7.5Hz), 130.7, 130.6, 130.5, 130.5, 130.0, 130.0, 129.0, 128.3, 128.2, 128.0, 127.9, 127.4, 127.3, 127.2, 124.2 (d, *J* = 3.8Hz), 116.8 (d, *J* = 22.5Hz), 112.3, 94.2 (d, *J* = 3.8Hz), 25.8 ppm. HRMS (ESI) Calcd. for C<sub>38</sub>H<sub>28</sub>FNO<sub>3</sub>Na: [M+Na]<sup>+</sup>, 588.1951. Found: m/z 588.1945.

(*E*)-2-(2-chlorophenyl)-3-(2,3-diphenylacryloyl)-2-methyl-5,6-diphenyl-2,3-dihydro-4*H*-1,3-oxazin-4-one

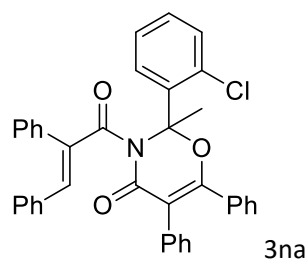

A pale yellow solid; (46.7 mg, 54% yield); m.p. 130.7-131.2 °C; <sup>1</sup>H NMR (400 MHz, CDCl<sub>3</sub>): δ 7.75 (s, 1H), 7.66 (dd, *J* = 2.0Hz, 1H), 7.51-7.48 (m, 3H), 7.39-7.38 (m, 5H), 7.33-7.29 (m, 4H), 7.24-7.21(m, 6H), 7.15-7.11 (m, 3H), 6.74-6.72 (m, 2H), 2.59 (s, 3H) ppm. <sup>13</sup>C NMR (125 MHz, CDCl<sub>3</sub>): δ 174.8, 164.4, 162.4, 139.0, 138.9, 136.8, 135.8, 135.0, 132.6, 132.5, 132.3, 131.3, 131.1, 130.7, 130.6, 130.5, 130.3, 130.3, 129.0, 128.3, 128.2, 128.0, 127.9, 127.9, 127.8, 127.3, 126.9, 112.5, 95.3, 24.9 ppm. HRMS (ESI) Calcd. for C<sub>38</sub>H<sub>29</sub>ClNO<sub>3</sub>: [M+H]<sup>+</sup>, 582.1831. Found: m/z 582.1830.

(*E*)-3-(2,3-diphenylacryloyl)-2-ethyl-2-(4-methoxyphenyl)-5,6-diphenyl-2,3-dihydro-4*H*-1,3-oxazin-4-one

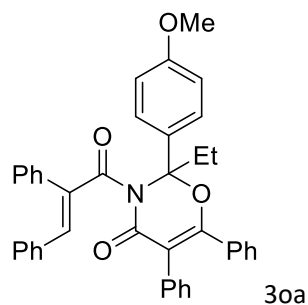

Red liquid; (73.2 mg, 83% yield); <sup>1</sup>H NMR (400 MHz, CDCl<sub>3</sub>): δ 7.68-7.65 (m, 1H), 7.58-7.55 (m, 2H), 7.50-7.47 (m, 2H), 7.36-7.31 (m, 6H), 7.25-7.19 (m, 5H), 7.15-7.12 (m, 2H), 7.10-7.03(m, 3H),

6.88(d,  $J = 8.8\text{Hz}$ , 2H), 6.68 (d,  $J = 7.2\text{Hz}$ , 2H), 3.79 (s, 3H), 2.79 (q,  $J = 7.2\text{Hz}$ , 1H), 2.55 (q,  $J = 7.2\text{ Hz}$ , 1H), 1.27 (t,  $J = 6.8\text{Hz}$ , 3H) ppm.  $^{13}\text{C}$  NMR (125 MHz,  $\text{CDCl}_3$ ):  $\delta$  174.8, 165.3, 161.7, 159.7, 138.8, 138.2, 136.1, 135.1, 132.9, 132.8, 132.7, 131.4, 130.6, 130.5, 130.5, 129.9, 128.8, 128.3, 128.1, 128.0, 127.9, 127.9, 127.5, 127.3, 113.7, 113.4, 98.1, 55.3, 33.4, 8.8 ppm. HRMS (ESI) Calcd. for  $\text{C}_{40}\text{H}_{34}\text{NO}_4$ :  $[\text{M}+\text{H}]^+$ , 592.2483. Found:  $m/z$  592.2482.

(*E*)-3-(2,3-diphenylacryloyl)-2,5,6-triphenyl-2-propyl-2,3-dihydro-4*H*-1,3-oxazin-4-one

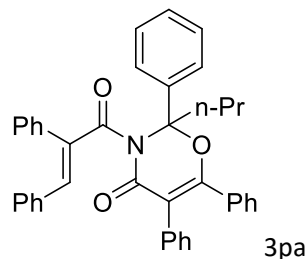

A pale red solid; (67.5 mg, 78% yield); m.p. 73.0-74.0 °C;  $^1\text{H}$  NMR (400 MHz,  $\text{CDCl}_3$ ):  $\delta$  7.68-7.67 (m, 3H), 7.52-7.49 (m, 2H), 7.38-7.33 (m, 9H), 7.24-7.20 (m, 4H), 7.19-7.15 (m, 3H), 7.11-7.04 (m, 3H), 6.64 (d,  $J = 7.2\text{Hz}$ , 2H), 2.81-2.73 (m, 1H), 2.54-2.46 (m, 1H), 1.89-1.70 (m, 2H), 1.03 (t,  $J = 7.6\text{Hz}$ , 3H) ppm.  $^{13}\text{C}$  NMR (125 MHz,  $\text{CDCl}_3$ ):  $\delta$  174.7, 165.1, 161.9, 141.2, 138.8, 138.4, 136.1, 135.2, 132.8, 132.7, 131.3, 130.7, 130.6, 130.5, 130.0, 128.9, 128.7, 128.4, 128.3, 128.2, 128.1, 127.9, 127.9, 127.3, 126.1, 113.5, 97.8, 42.4, 17.5, 14.2 ppm. HRMS (ESI) Calcd. for  $\text{C}_{40}\text{H}_{34}\text{NO}_3$ :  $[\text{M}+\text{H}]^+$ , 576.2533. Found:  $m/z$  576.2533.

(*E*)-3-(2,3-diphenylacryloyl)-2,2,5,6-tetraphenyl-2,3-dihydro-4*H*-1,3-oxazin-4-one

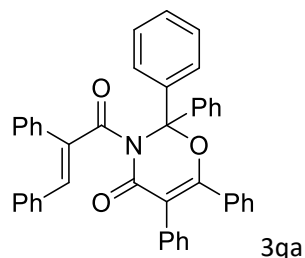

Yellow liquid; (46.3 mg, 51% yield);  $^1\text{H}$  NMR (500 MHz,  $\text{CDCl}_3$ ):  $\delta$  7.55-7.51 (m, 5H), 7.34-7.33 (m, 7H), 7.21-7.17 (m, 4H), 7.16 (s, 1H), 7.13-7.00 (m, 12H), 6.64 (d,  $J = 6.5\text{Hz}$ , 2H) ppm.  $^{13}\text{C}$  NMR (125 MHz,  $\text{CDCl}_3$ ):  $\delta$  174.0, 164.6, 160.7, 139.2, 138.9, 138.7, 135.7, 135.0, 132.7, 132.6, 131.3, 130.8, 130.5, 130.0, 129.5, 129.4, 129.3, 129.2, 129.1, 129.0, 128.9, 128.6, 128.4, 128.2, 128.1, 128.0, 127.9, 127.4, 113.4, 98.5 ppm. HRMS (ESI) Calcd. for  $\text{C}_{43}\text{H}_{32}\text{NO}_3$ :  $[\text{M}+\text{H}]^+$ , 610.2377. Found:  $m/z$  610.2377.

(*E*)-3-(2,3-diphenylacryloyl)-2-(furan-2-yl)-2-methyl-5,6-diphenyl-2,3-dihydro-4*H*-1,3-oxazin-4-one

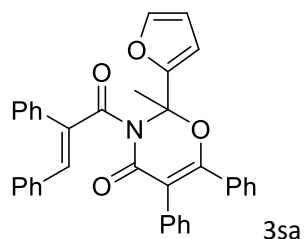

A pale red solid; (32.3 mg, 40% yield); m.p. 110.3-111.4 °C;  $^1\text{H}$  NMR (400 MHz,  $\text{CDCl}_3$ ):  $\delta$  7.64 (s, 1H), 7.49 (s, 1H), 7.46-7.43 (m, 2H), 7.39-7.34 (m, 3H), 7.24-7.12 (m, 13H), 6.77-6.75 (m, 2H), 6.55 (d,  $J = 3.2\text{Hz}$ , 1H), 6.39-3.38 (m, 1H), 2.37 (s, 3H) ppm.  $^{13}\text{C}$  NMR (125 MHz,  $\text{CDCl}_3$ ):  $\delta$  174.1, 164.0, 161.2, 151.6, 143.1, 138.8, 138.7, 135.8, 135.1, 132.5, 132.4, 131.5, 130.7, 130.6, 130.5, 130.1, 129.0, 128.3, 128.2, 127.9, 127.9, 127.3, 112.6, 111.0, 110.7, 90.3, 24.7 ppm. HRMS (ESI) Calcd. for  $\text{C}_{36}\text{H}_{27}\text{NO}_4\text{Na}$ :  $[\text{M}+\text{Na}]^+$ , 560.1838. Found:  $m/z$  560.1832.

(*E*)-3-(2,3-diphenylacryloyl)-2-methyl-5,6-diphenyl-2-(thiophen-2-yl)-2,3-dihydro-4*H*-1,3-oxazin-4-one

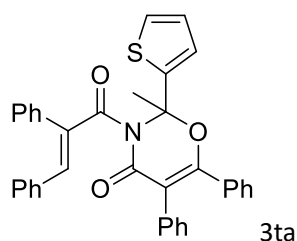

A pale red solid; (69.7 mg, 84% yield); m.p. 112.3-113.8 °C;  $^1\text{H}$  NMR (400 MHz,  $\text{CDCl}_3$ ):  $\delta$  7.67 (s, 1H), 7.46-7.43 (m, 2H), 7.39-7.35 (m, 3H), 7.32-7.31 (m, 1H), 7.30-7.27 (m, 3H), 7.26-7.24 (m, 2H), 7.22-7.17 (m, 6H), 7.13-7.07 (m, 3H), 6.95-6.93 (m, 1H), 6.74-6.71 (m, 2H), 2.42 (s, 3H) ppm.  $^{13}\text{C}$  NMR (125 MHz,  $\text{CDCl}_3$ ):  $\delta$  174.3, 164.1, 161.3, 144.7, 138.9, 138.8, 135.9, 135.1, 132.5, 131.4, 130.7, 130.6, 130.5, 130.3, 129.0, 128.3, 128.2, 128.1, 128.0, 127.9, 127.3, 126.7, 125.7, 112.9, 93.2, 29.2 ppm. HRMS (ESI) Calcd. for  $\text{C}_{36}\text{H}_{28}\text{NO}_3\text{S}$ :  $[\text{M}+\text{H}]^+$ , 554.1785. Found:  $m/z$  554.1784.

(*E*)-2,2-dibenzyl-3-(2,3-diphenylacryloyl)-5,6-diphenyl-2,3-dihydro-4*H*-1,3-oxazin-4-one

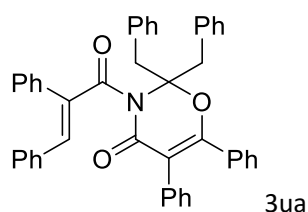

White solid; (77.8 mg, 81% yield); m. p. 151.5-152.3 °C;  $^1\text{H}$  NMR (400 MHz,  $\text{CDCl}_3$ ):  $\delta$  7.38-7.34 (m, 5H), 7.32-7.28 (m, 8H), 7.24-7.19 (m, 8H), 7.13-7.05 (m, 5H), 6.99-6.97 (m, 2H), 6.80 (d,  $J = 7.2\text{Hz}$ , 2H), 6.43 (s, 1H), 4.02 (d,  $J = 14.4\text{Hz}$ , 2H), 3.55 (d,  $J = 14.4\text{Hz}$ , 2H) ppm.  $^{13}\text{C}$  NMR (125 MHz,  $\text{CDCl}_3$ ):  $\delta$  175.8, 164.8, 160.2, 138.8, 137.1, 136.2, 135.2, 135.1, 132.8, 132.2, 131.6, 131.6, 130.7, 130.4, 130.3, 130.2, 128.4, 128.2, 128.2, 127.9, 127.8, 127.7, 127.6, 127.3, 111.1, 97.3, 42.4 ppm. HRMS (ESI) Calcd. for  $\text{C}_{45}\text{H}_{36}\text{NO}_3$ :  $[\text{M}+\text{H}]^+$ , 638.2690. Found:  $m/z$  638.2690.

(*E*)-3-(2,3-diphenylacryloyl)-2,2-diethyl-5,6-diphenyl-2,3-dihydro-4*H*-1,3-oxazin-4-one

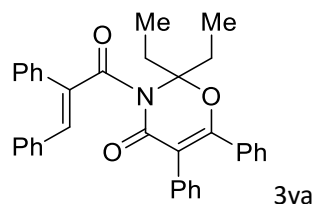

Red solid ; (70.2 mg, 91% yield); m.p. 122.5-123.4 °C; <sup>1</sup>H NMR (400 MHz, CDCl<sub>3</sub>): δ 7.50 (s, 1H), 7.45-7.43 (m, 2H), 7.36-7.32 (m, 4H), 7.30-7.27 (m, 2H), 7.23-7.16 (m, 8H), 7.12-7.10 (m, 2H), 7.04-7.01 (m, 2H), 2.62-2.53 (m, 2H), 2.44-2.34 (m, 2H), 1.19 (t, *J* = 7.6Hz, 6H) ppm. <sup>13</sup>C NMR (125 MHz, CDCl<sub>3</sub>): δ 174.6, 165.1, 161.6, 139.0, 137.1, 136.1, 135.2, 133.0, 132.9, 131.7, 130.5, 130.4, 130.0, 128.7, 128.3, 128.1, 127.9, 127.9, 127.3, 111.0, 98.5, 28.2, 8.4 ppm. HRMS (ESI) Calcd. for C<sub>35</sub>H<sub>32</sub>NO<sub>3</sub>: [M+H]<sup>+</sup>, 514.2377. Found: m/z 514.2377.

(*E*)-2-cyclohexyl-3-(2,3-diphenylacryloyl)-2-methyl-5,6-diphenyl-2,3-dihydro-4*H*-1,3-oxazin-4-one

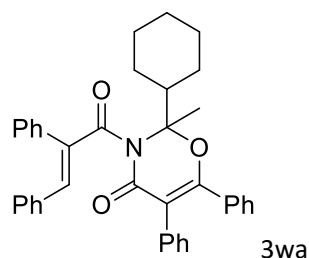

White solid; (48.8 mg, 59% yield); m.p. 152.6-153.6 °C; <sup>1</sup>H NMR (400 MHz, CDCl<sub>3</sub>): δ 7.51 (s, 1H), 7.41-7.39 (m, 2H), 7.33-7.29 (m, 4H), 7.22-7.15 (m, 1H), 7.13-7.10 (m, 2H), 6.94-6.92 (m, 2H), 2.68-2.60 (m, 1H), 1.99 (s, 3H), 1.90-1.87 (m, 2H), 1.73-1.71 (m, 1H), 1.61 (s, 1H), 1.45 (q, *J* = 12.0Hz, 2H), 1.23-1.21 (m, 2H) ppm. <sup>13</sup>C NMR (125 MHz, CDCl<sub>3</sub>): δ 174.4, 164.3, 161.5, 139.1, 137.7, 136.0, 135.3, 132.9, 131.6, 130.6, 130.4, 130.4, 130.1, 128.7, 128.2, 128.1, 128.0, 127.8, 127.2, 111.2, 111.1, 98.1, 43.1, 28.0, 27.6, 26.5, 26.4, 26.3, 21.3 ppm. HRMS (ESI) Calcd. for C<sub>38</sub>H<sub>36</sub>NO<sub>3</sub>: [M+H]<sup>+</sup>, 554.2690. Found: m/z 554.2690.

(*E*)-2-butyl-3-(2,3-diphenylacryloyl)-2-methyl-5,6-diphenyl-2,3-dihydro-4*H*-1,3-oxazin-4-one

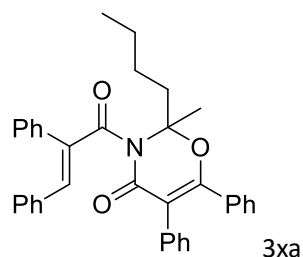

White oil; (44.3 mg, 56% yield); <sup>1</sup>H NMR (500 MHz, CDCl<sub>3</sub>): δ 7.52 (s, 1H), 7.42-7.38 (m, 2H), 7.33-7.28 (m, 3H), 7.28-7.24 (m, 1H), 7.21-7.08 (m, 12H), 7.00-6.96 (m, 2H), 2.56-2.46 (m, 1H), 2.33-2.23 (m, 1H), 2.02 (s, 3H), 1.74-1.52 (m, 2H), 1.44-1.35 (m, 2H), 0.95 (q, *J* = 6.0 Hz, 3H) ppm. <sup>13</sup>C NMR (125 MHz, CDCl<sub>3</sub>): δ 174.8, 164.1, 161.2, 139.1, 137.5, 135.9, 135.0, 132.8, 132.7, 131.5, 130.4, 130.3, 129.8, 128.7, 128.2, 128.0, 127.9, 127.8, 127.7, 127.2, 111.0, 95.4, 36.8, 26.0, 23.5, 22.7, 13.9 ppm. HRMS (ESI) Calcd. for C<sub>36</sub>H<sub>34</sub>NO<sub>3</sub>: [M+H]<sup>+</sup>, 528.2533. Found: m/z

528.2536.

(*E*)-10-(2,3-diphenylacryloyl)-7,8-diphenyl-6-oxa-10-azaspiro[4.5]dec-7-en-9-one

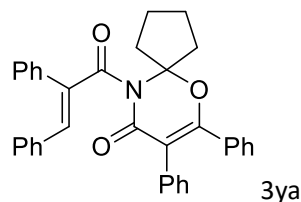

Red solid; (35.6 mg, 47% yield); m.p. 133.7-134.8 °C; <sup>1</sup>H NMR (400 MHz, CDCl<sub>3</sub>): δ 7.56 (s, 1H), 7.41-7.38 (m, 2H), 7.35-7.28 (m, 4H), 7.23-7.13 (m, 12H), 7.04-7.01 (m, 2H), 2.61-2.47 (m, 4H), 2.13-1.97 (m, 4H) ppm. <sup>13</sup>C NMR (125 MHz, CDCl<sub>3</sub>): δ 175.5, 164.4, 161.8, 139.3, 138.1, 135.9, 135.1, 133.0, 132.7, 131.6, 130.5, 130.5, 129.9, 128.9, 128.3, 128.1, 128.0, 128.0, 127.9, 127.3, 111.6, 103.1, 36.2, 24.0 ppm. HRMS (ESI) Calcd. for C<sub>35</sub>H<sub>30</sub>NO<sub>3</sub>: [M+H]<sup>+</sup>, 512.2220. Found: m/z 512.2220.

(*E*)-5-(2,3-diphenylacryloyl)-2,3-diphenyl-1-oxa-5-azaspiro[5.5]undec-2-en-4-one

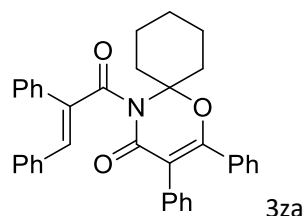

A pale yellow solid; (48.9 mg, 59% yield); m.p. 137.8-138.3 °C; <sup>1</sup>H NMR (400 MHz, CDCl<sub>3</sub>): δ 7.54 (s, 1H), 7.34-7.33 (m, 2H), 7.30-7.25 (m, 4H), 7.22-7.21 (m, 3H), 7.18-7.11 (m, 7H), 7.07-7.06 (m, 2H), 6.97-6.96 (m, 2H), 2.52-2.38 (m, 4H), 1.82 (s, 4H), 1.56 (s, 1H), 1.43-1.38 (m, 1H) ppm. <sup>13</sup>C NMR (125 MHz, CDCl<sub>3</sub>): δ 175.3, 164.0, 160.6, 139.5, 138.4, 135.9, 135.1, 133.1, 132.9, 131.6, 130.5, 130.5, 130.4, 130.1, 128.9, 128.2, 128.1, 128.1, 128.0, 127.8, 127.3, 111.3, 94.2, 32.6, 24.6, 22.6 ppm. HRMS (ESI) Calcd. for C<sub>36</sub>H<sub>31</sub>NO<sub>3</sub>Na: [M+Na]<sup>+</sup>, 548.2202. Found: m/z 548.2196.

(*E*)-5-(2,3-diphenylacryloyl)-2,3-diphenyl-1-oxa-5-azaspiro[5.6]dodec-2-en-4-one

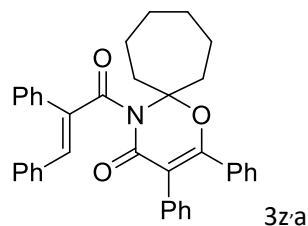

Red solid; (34.1 mg, 43% yield); m.p. 171.4-172.1 °C; <sup>1</sup>H NMR (400 MHz, CDCl<sub>3</sub>): δ 7.55 (s, 1H), 7.41-7.39 (m, 2H), 7.37-7.27 (m, 5H), 7.23-7.15 (m, 9H), 7.13-7.11 (m, 2H), 7.02-7.00 (m, 2H), 2.68-2.55 (m, 4H), 1.95-1.85 (m, 4H), 1.80-1.72 (m, 4H) ppm. <sup>13</sup>C NMR (125 MHz, CDCl<sub>3</sub>): δ 175.6, 164.2, 160.6, 139.6, 137.9, 136.0, 135.1, 133.1, 132.8, 131.6, 130.5, 130.5, 130.4, 129.9, 128.8, 128.3, 128.1, 128.0, 128.0, 127.9, 127.3, 111.3, 98.5, 37.5, 28.9, 22.6 ppm. HRMS (ESI) Calcd. for C<sub>37</sub>H<sub>33</sub>NO<sub>3</sub>Na: [M+Na]<sup>+</sup>, 562.2358. Found: m/z 562.2329.

(*E*)-3-(2,3-bis(4-fluorophenyl)acryloyl)-5,6-bis(4-fluorophenyl)-2-methyl-2-phenyl-2,3-dihydro-4*H*-1,3-oxazin-4-one

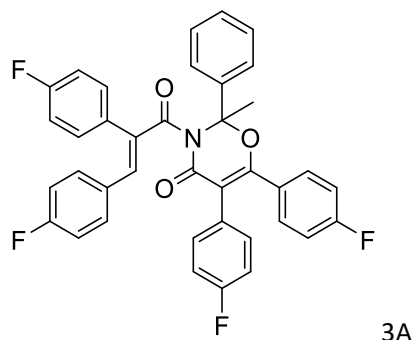

A pale orange solid; (47.5 mg, 51% yield); m.p.172.2-173.3 °C; <sup>1</sup>H NMR (400 MHz, CDCl<sub>3</sub>): δ 7.60-7.59 (m, 3H), 7.41-7.36 (m, 5H), 7.25-7.21 (m, 2H), 7.15-7.11 (m, 2H), 7.05 (t, *J* = 8.8Hz, 2H), 6.94-6.89 (m, 4H), 6.77 (t, *J* = 8.8Hz, 2H), 6.56-6.53 (m, 2H), 2.29 (s, 3H) ppm. <sup>13</sup>C NMR (125 MHz, CDCl<sub>3</sub>): δ 174.3, 164.2, 163.9 (d, *J* = 252.5Hz), 163.0 (d, *J* = 248.8Hz), 162.6 (d, *J* = 246.3Hz), 162.1 (d, *J* = 246.3Hz), 161.0, 141.1, 137.9, 137.5, 132.8 (d, *J* = 7.5Hz), 132.5 (d, *J* = 8.8Hz), 132.3 (d, *J* = 8.8Hz), 132.1 (d, *J* = 8.8Hz), 131.6 (d, *J* = 3.8Hz), 130.9 (d, *J* = 2.5Hz), 129.1, 128.7, 128.3 (d, *J* = 2.5Hz), 128.2 (d, *J* = 3.8Hz), 125.6, 115.5 (d, *J* = 21.3Hz), 115.4 (d, *J* = 21.3Hz), 115.2 (d, *J* = 21.3Hz), 112.2, 95.6, 28.4 ppm. HRMS (ESI) Calcd. for C<sub>38</sub>H<sub>26</sub>F<sub>4</sub>NO<sub>3</sub>: [M+H]<sup>+</sup>, 620.1844. Found: m/z 620.1818.

(*E*)-3-(2,3-bis(4-chlorophenyl)acryloyl)-5,6-bis(4-chlorophenyl)-2-methyl-2-phenyl-2,3-dihydro-4*H*-1,3-oxazin-4-one

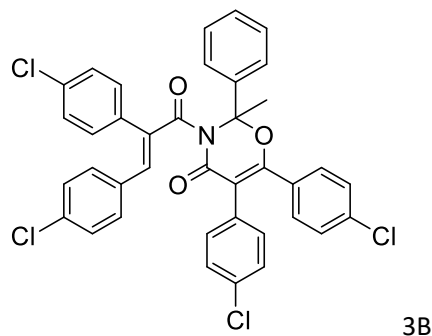

Luminous yellow solid; (63.6 mg, 62% yield); m.p. 112.0-113.0 °C; <sup>1</sup>H NMR (400 MHz, CDCl<sub>3</sub>): δ 7.60-7.56 (m, 3H), 7.39-7.35 (m, 3H), 7.33-7.30 (m, 4H), 7.24-7.19 (m, 4H), 7.16-7.14 (m, 2H), 7.10-7.03 (m, 4H), 6.49 (d, *J* = 8.0Hz, 2H), 2.28 (s, 3H) ppm. <sup>13</sup>C NMR (125 MHz, CDCl<sub>3</sub>): δ 137.8, 163.9, 161.2, 140.9, 138.0, 137.3, 135.3, 134.3, 133.9, 133.7, 133.1, 132.4, 132.1, 131.6, 131.2, 130.6, 130.4, 129.2, 129.0, 128.7, 128.7, 128.7, 128.6, 128.4, 125.5, 112.5, 95.7, 28.4 ppm. HRMS (ESI) Calcd. for C<sub>38</sub>H<sub>25</sub>Cl<sub>4</sub>NO<sub>3</sub>Na: [M+Na]<sup>+</sup>, 706.0487. Found: m/z 706.0468.

(*E*)-3-(2,3-di-*p*-tolylacryloyl)-2-methyl-2-phenyl-5,6-di-*p*-tolyl-2,3-dihydro-4*H*-1,3-oxazin-4-one



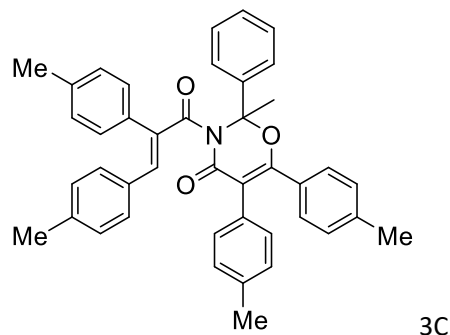

Yellow solid; (23.2 mg, 26% yield); m.p. 106.7-107.5 °C;  $^1\text{H}$  NMR (400 MHz,  $\text{CDCl}_3$ ):  $\delta$  7.64-7.62 (m, 2H), 7.59 (s, 1H), 7.38-7.31 (m, 5H), 7.16-7.07 (m, 6H), 7.01 (t,  $J = 7.6\text{Hz}$ , 4H), 6.85 (d,  $J = 8.0\text{Hz}$ , 2H), 6.50 (d,  $J = 8.0\text{Hz}$ , 2H), 2.32 (s, 3H), 2.30 (d,  $J = 2.4\text{Hz}$ , 6H), 2.26 (s, 3H), 2.19 (s, 3H) ppm.  $^{13}\text{C}$  NMR (125 MHz,  $\text{CDCl}_3$ ):  $\delta$  175.2, 164.5, 161.4, 141.8, 140.8, 139.0, 138.5, 138.0, 137.4, 136.7, 133.2, 132.5, 131.1, 130.6, 129.9, 129.9, 129.9, 129.0, 128.9, 128.7, 128.6, 128.6, 128.4, 125.7, 112.9, 95.0, 28.6, 21.4, 21.4, 21.3, 21.1 ppm. HRMS (ESI) Calcd. for  $\text{C}_{42}\text{H}_{38}\text{NO}_3$ :  $[\text{M}+\text{H}]^+$ , 604.2846. Found:  $m/z$  604.2840.

(*E*)-3-(2,3-bis(3-chlorophenyl)acryloyl)-5,6-bis(3-chlorophenyl)-2-methyl-2-phenyl-2,3-dihydro-4H-1,3-oxazin-4-one

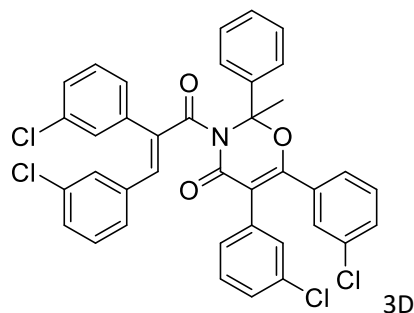

Yellow solid ;(86.2 mg, 84% yield); m.p. 141.9-142.3 °C;  $^1\text{H}$  NMR (400 MHz,  $\text{CDCl}_3$ ):  $\delta$  7.60-7.57 (m, 3H), 7.44-7.39 (m, 4H), 7.35-7.33 (m, 2H), 7.32-7.27 (m, 3H), 7.25-7.23 (m, 1H), 7.16-7.09 (m, 4H), 7.01-6.98 (m, 2H), 6.95-6.63 (m, 1H), 6.63 (s, 1H), 6.42 (d,  $J = 8\text{Hz}$ , 1H), 2.30 (s, 3H) ppm.  $^{13}\text{C}$  NMR (125 MHz,  $\text{CDCl}_3$ ):  $\delta$  173.4, 163.8, 161.0, 140.6, 138.5, 137.8, 130.7, 136.2, 134.4, 134.3, 133.9, 133.7, 133.6, 131.0, 131.0, 130.5, 130.3, 129.7, 129.6, 129.5, 129.4, 129.4, 129.3, 129.3, 128.9, 128.8, 128.5, 128.4, 128.2, 127.9, 125.6, 96.0, 28.3 ppm. HRMS (ESI) Calcd. for  $\text{C}_{38}\text{H}_{25}\text{Cl}_4\text{NO}_3\text{Na}$ :  $[\text{M}+\text{Na}]^+$ , 706.0487. Found:  $m/z$  706.0468.

# <sup>1</sup>H and <sup>13</sup>CNMR of products:

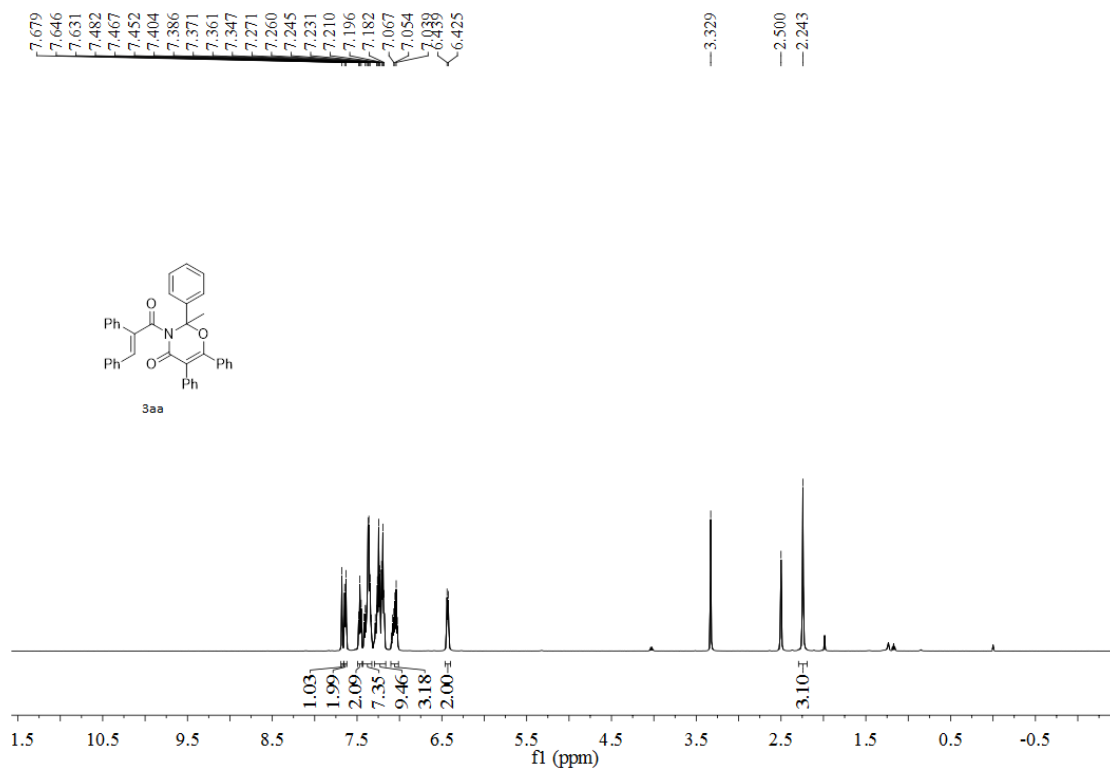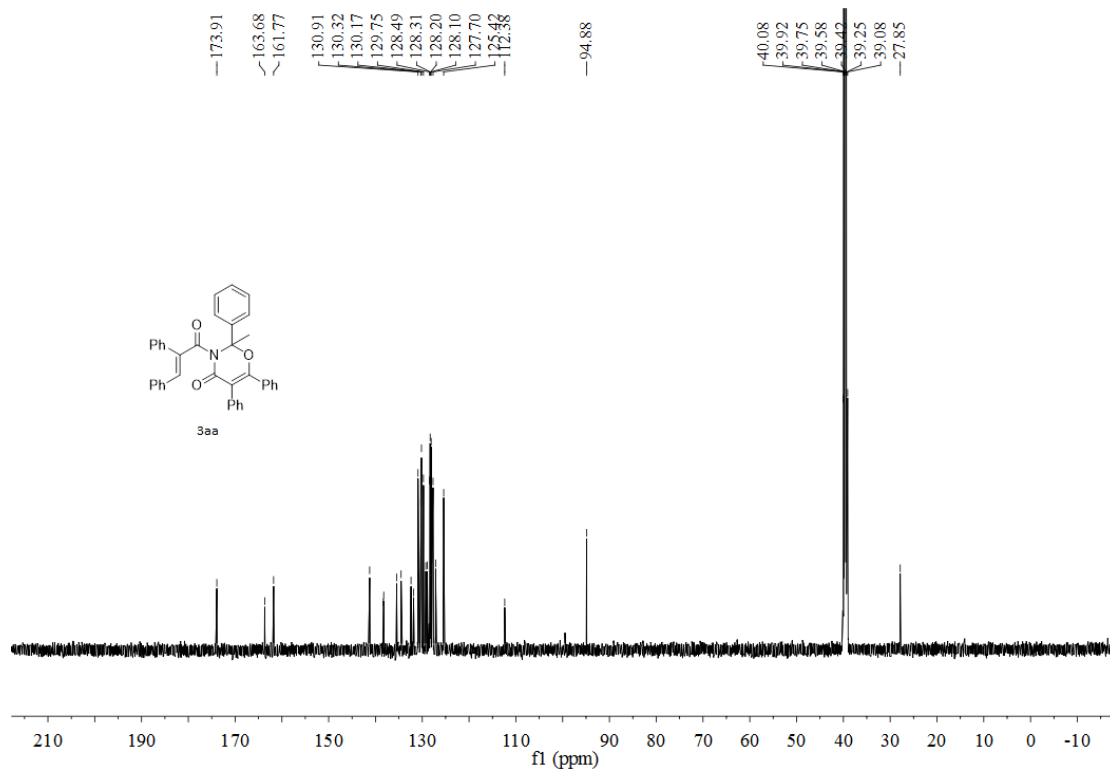

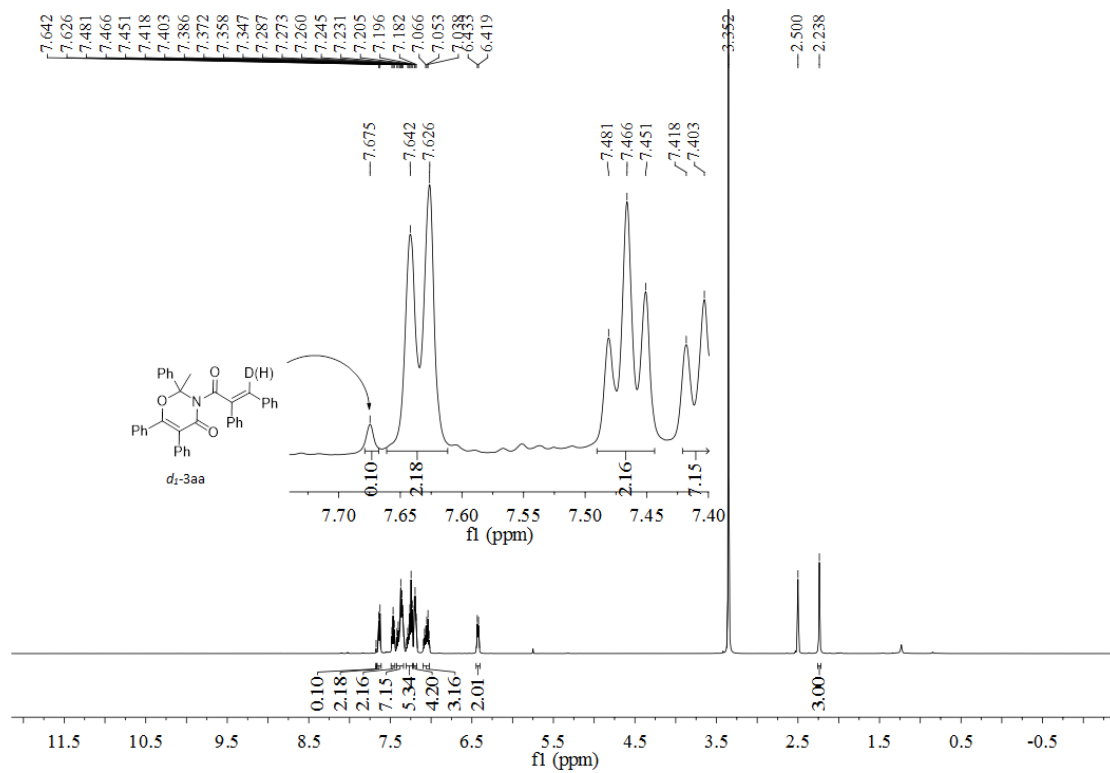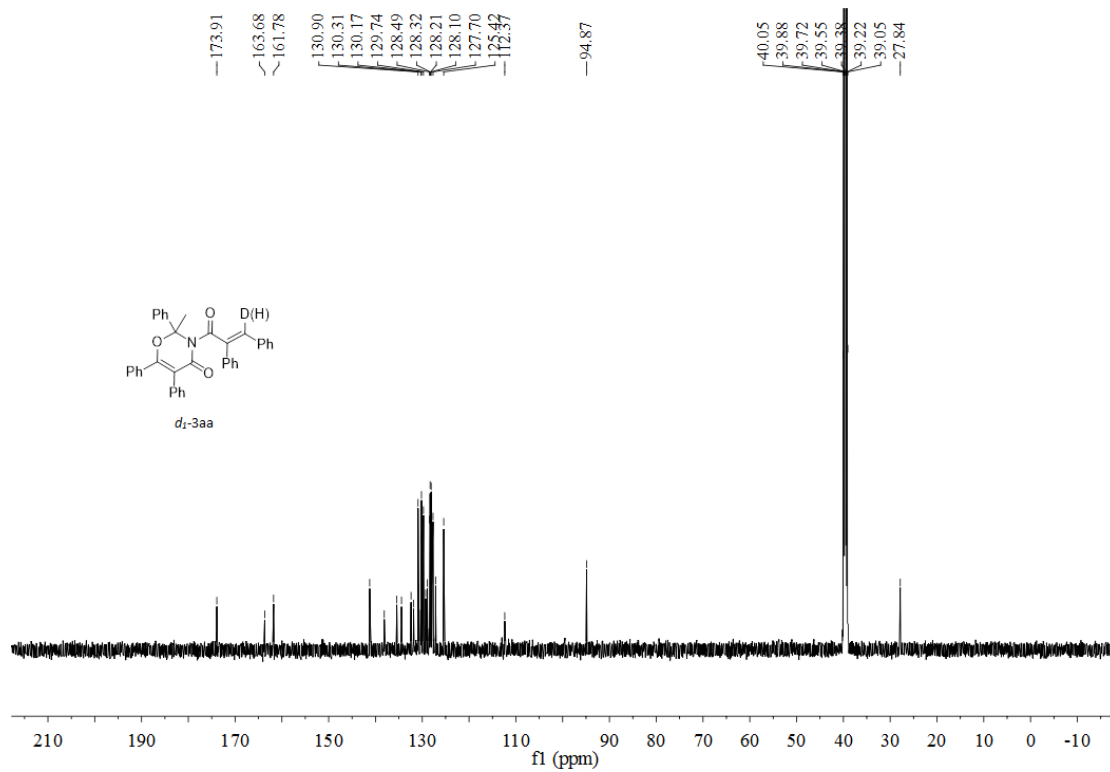

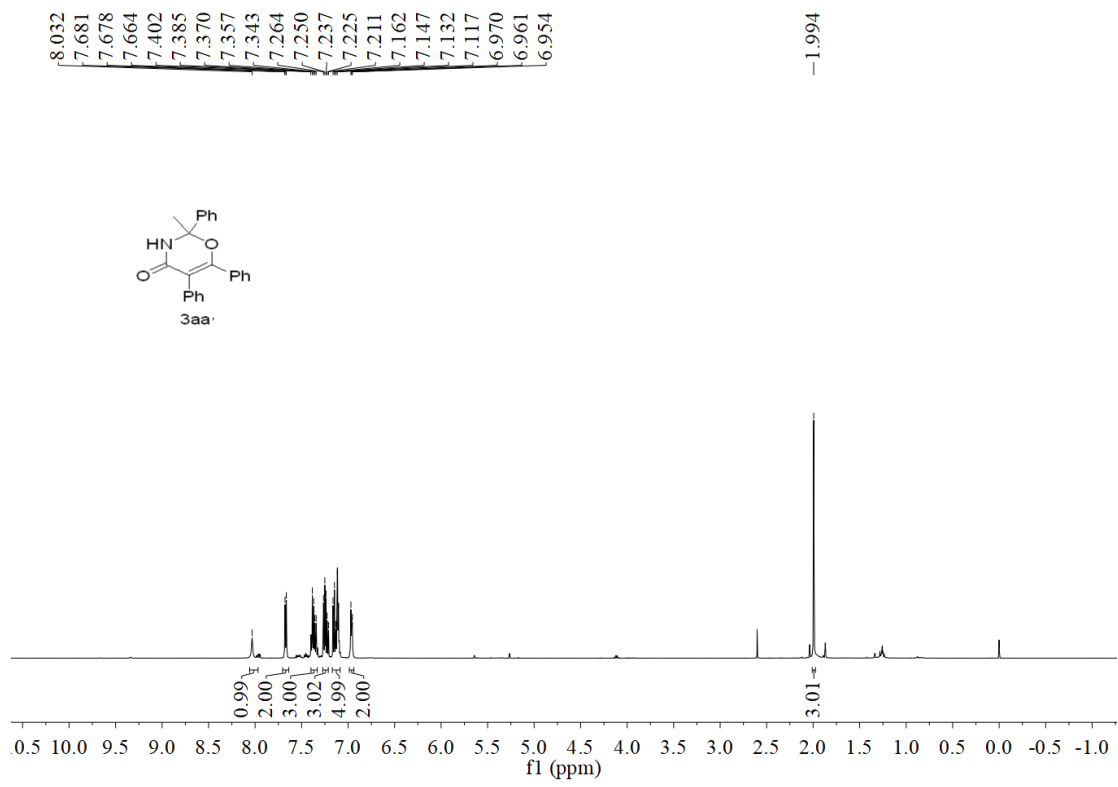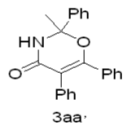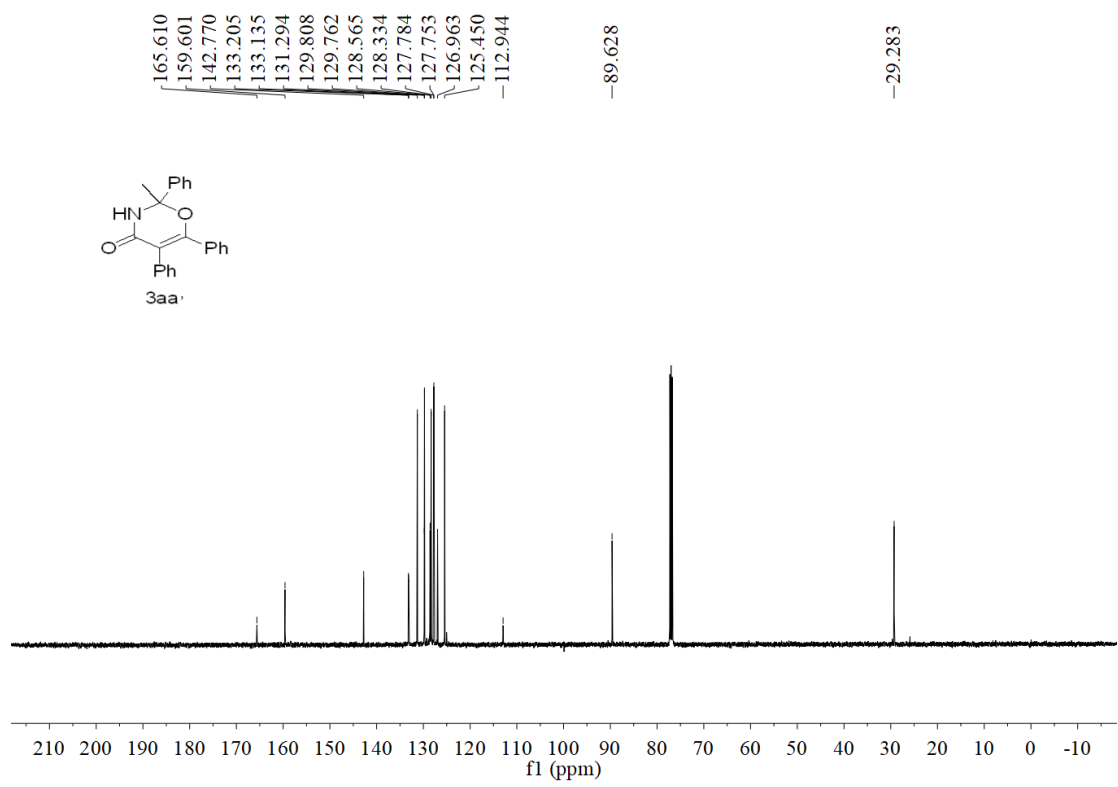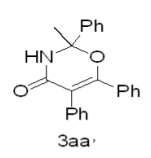

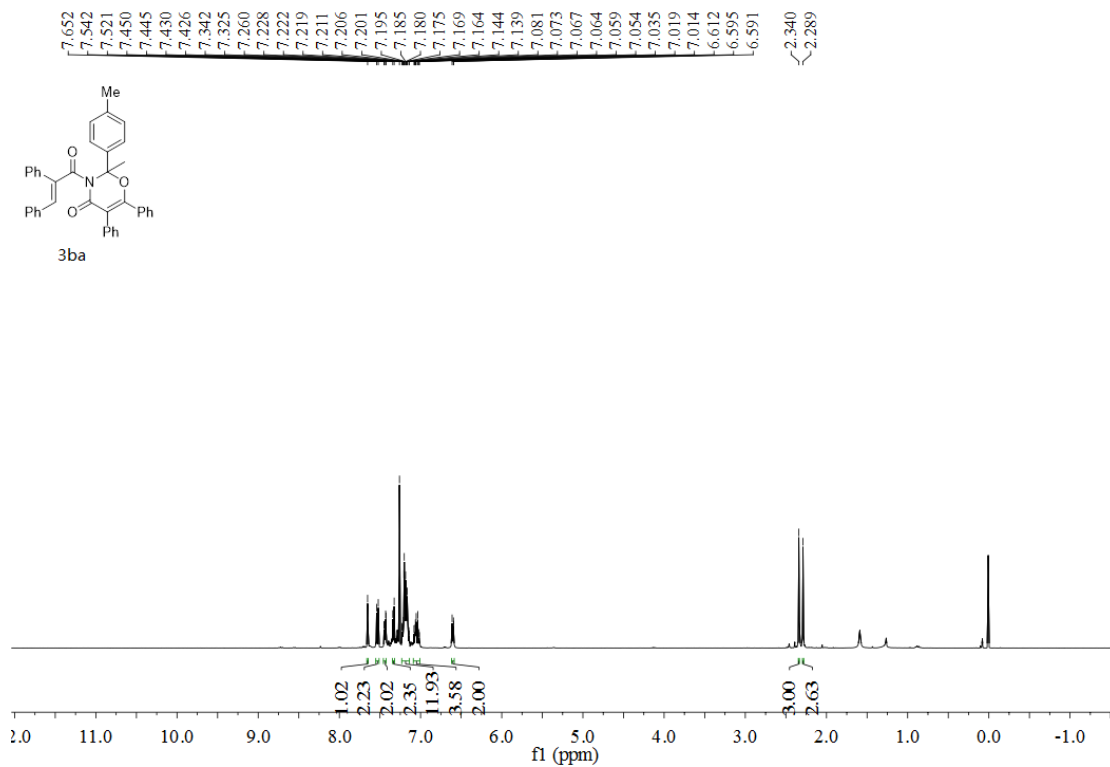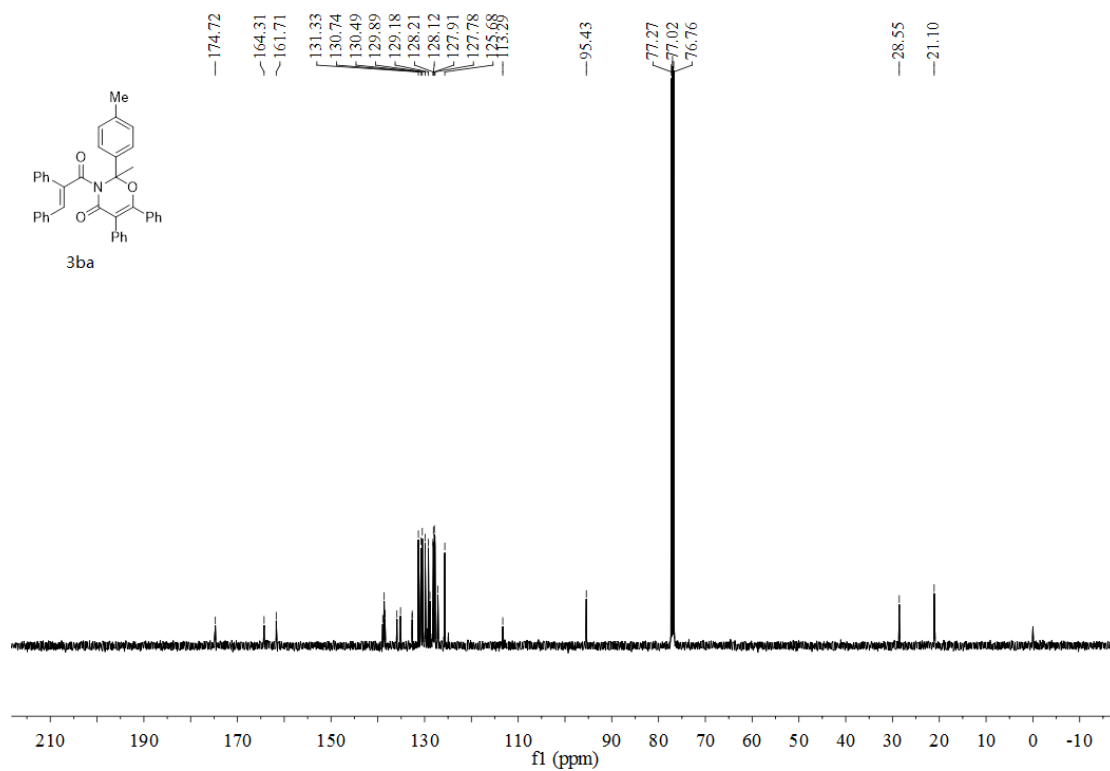

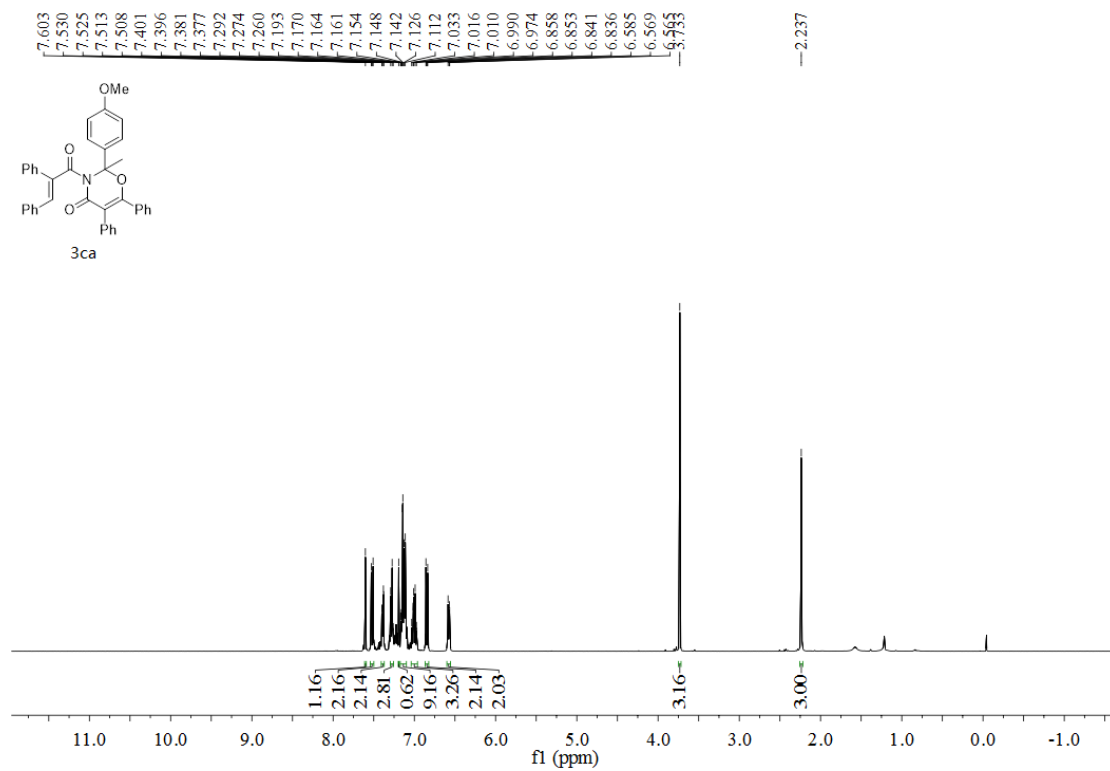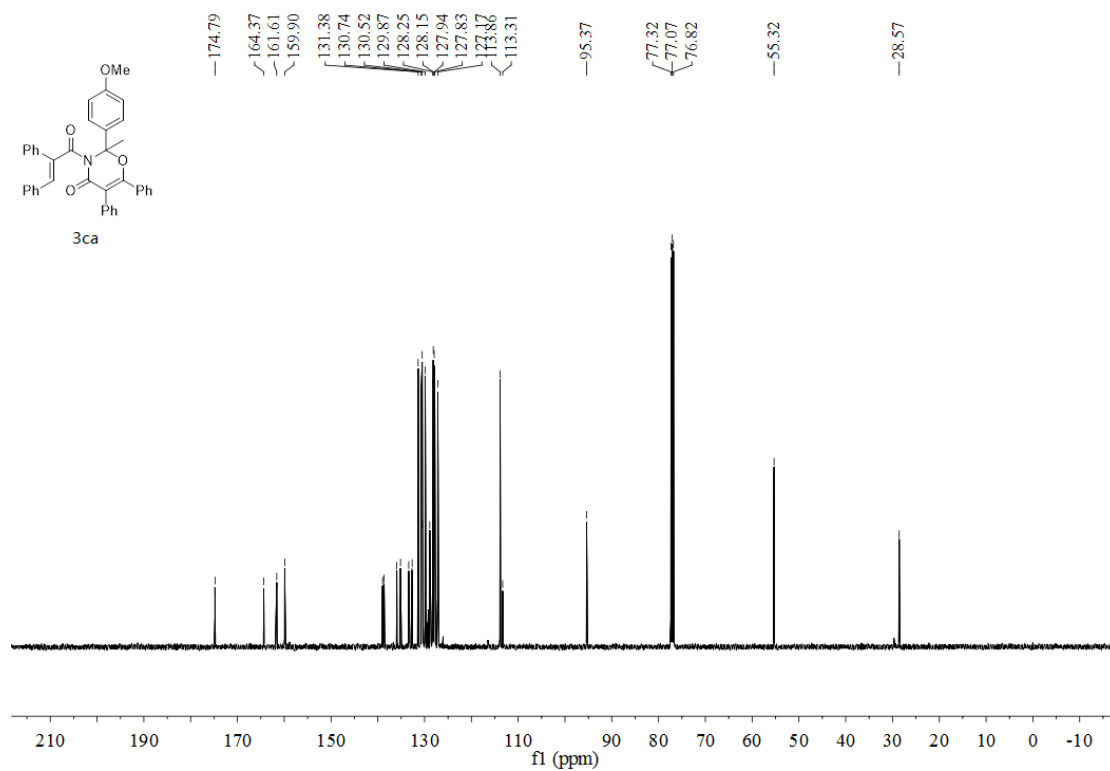

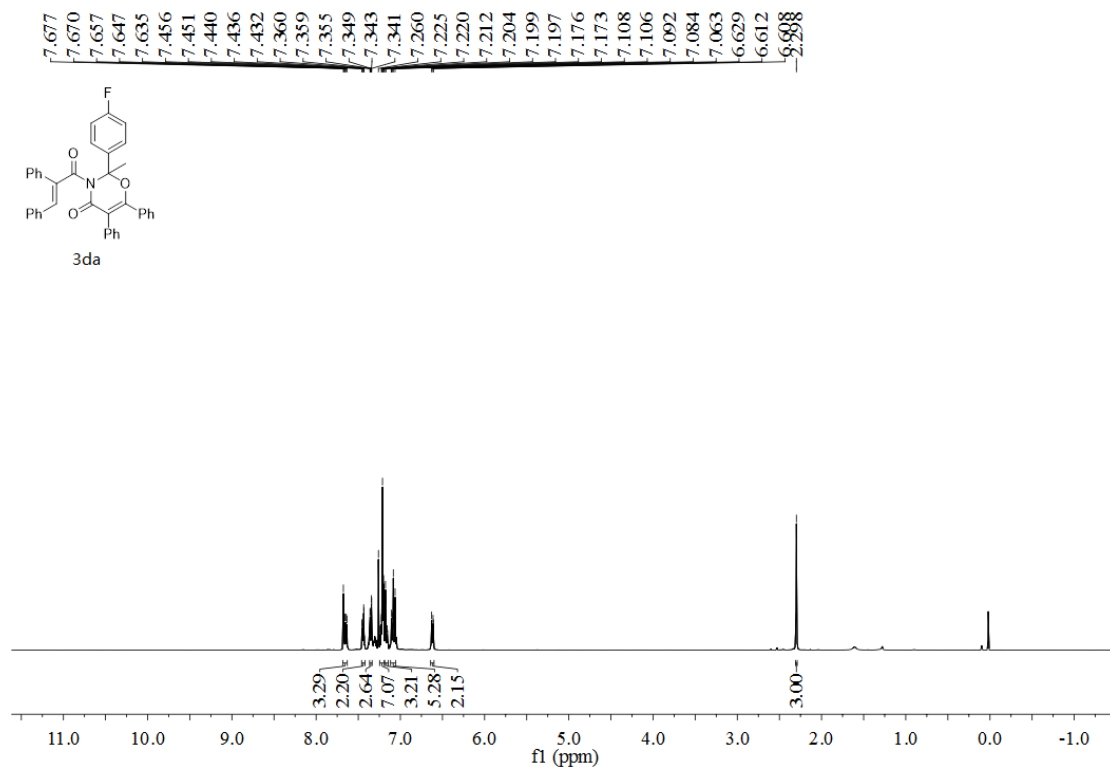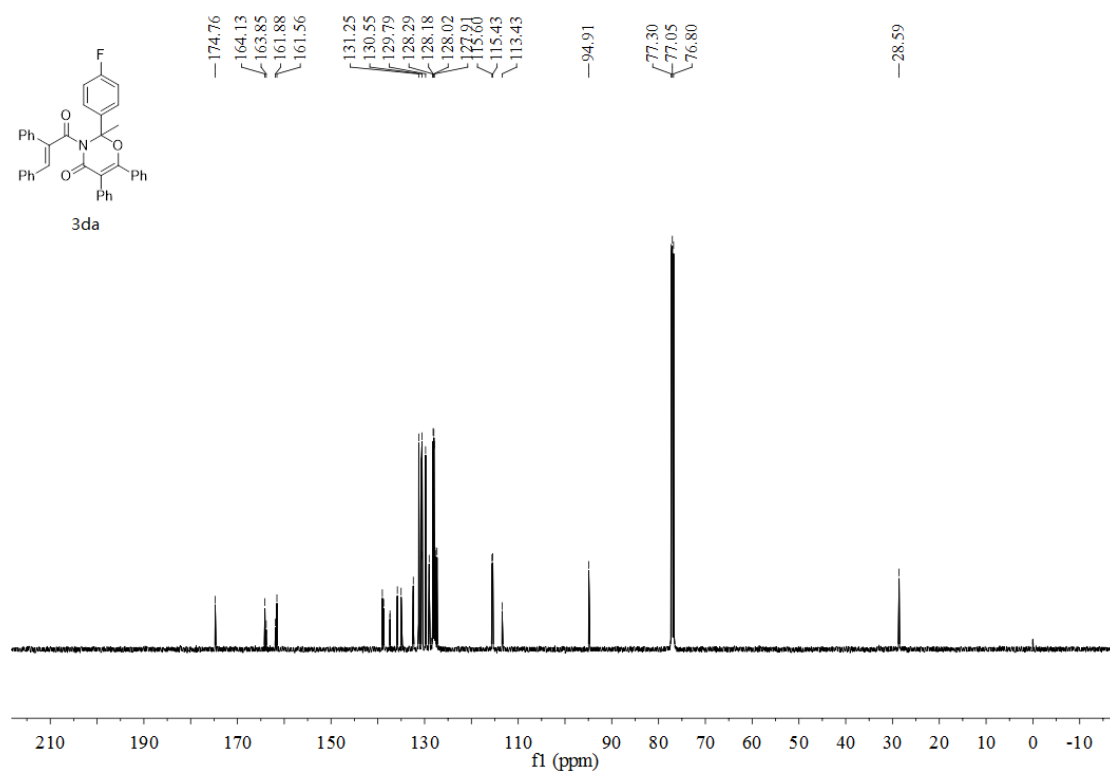

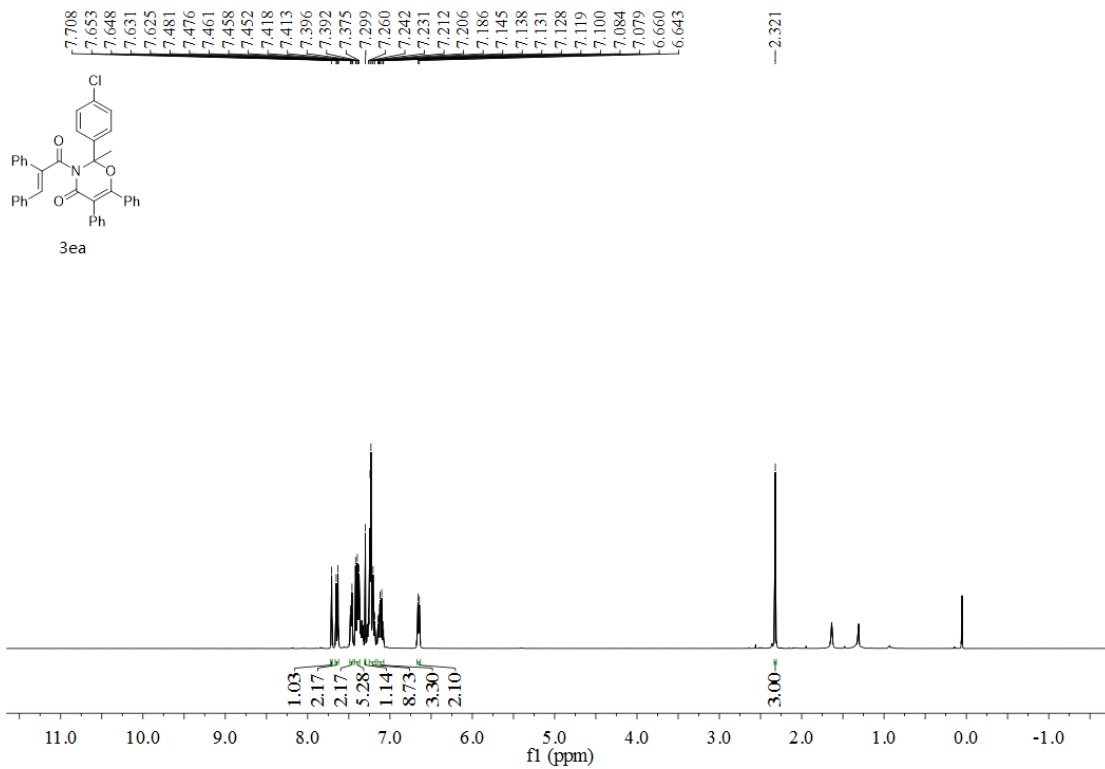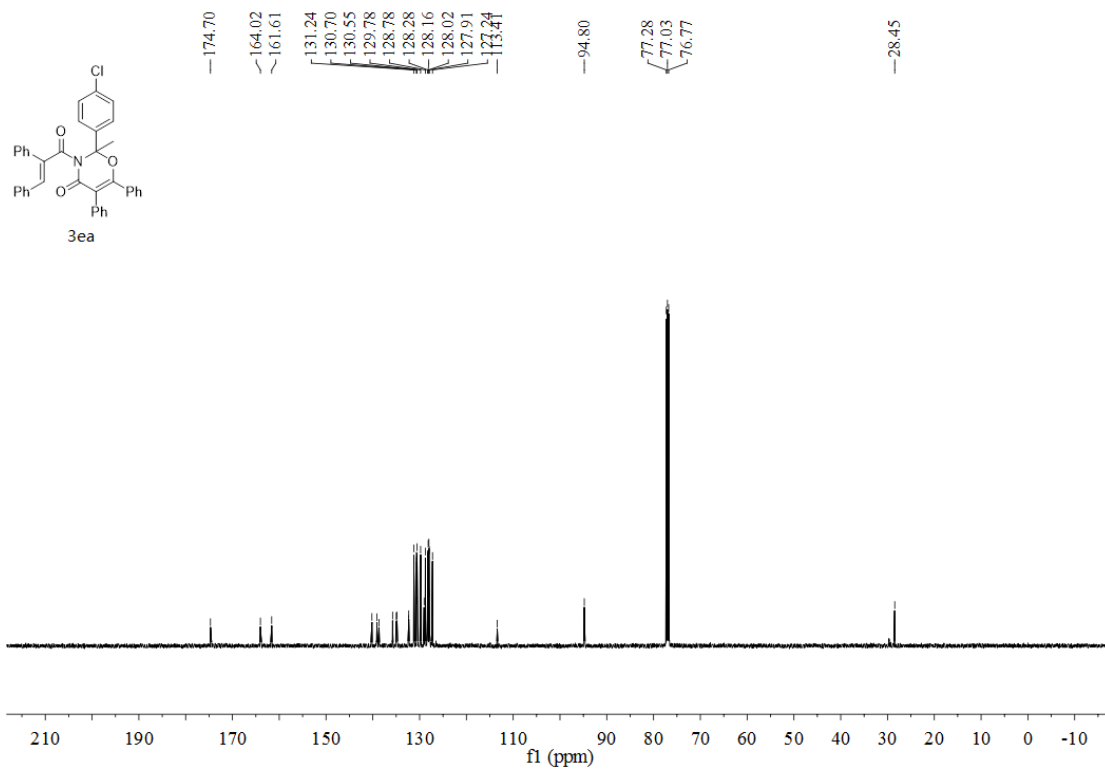



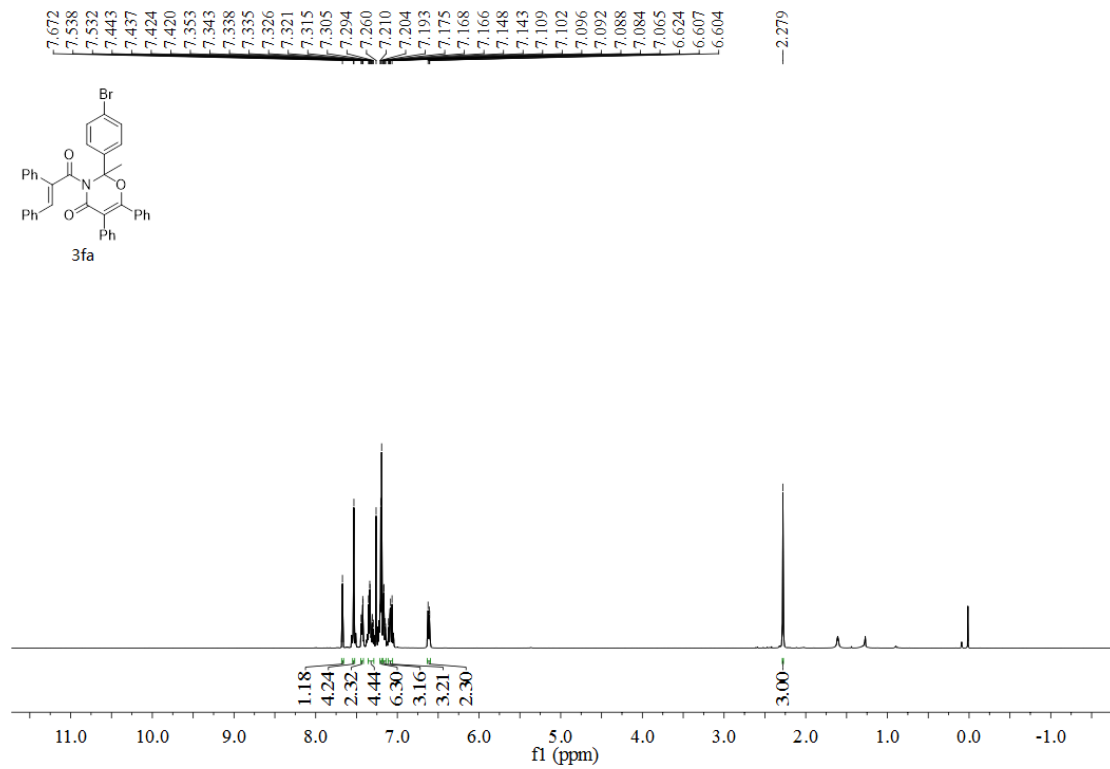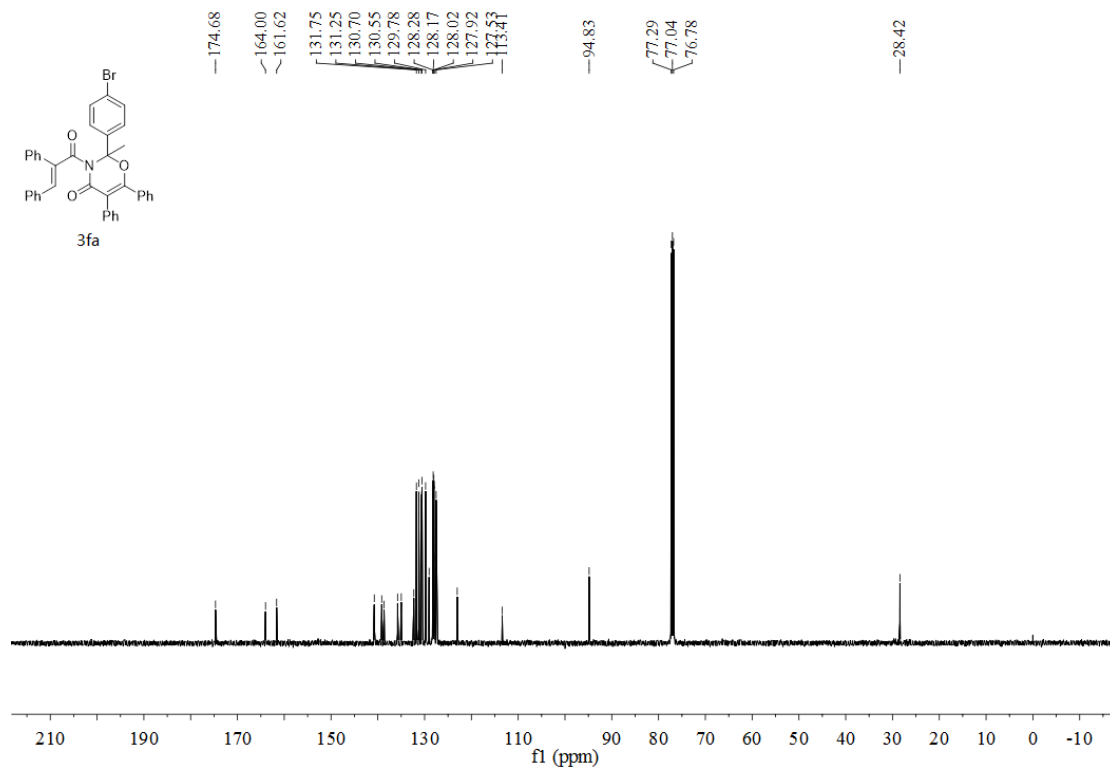

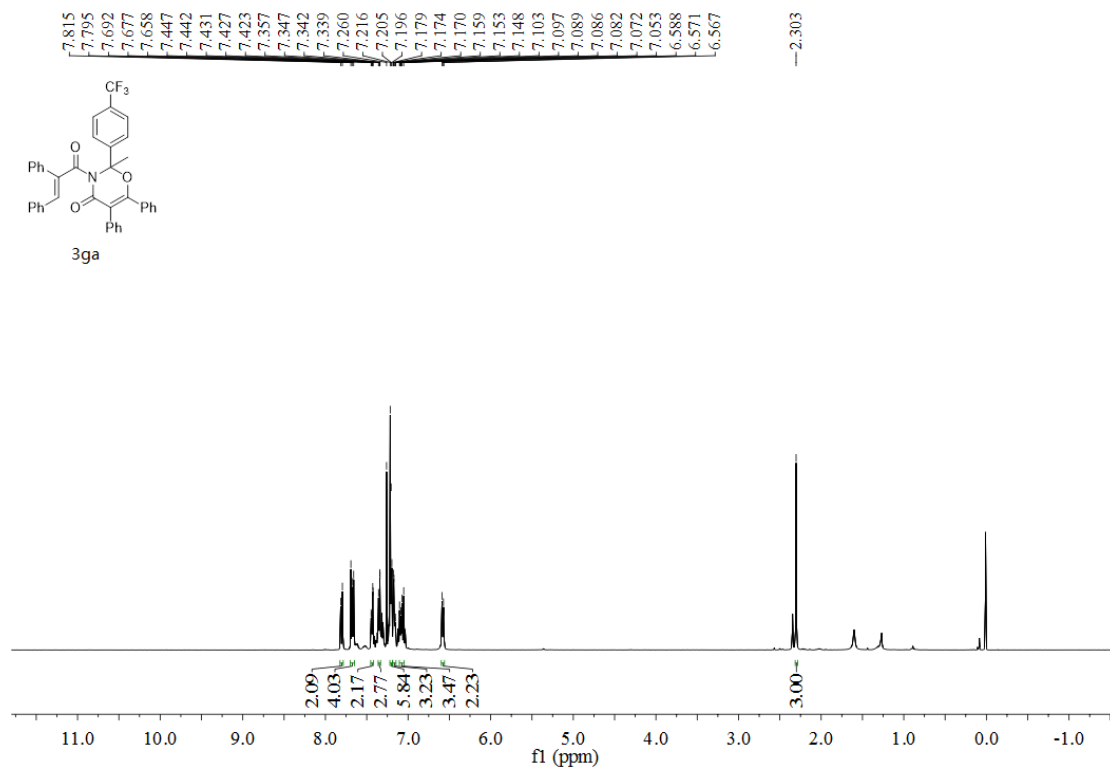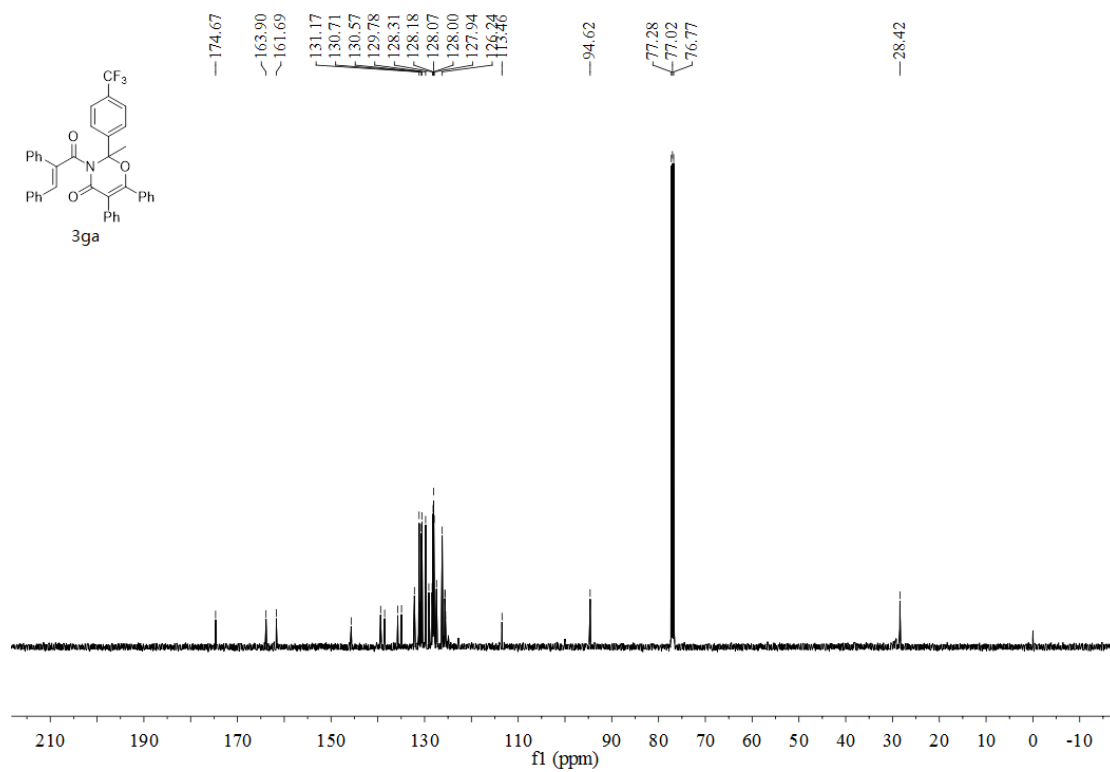

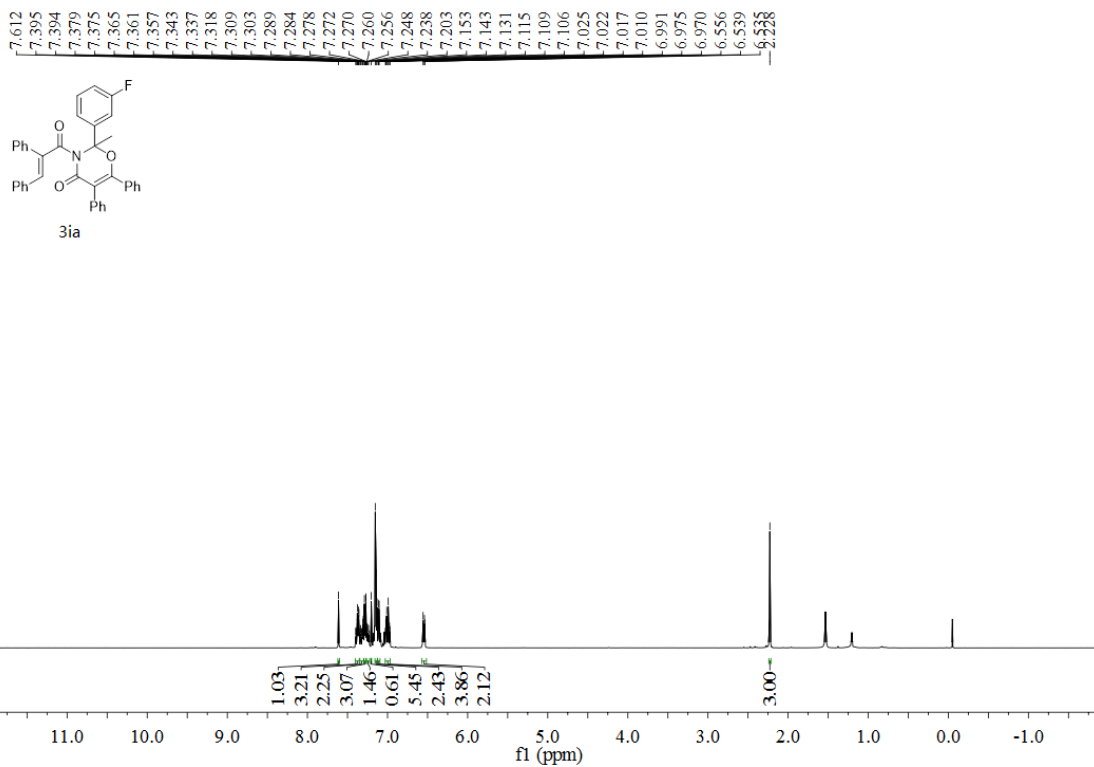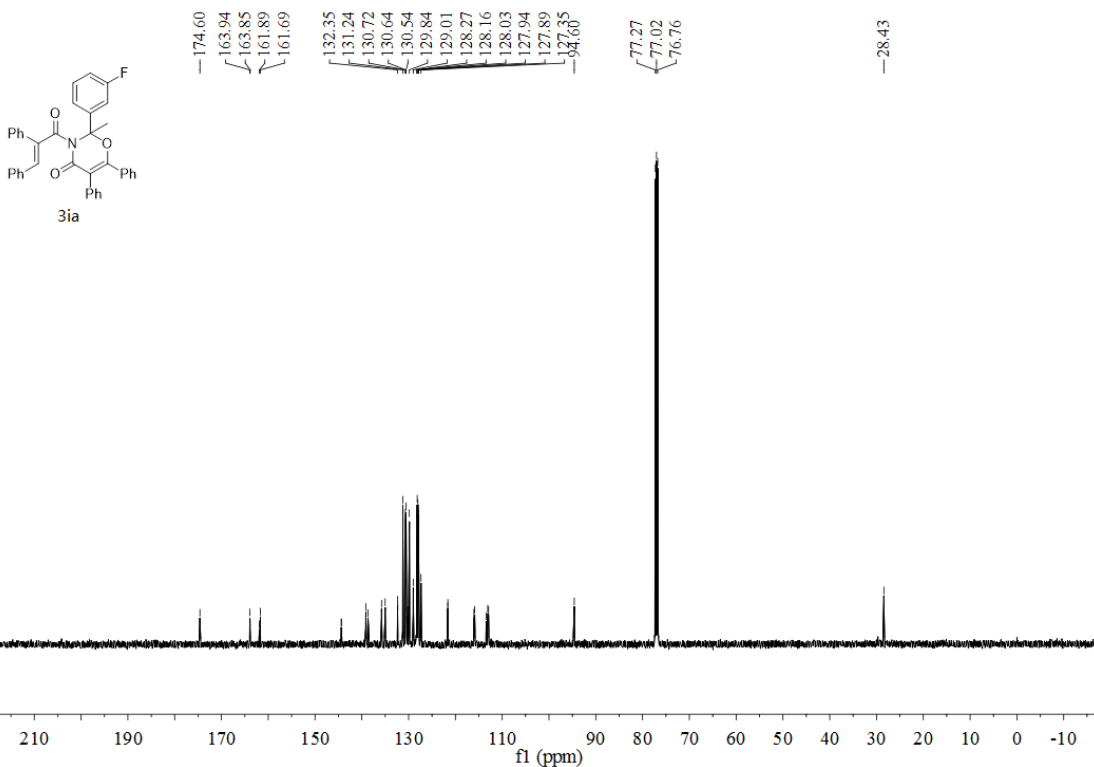

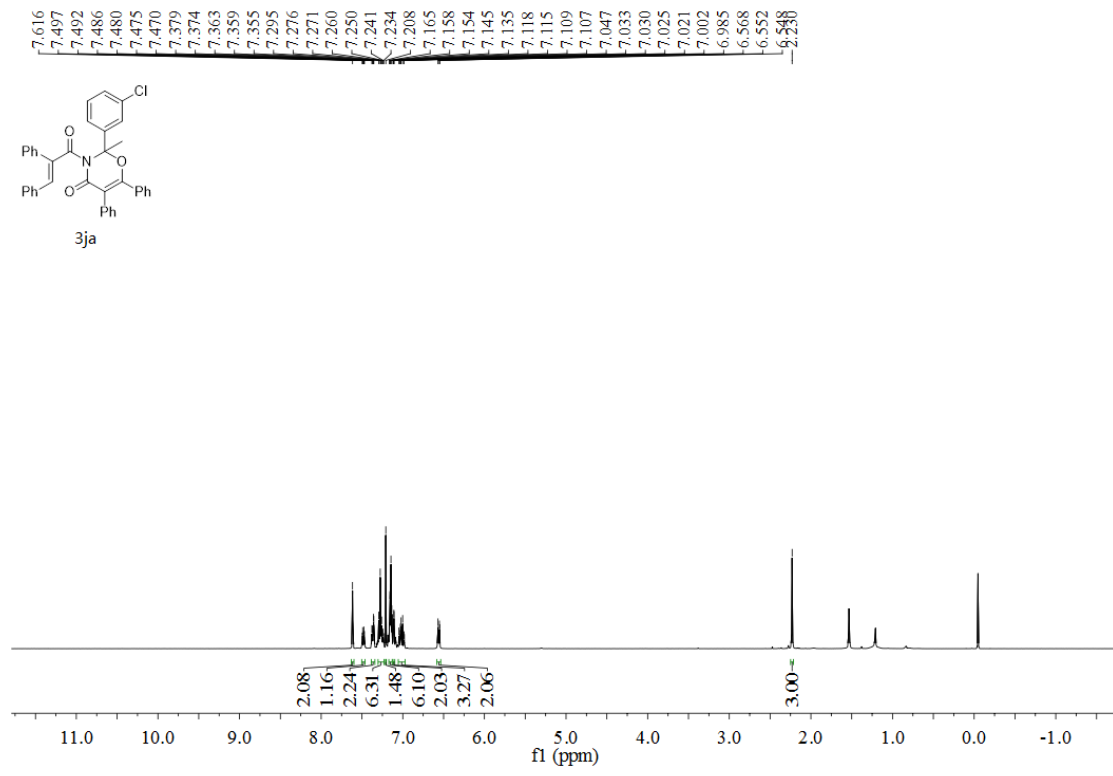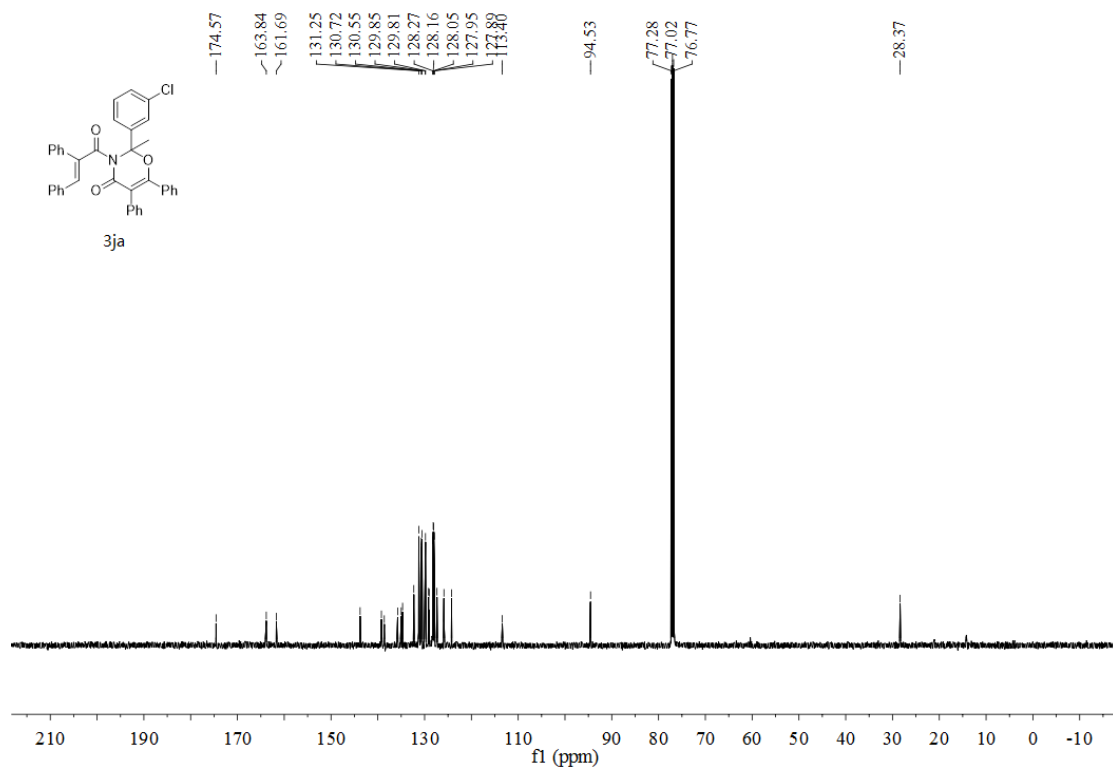

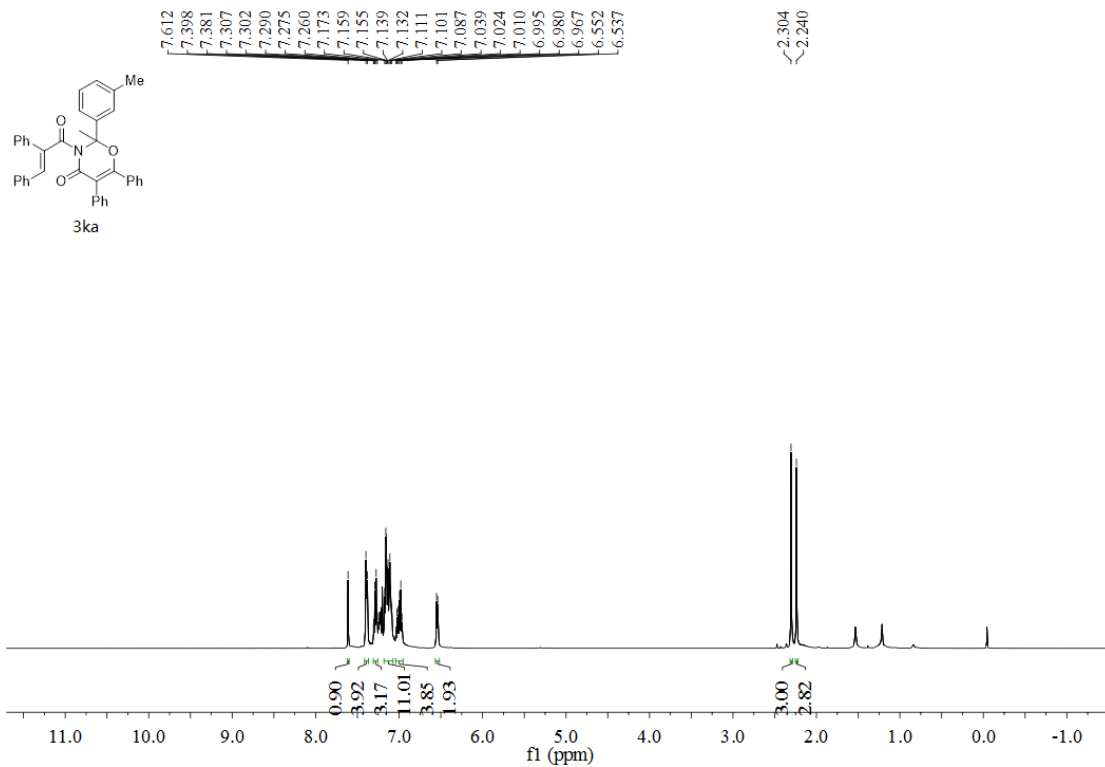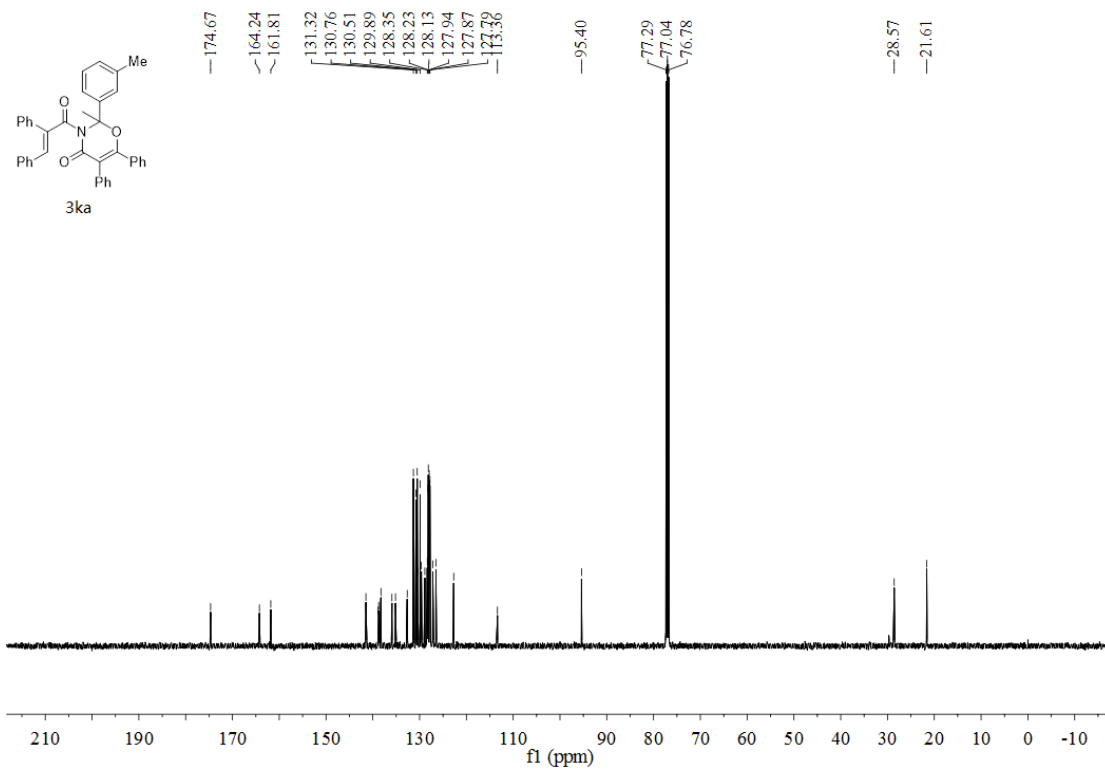

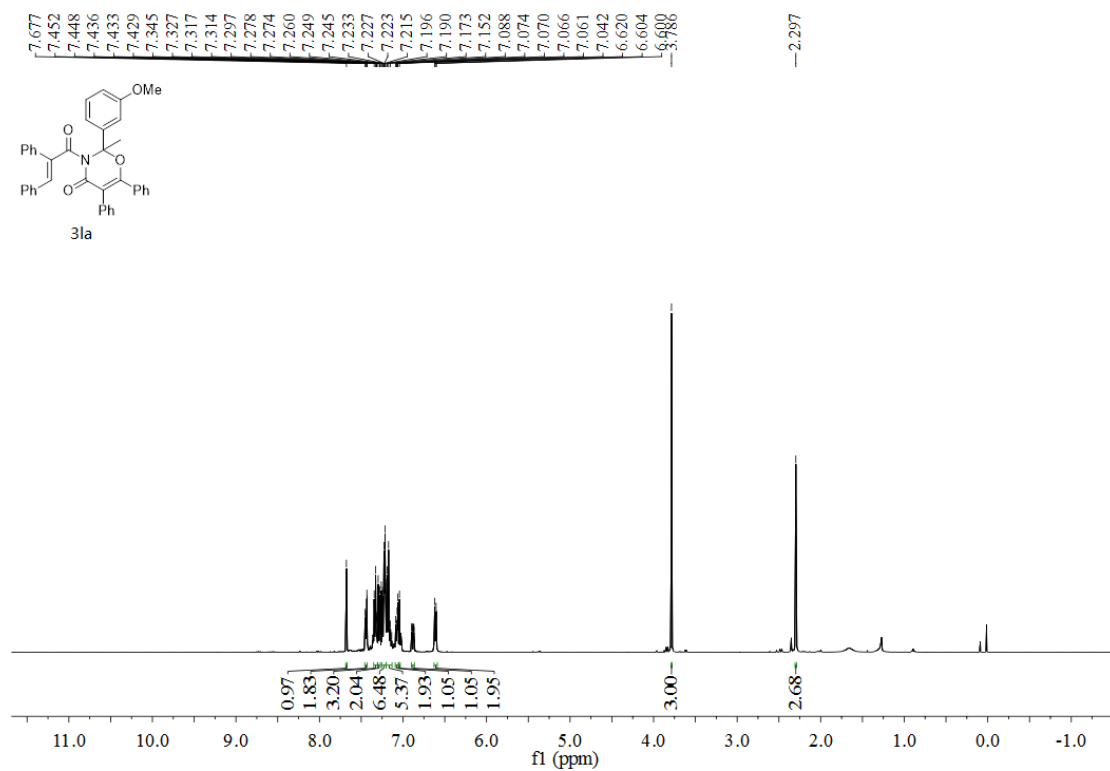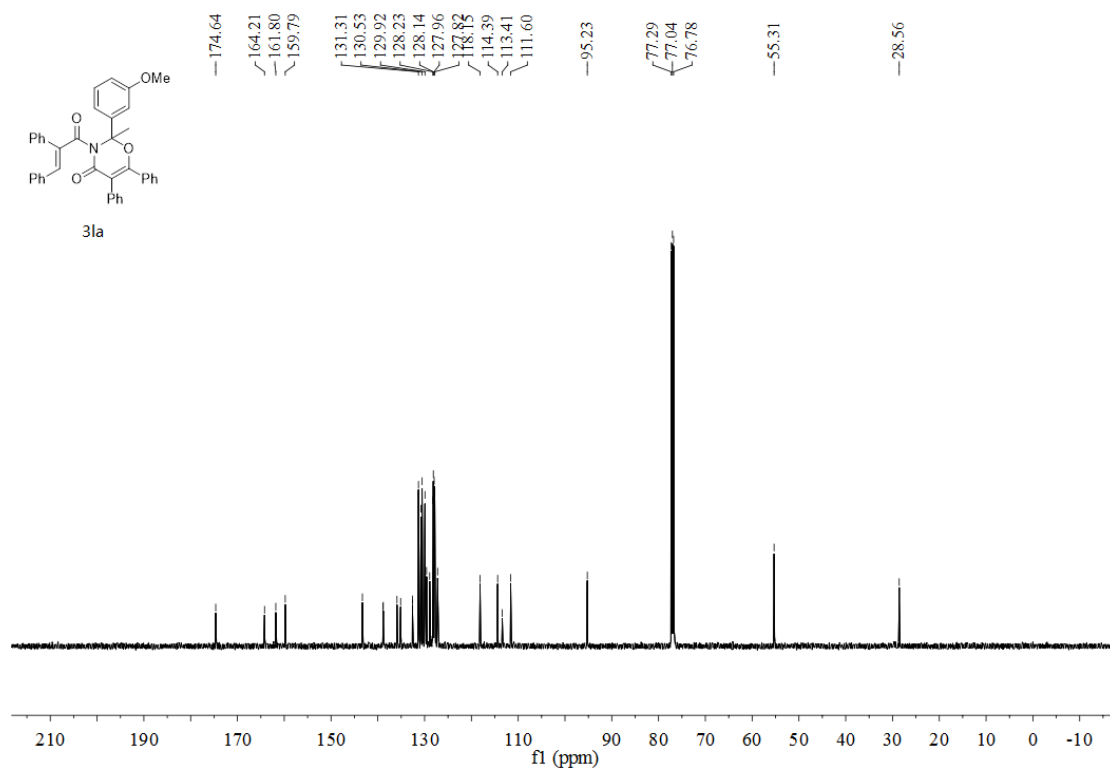



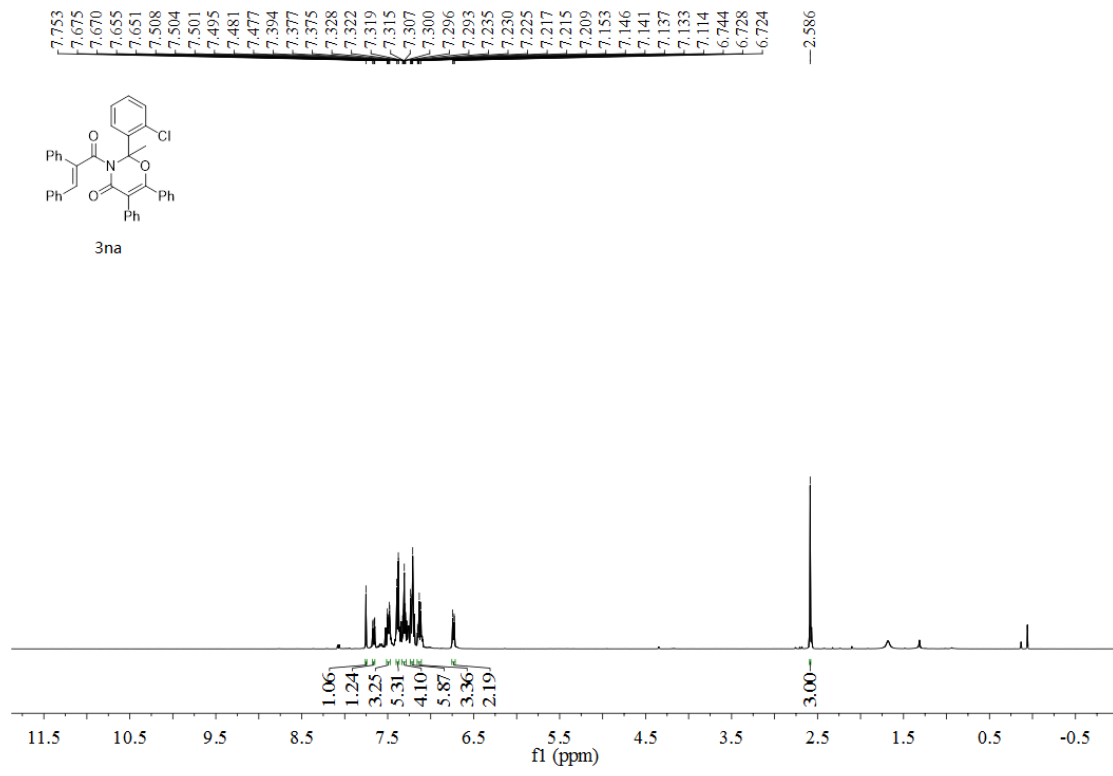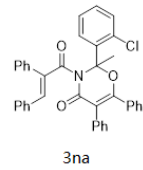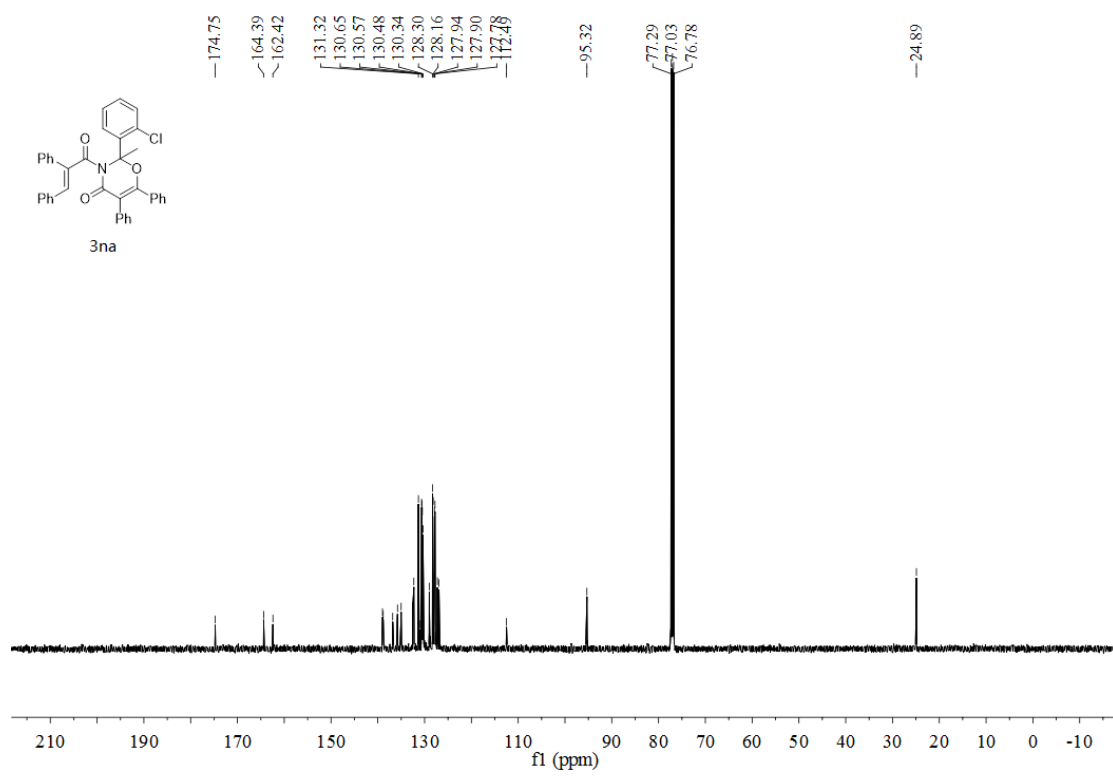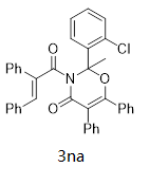



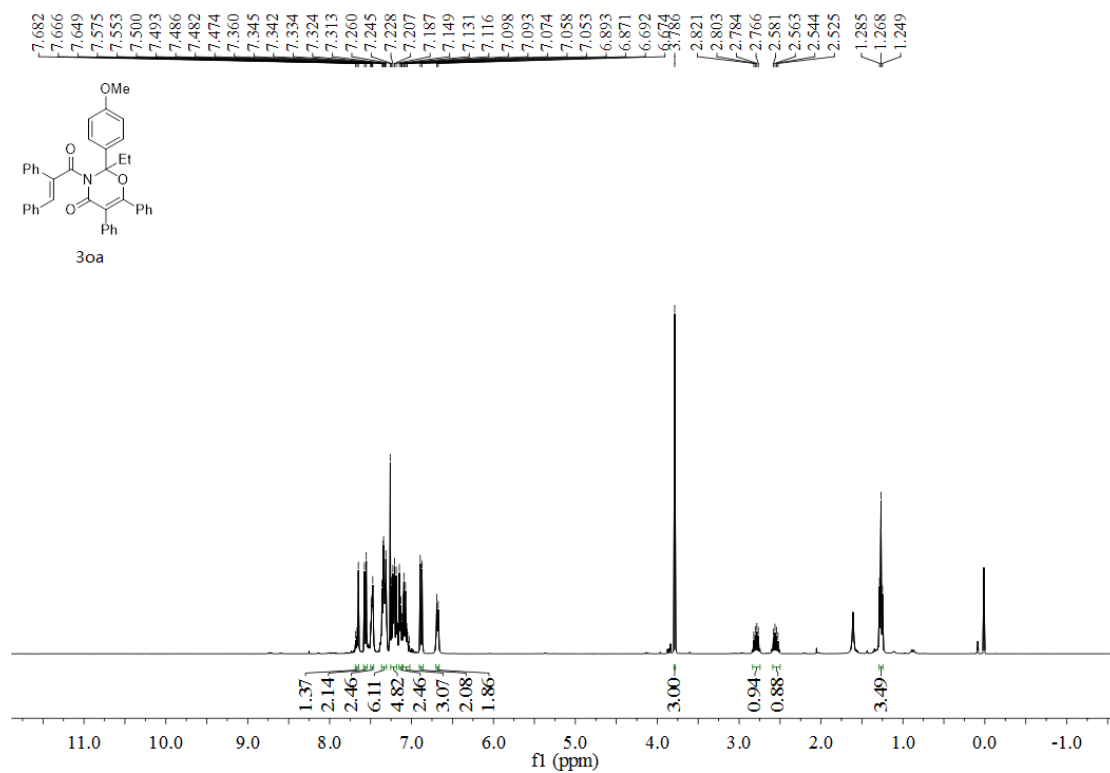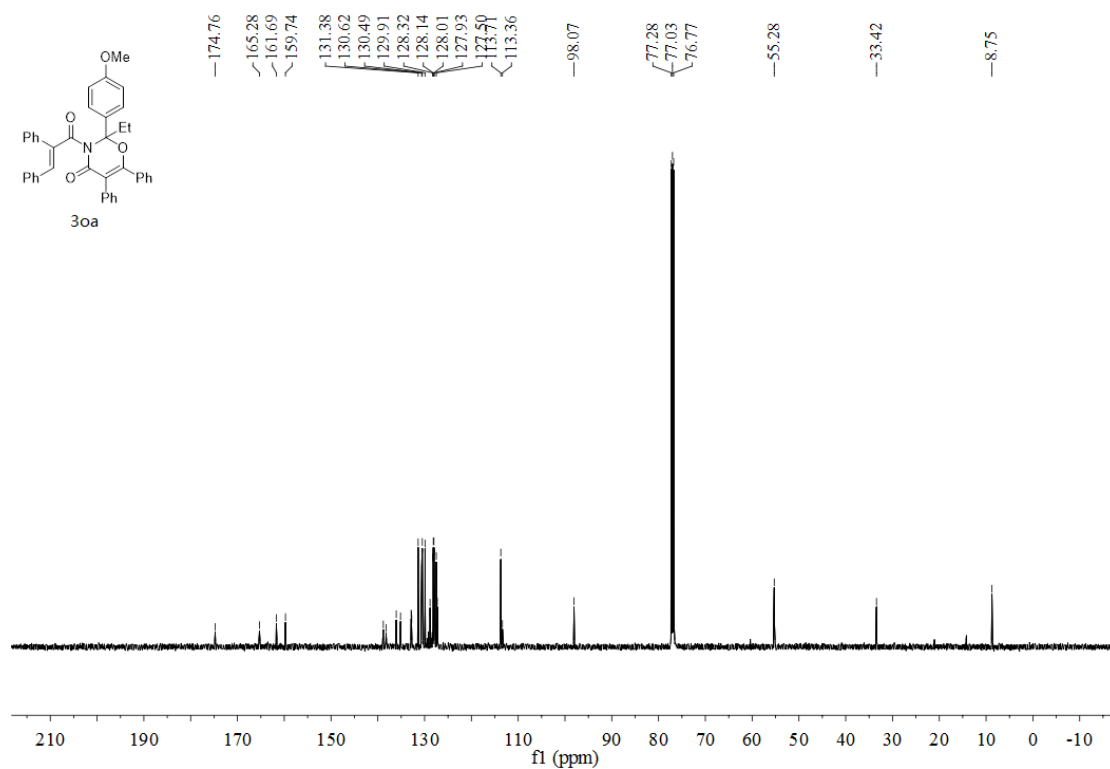

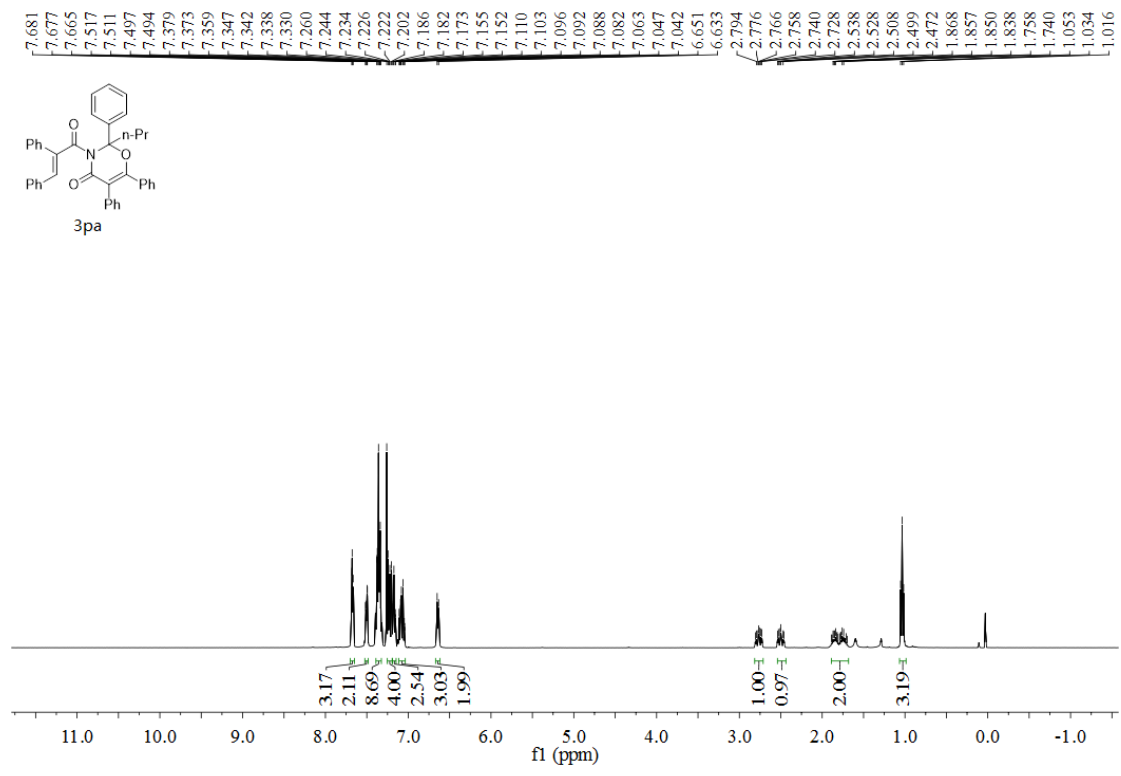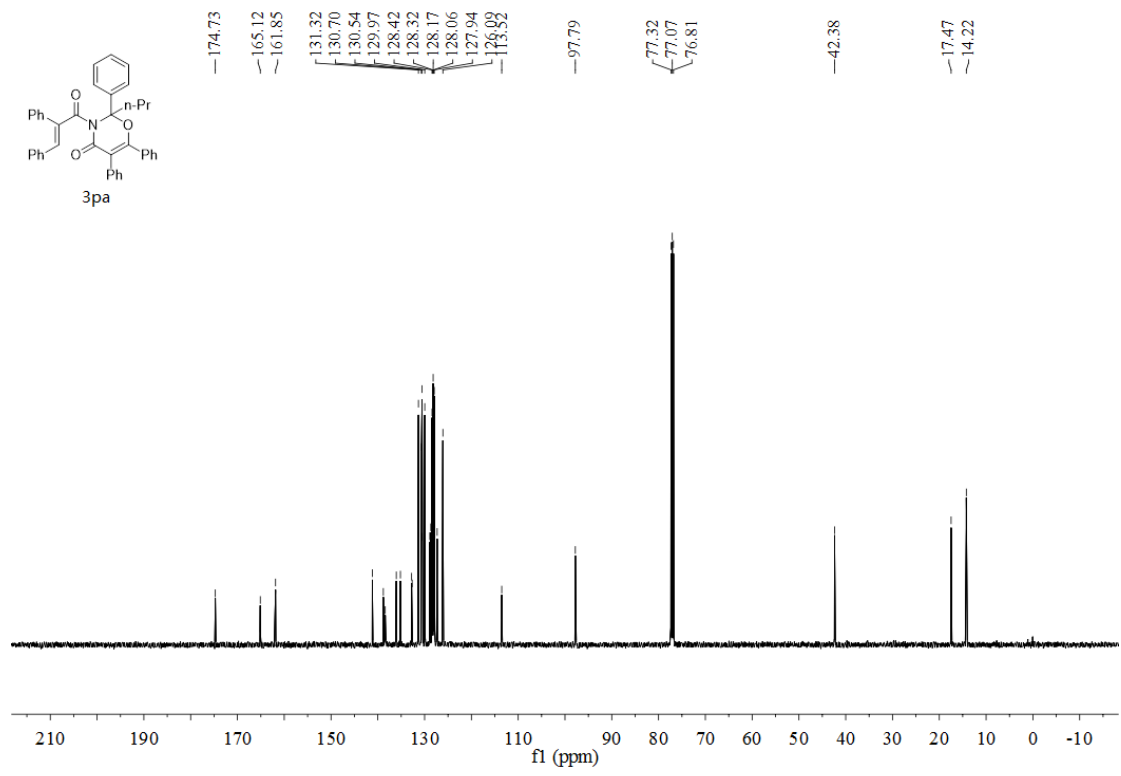

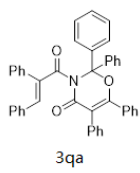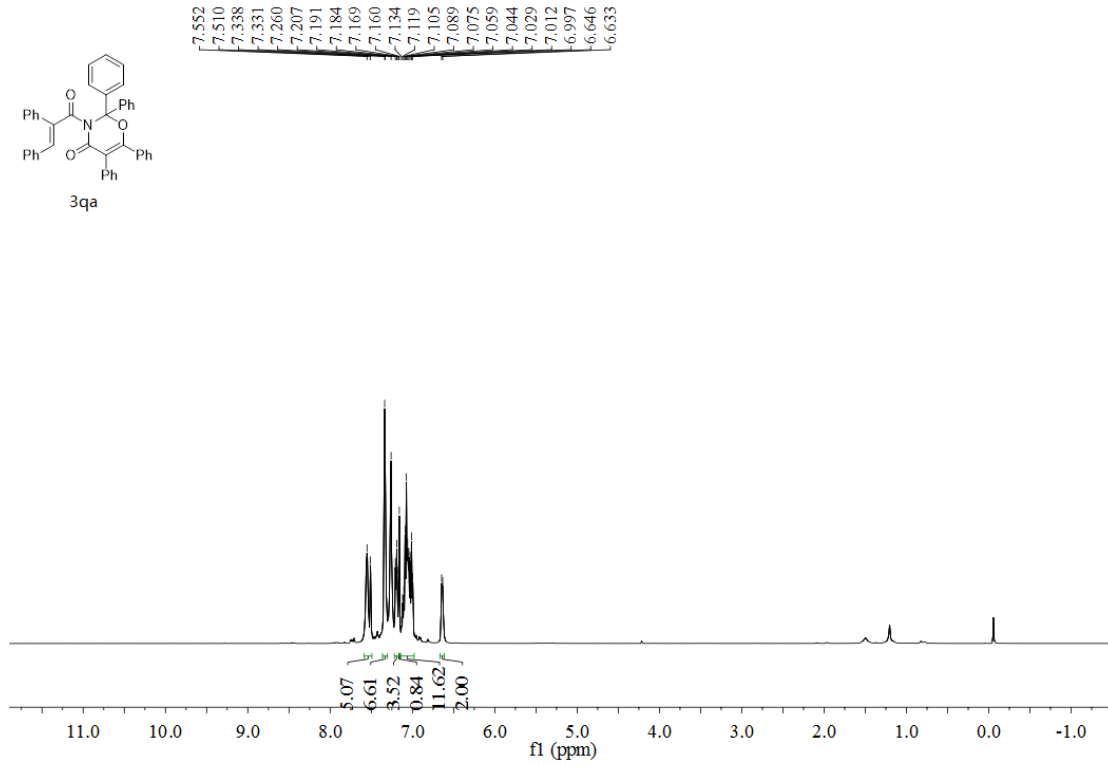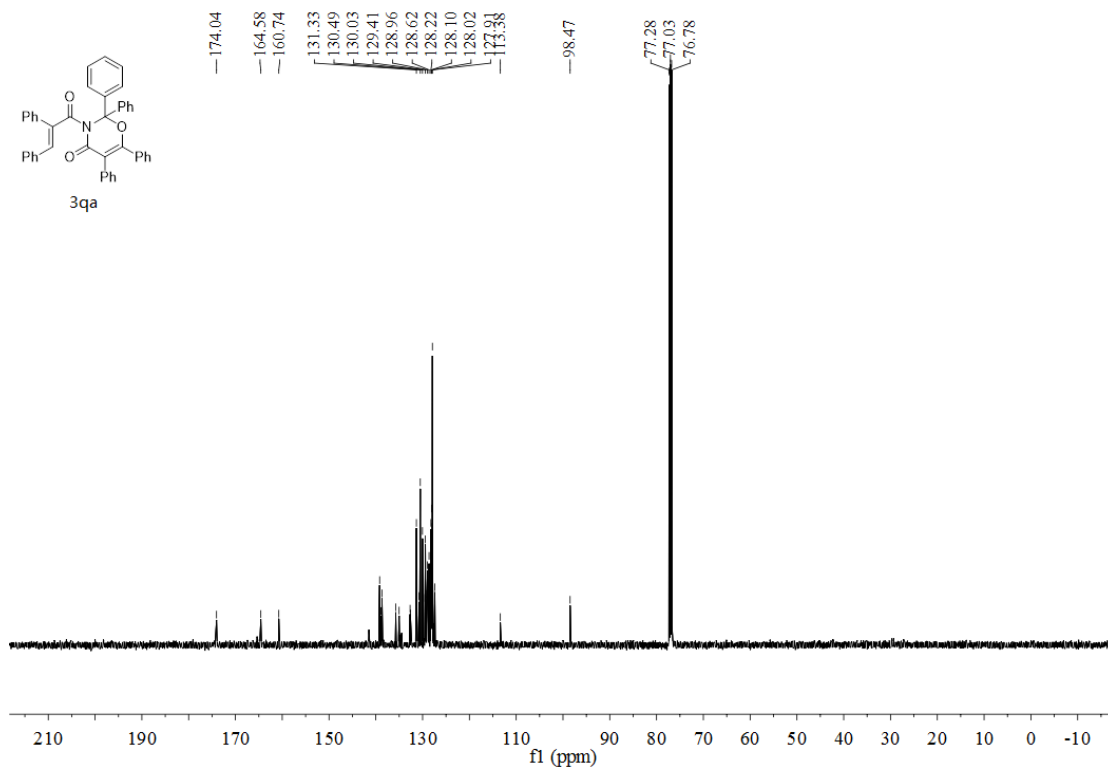

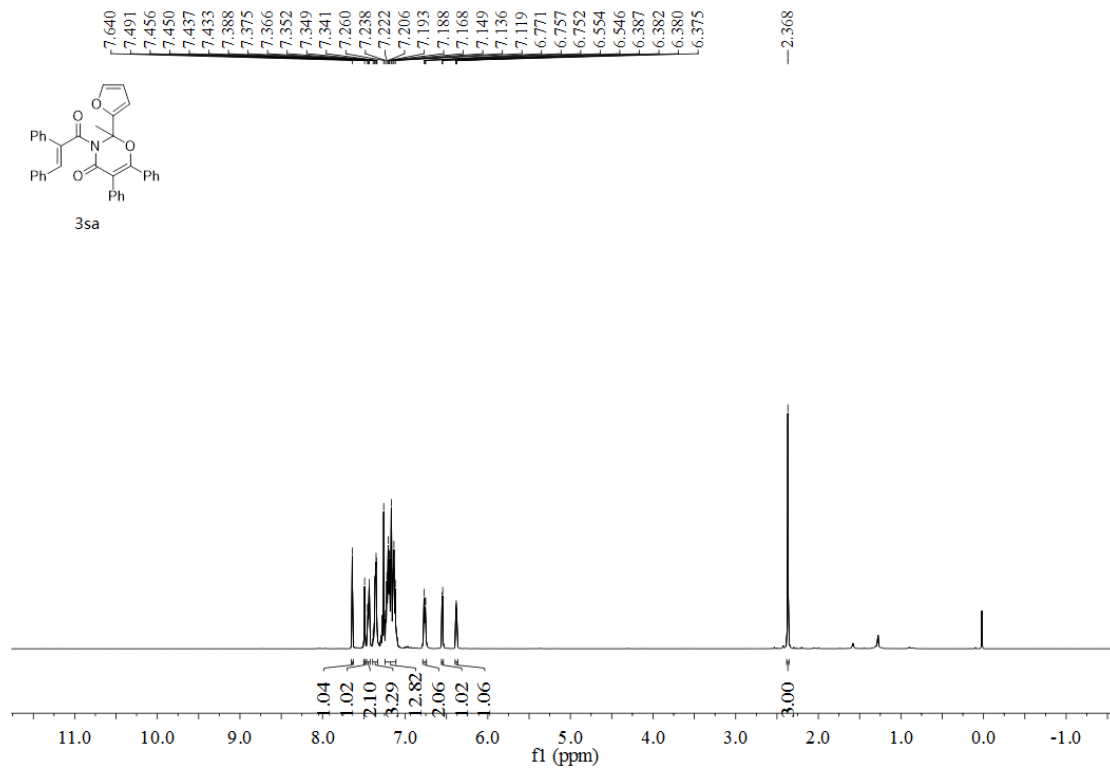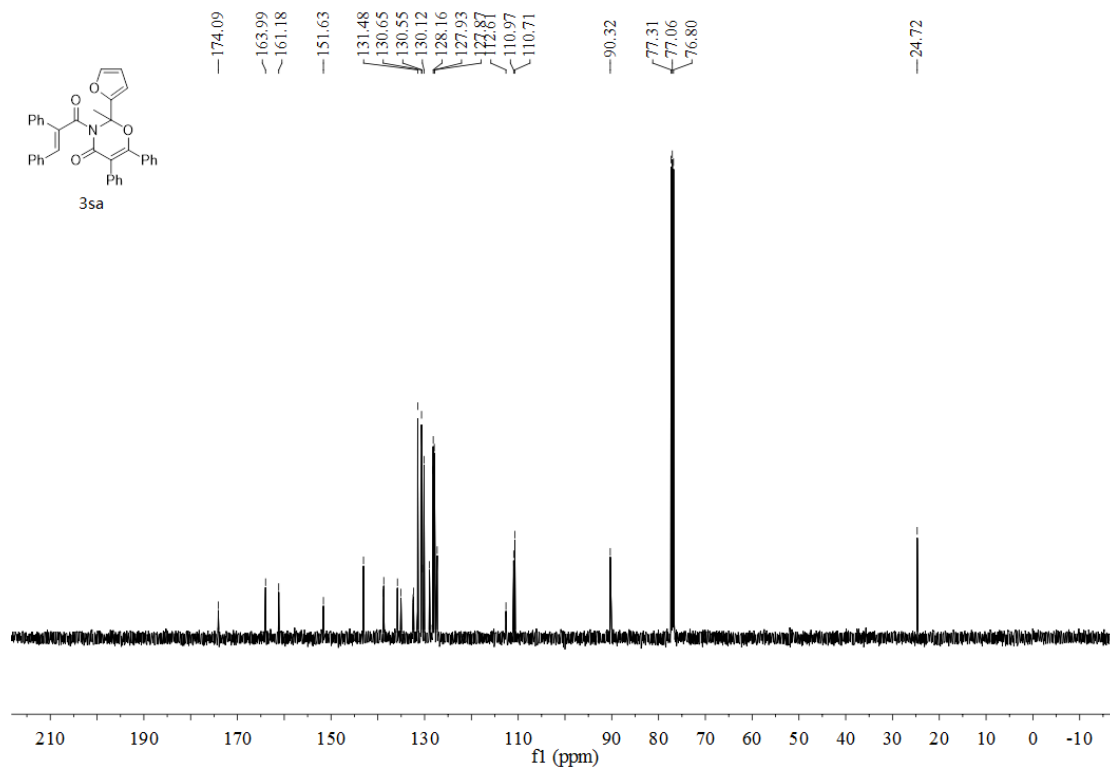

7.669  
7.456  
7.451  
7.449  
7.446  
7.441  
7.437  
7.432  
7.380  
7.376  
7.367  
7.363  
7.358  
7.352  
7.349  
7.340  
7.324  
7.321  
7.311  
7.308  
7.298  
7.294  
7.288  
7.285  
7.274  
7.260  
7.256  
7.252  
7.242  
7.220  
7.216  
7.211  
7.206  
7.197  
7.196  
7.192  
7.181  
7.178  
7.174  
7.128  
7.127  
7.120  
7.116  
7.109  
7.098  
7.090  
7.075  
6.951  
6.942  
6.939  
6.930  
6.735  
6.732  
6.716  
6.712  
2.419

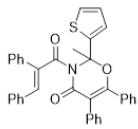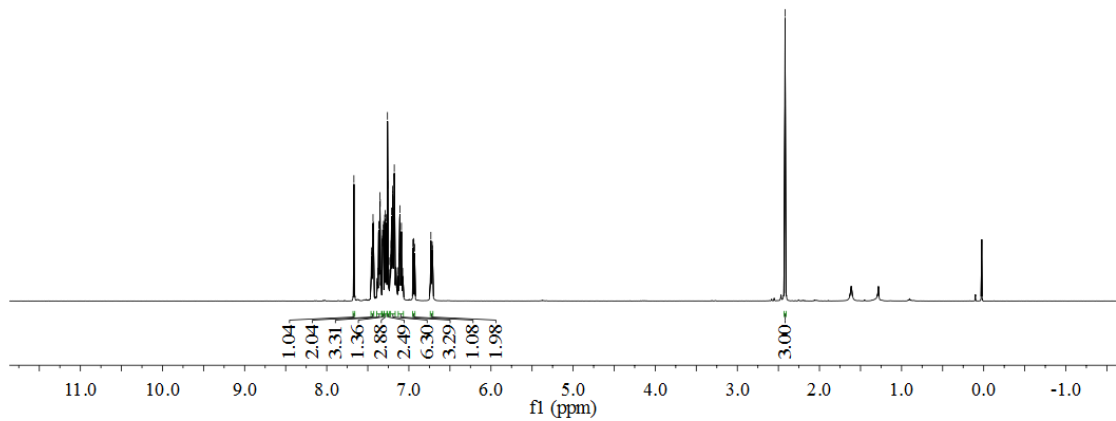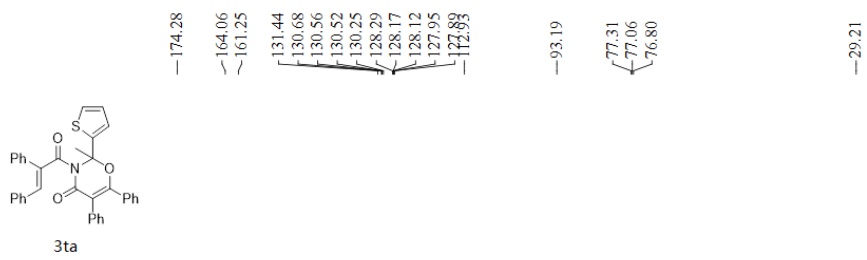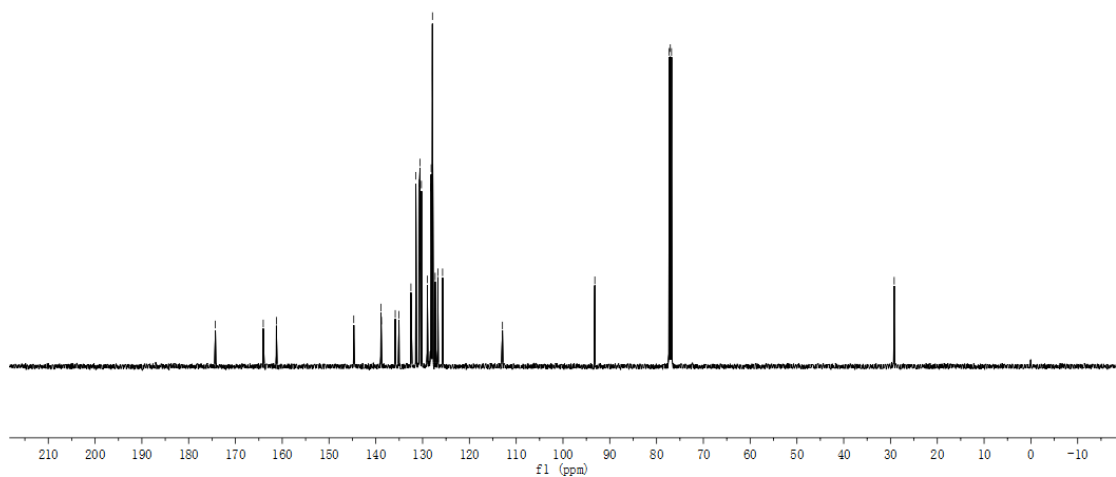



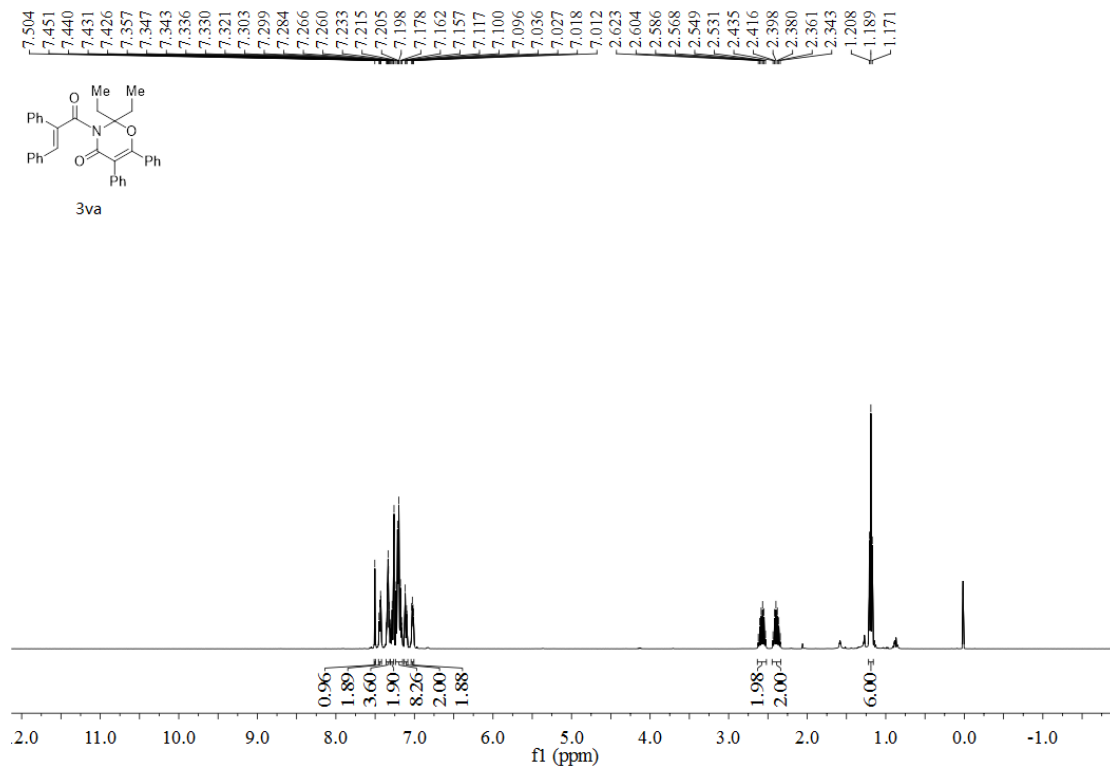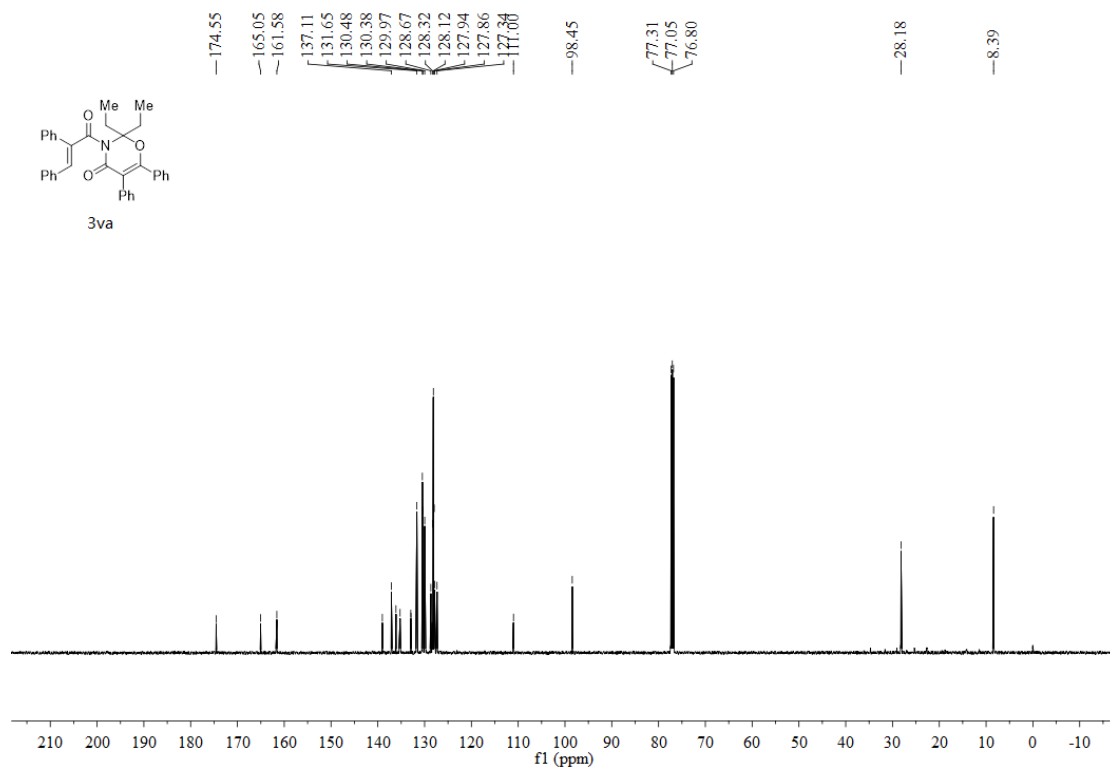

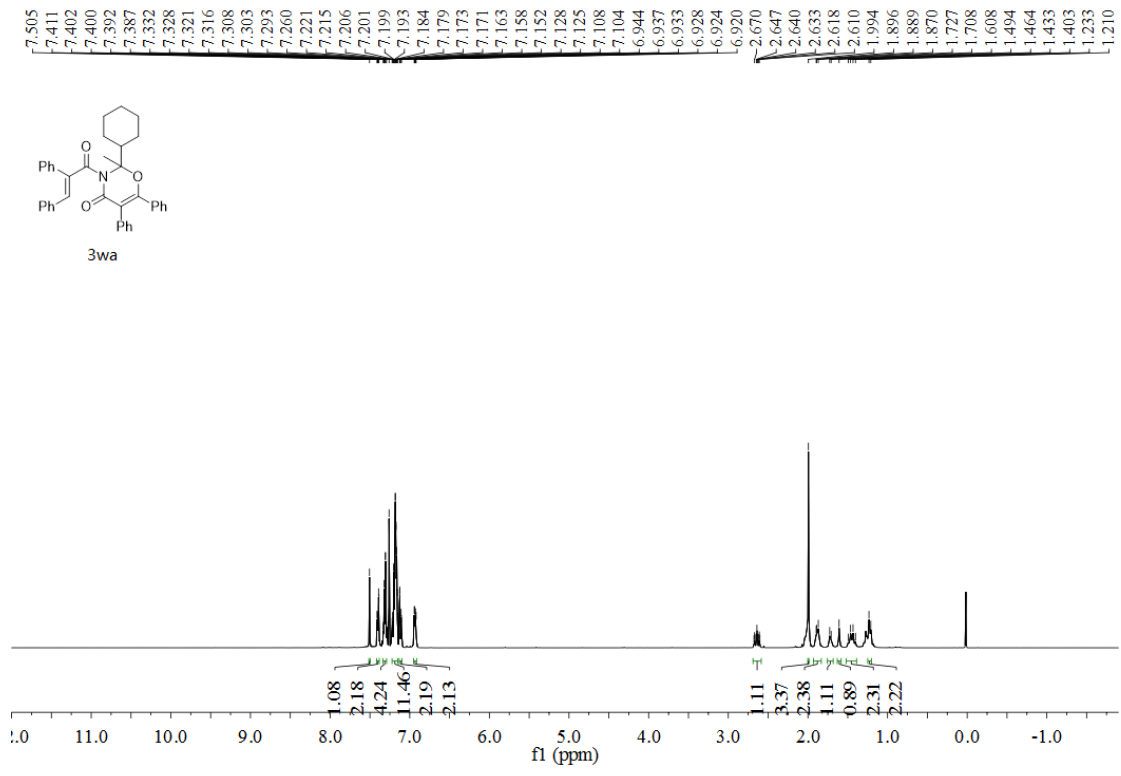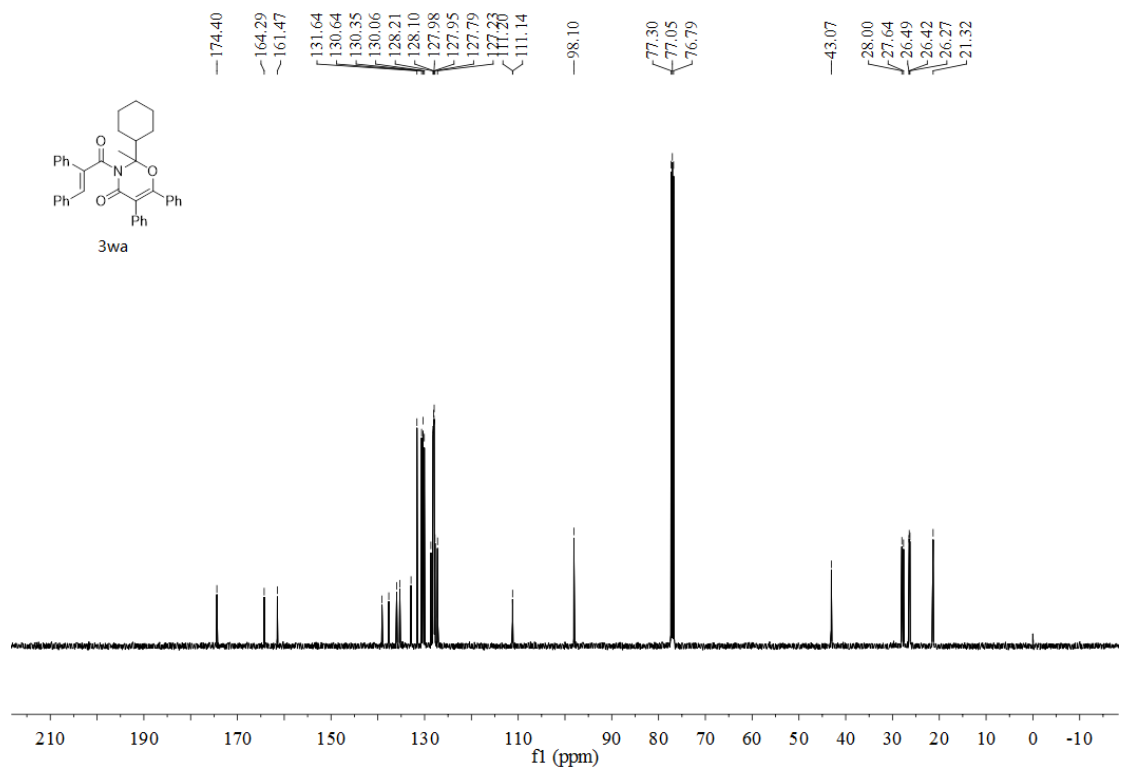



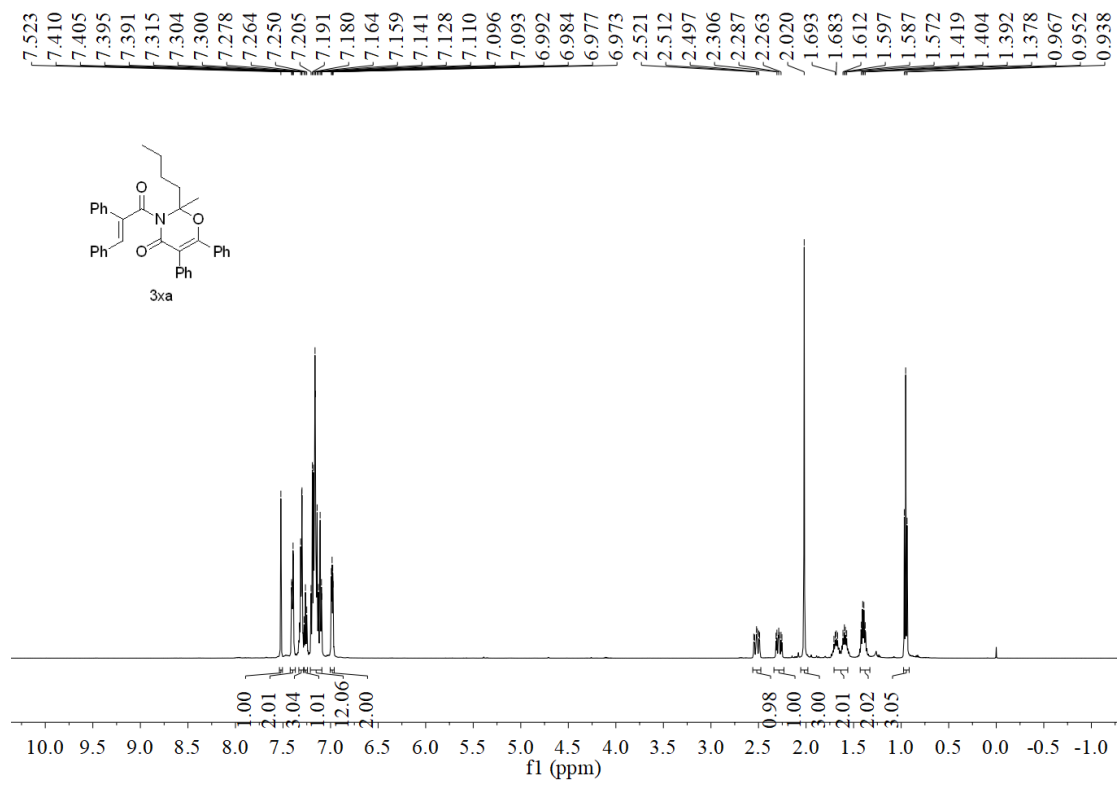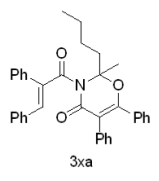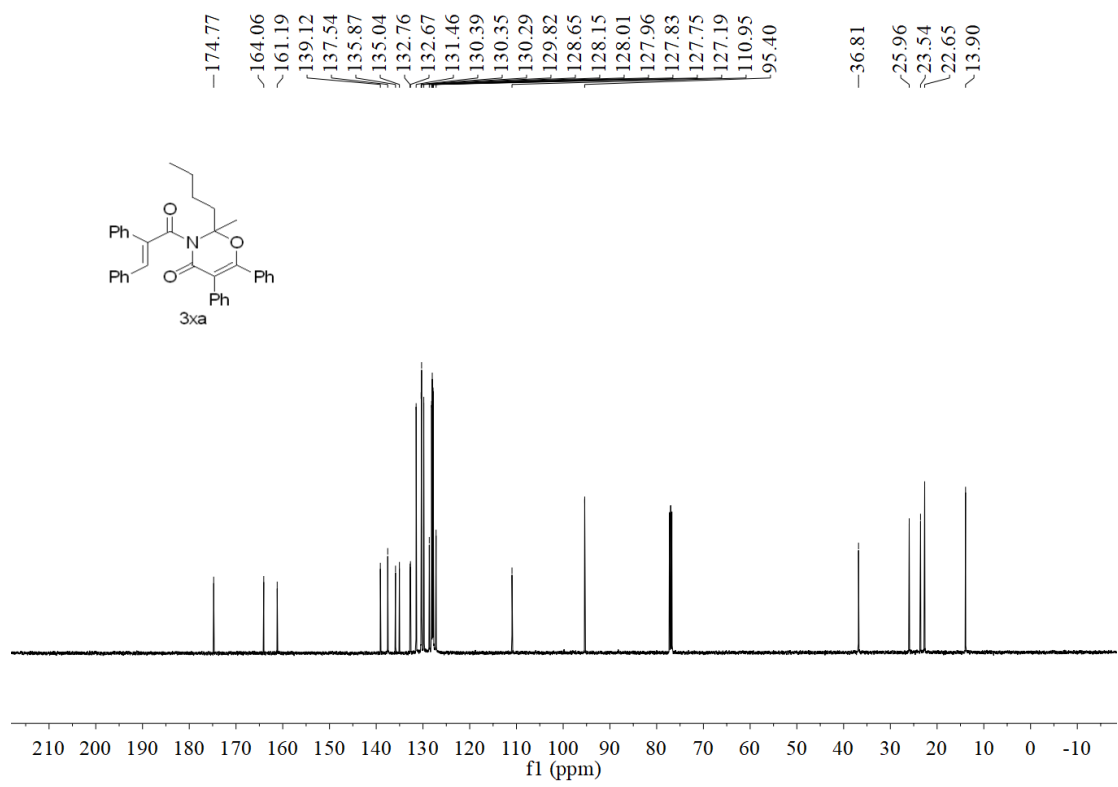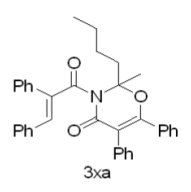

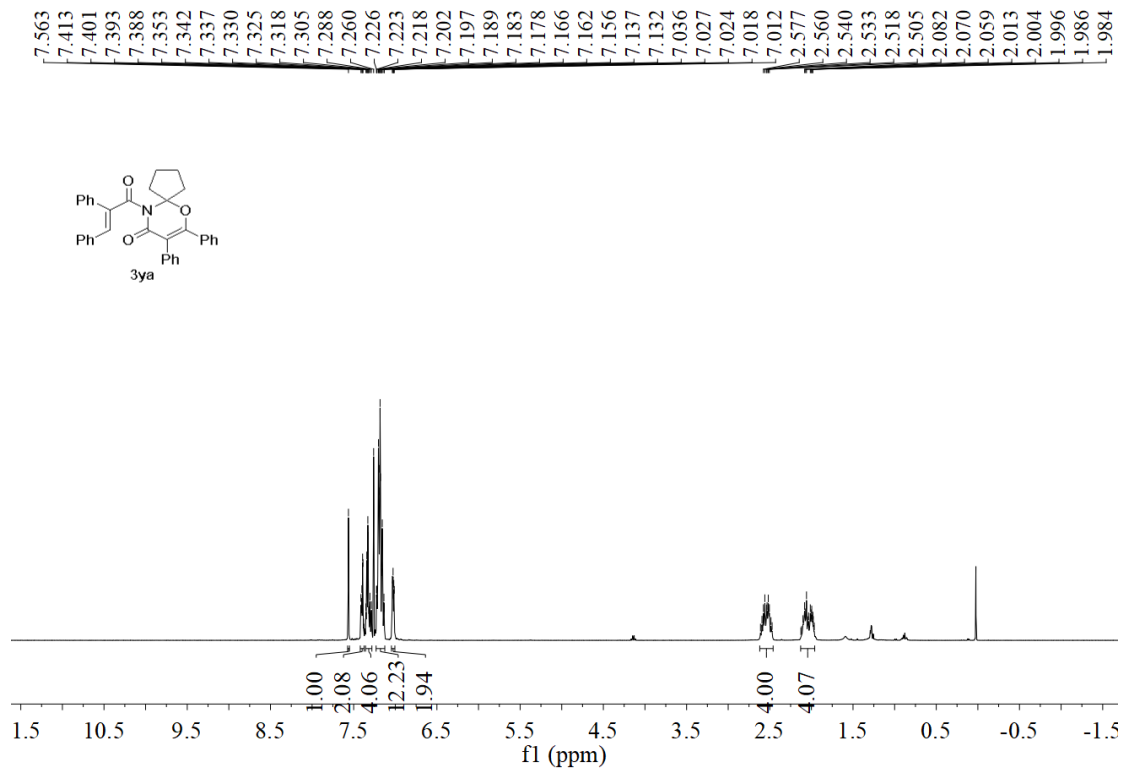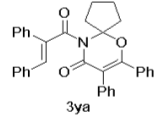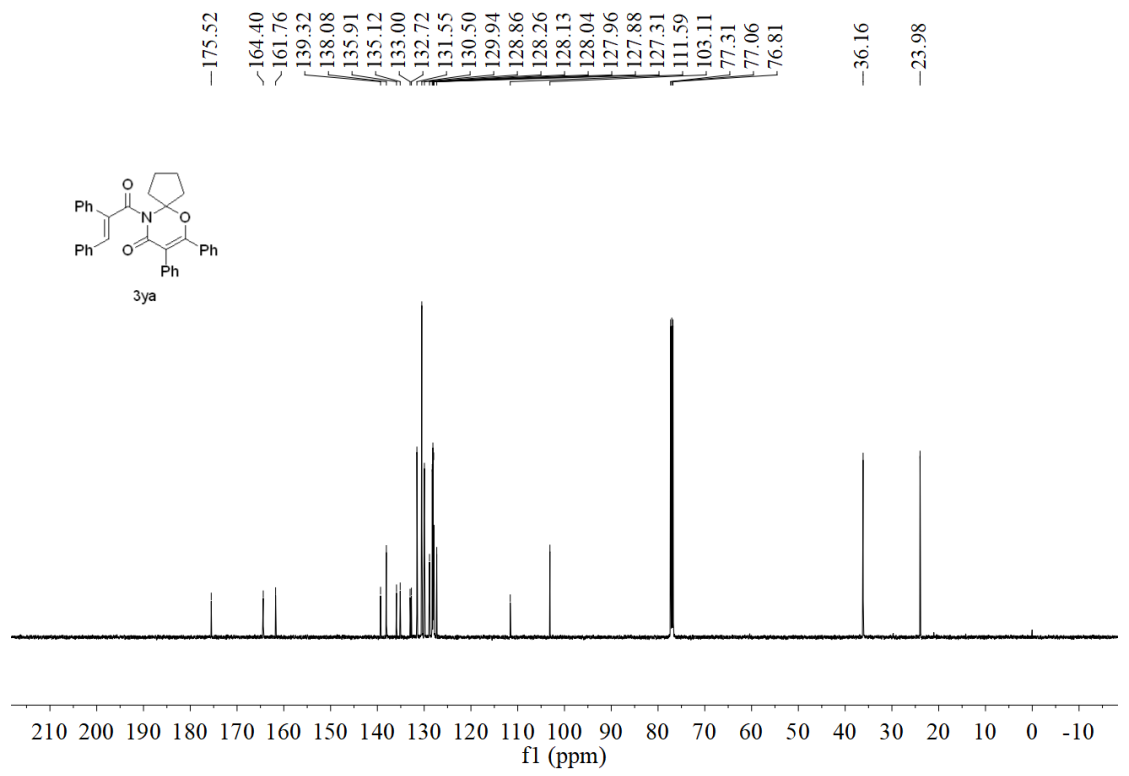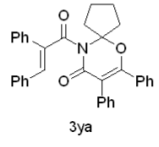

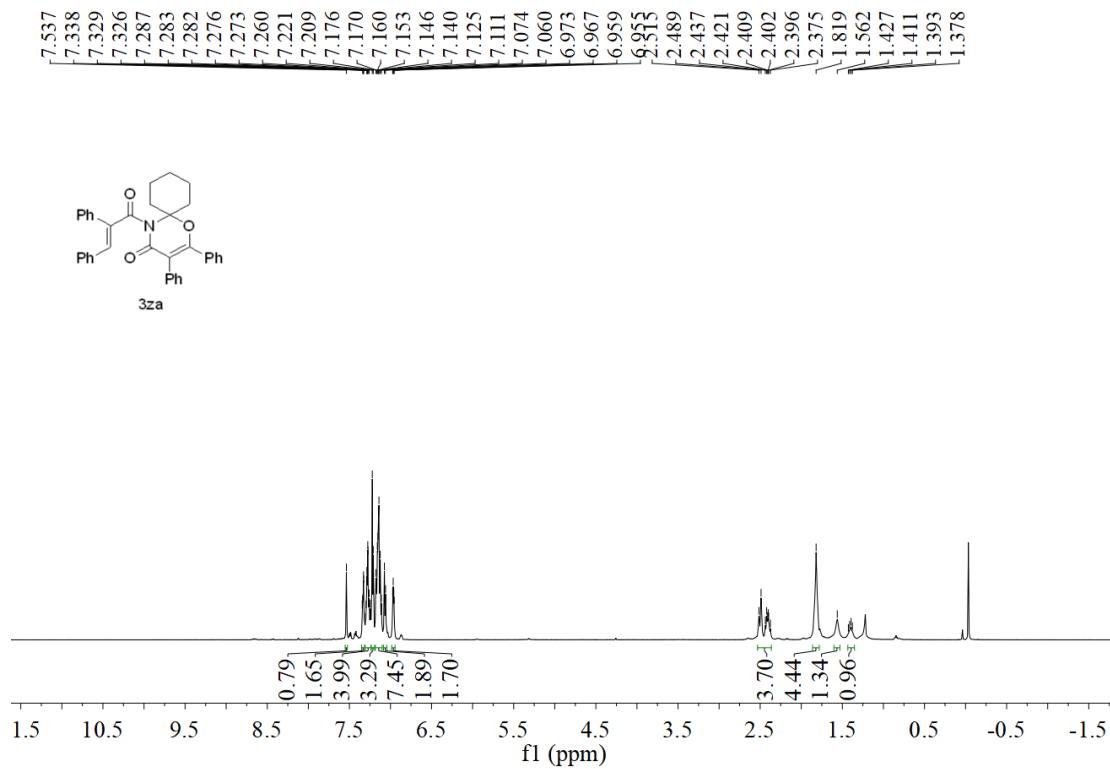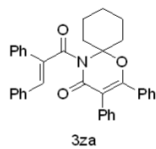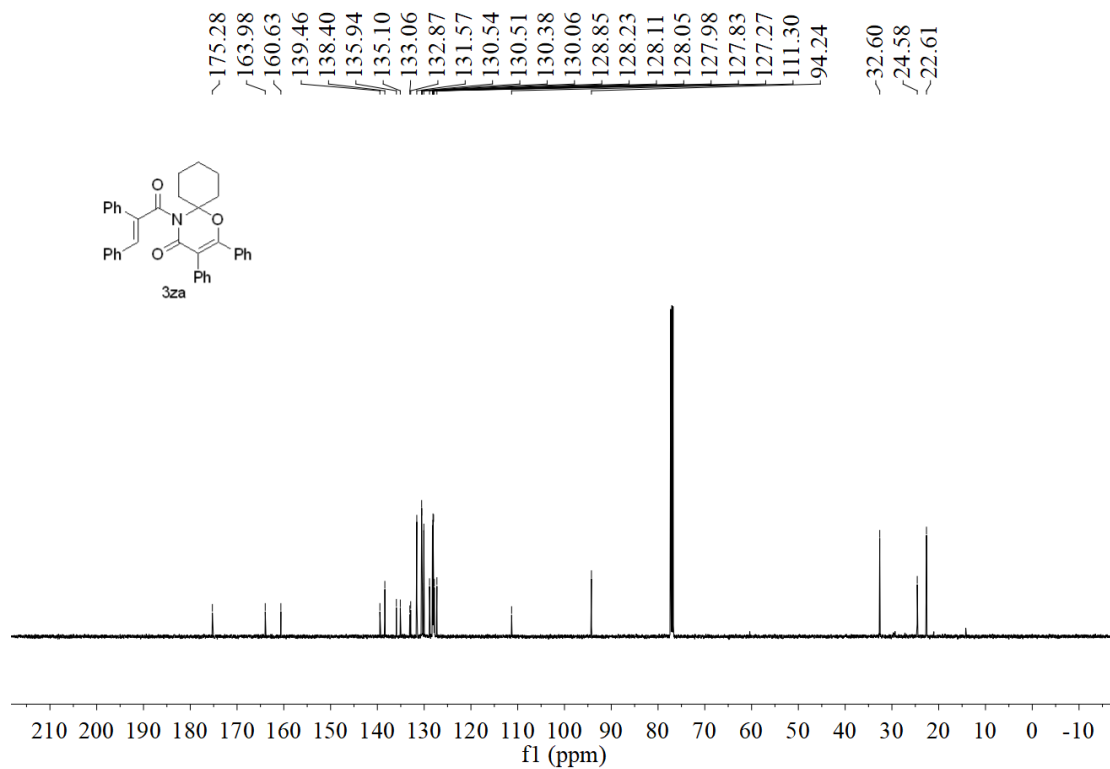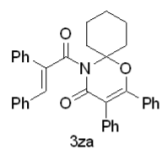

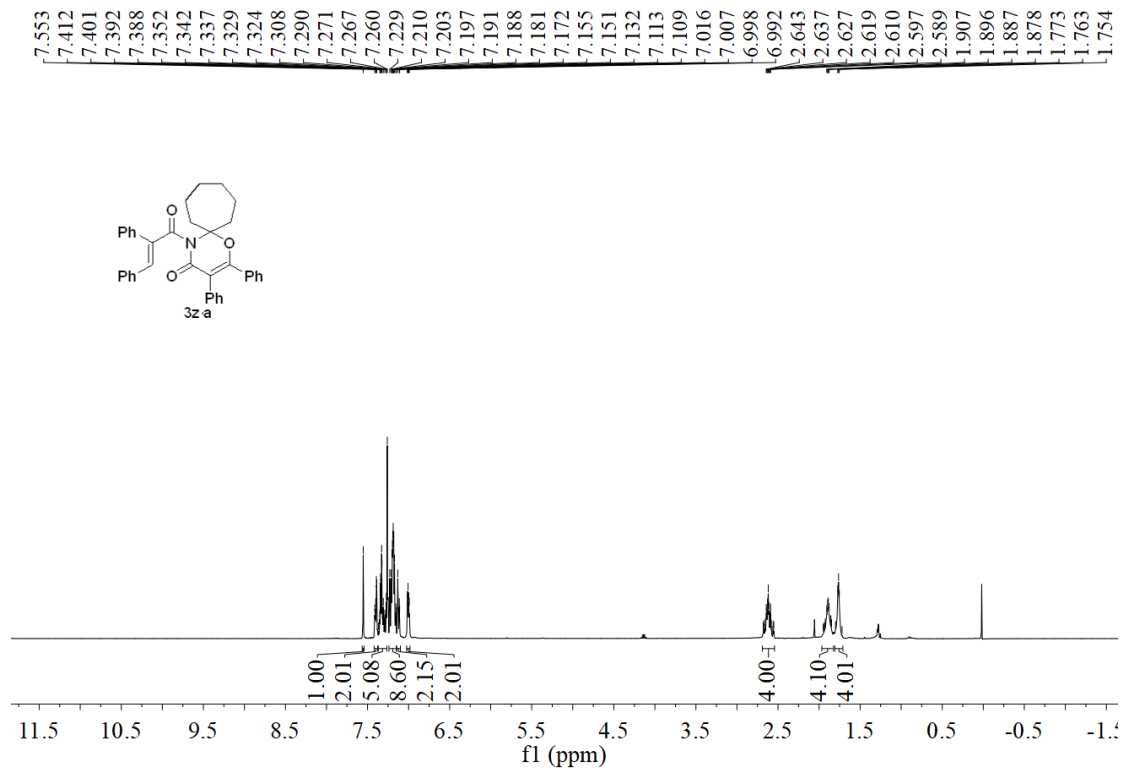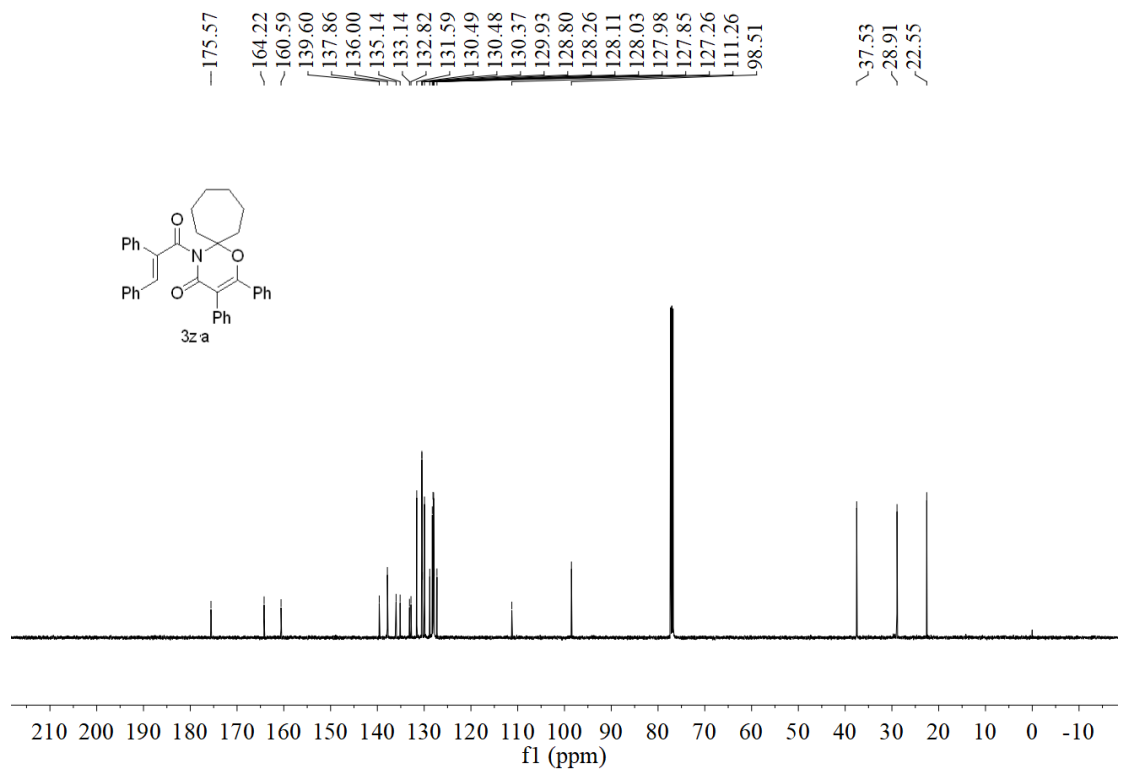

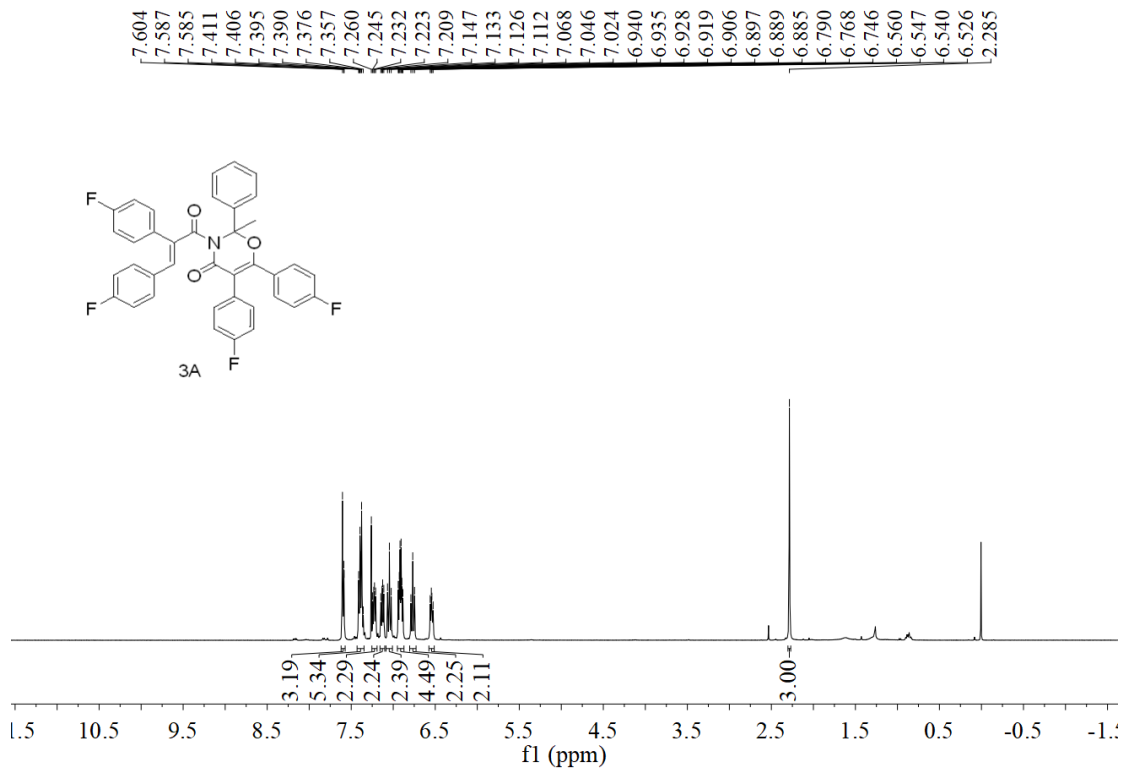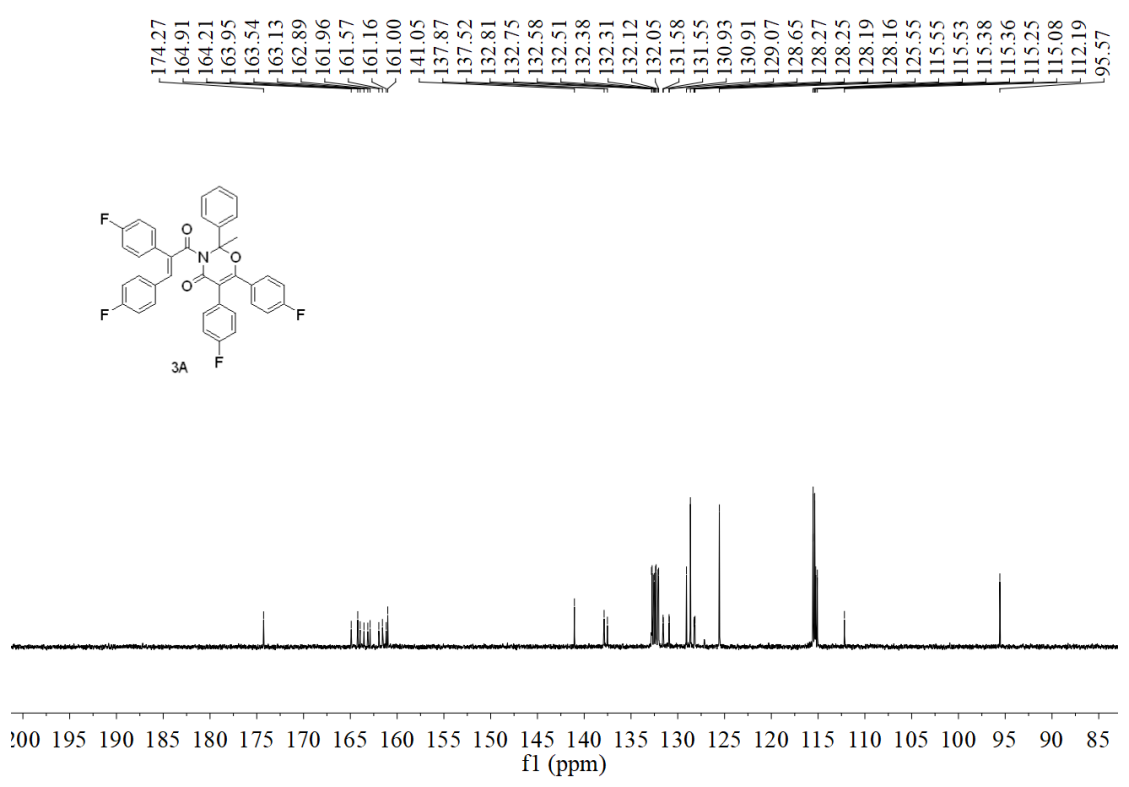

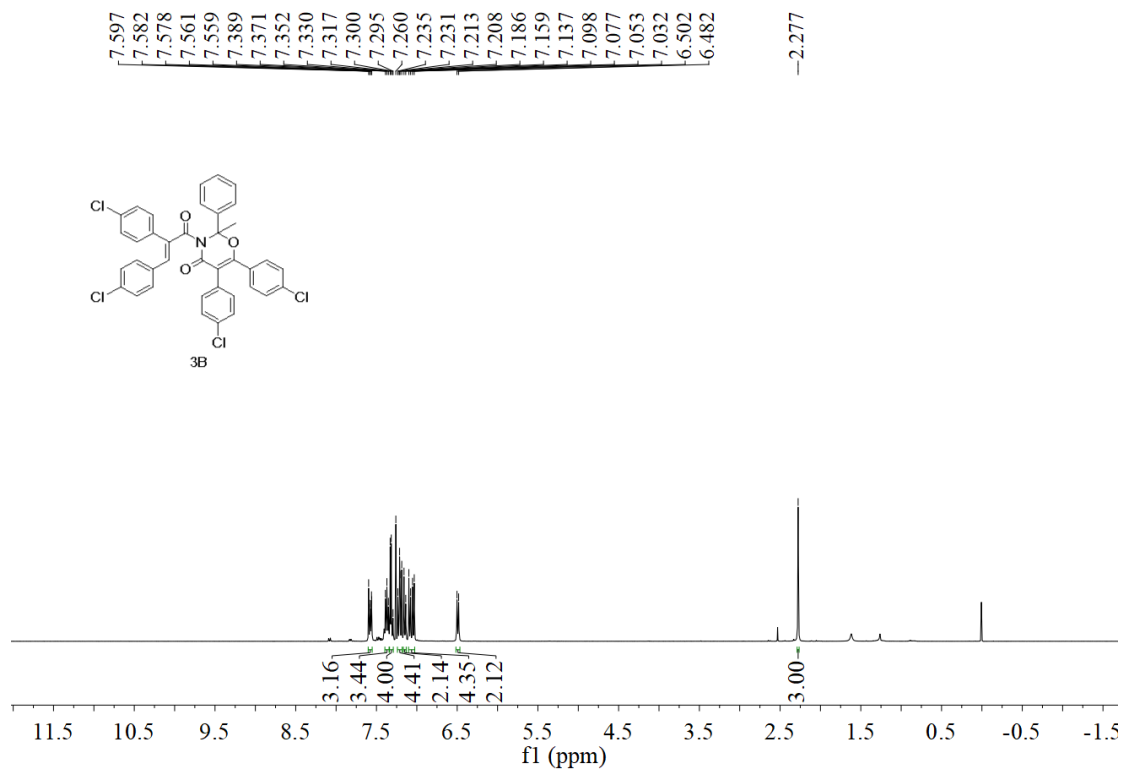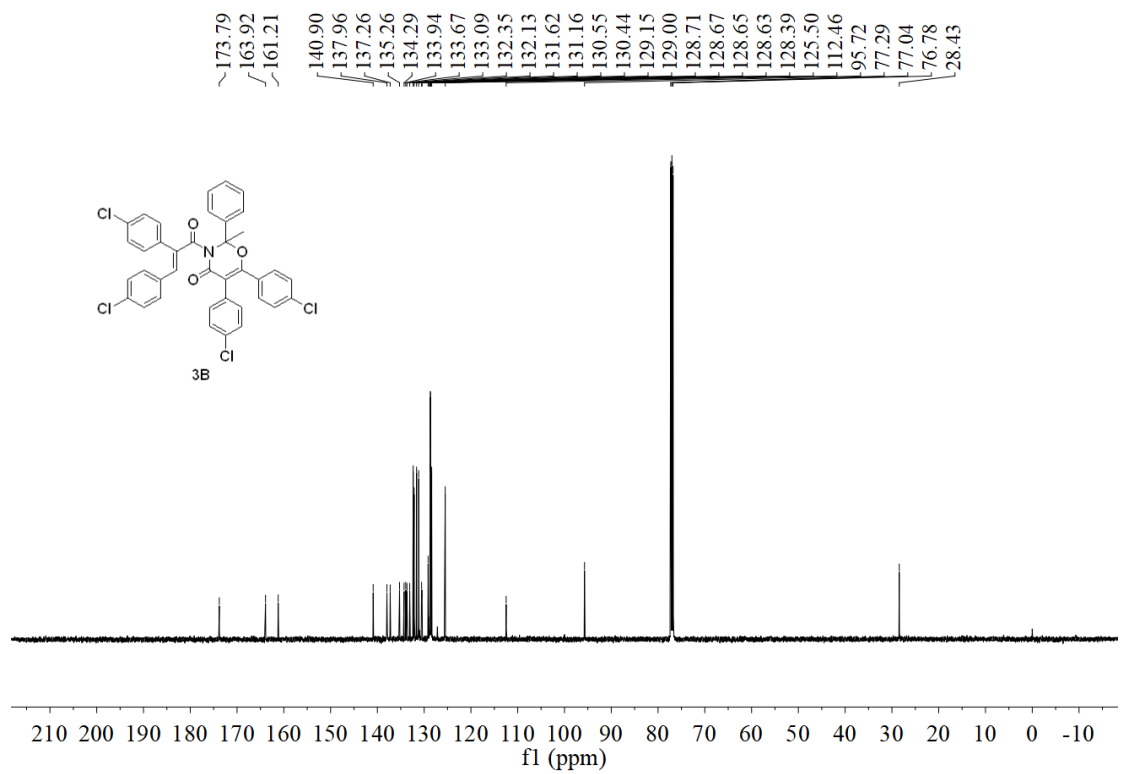

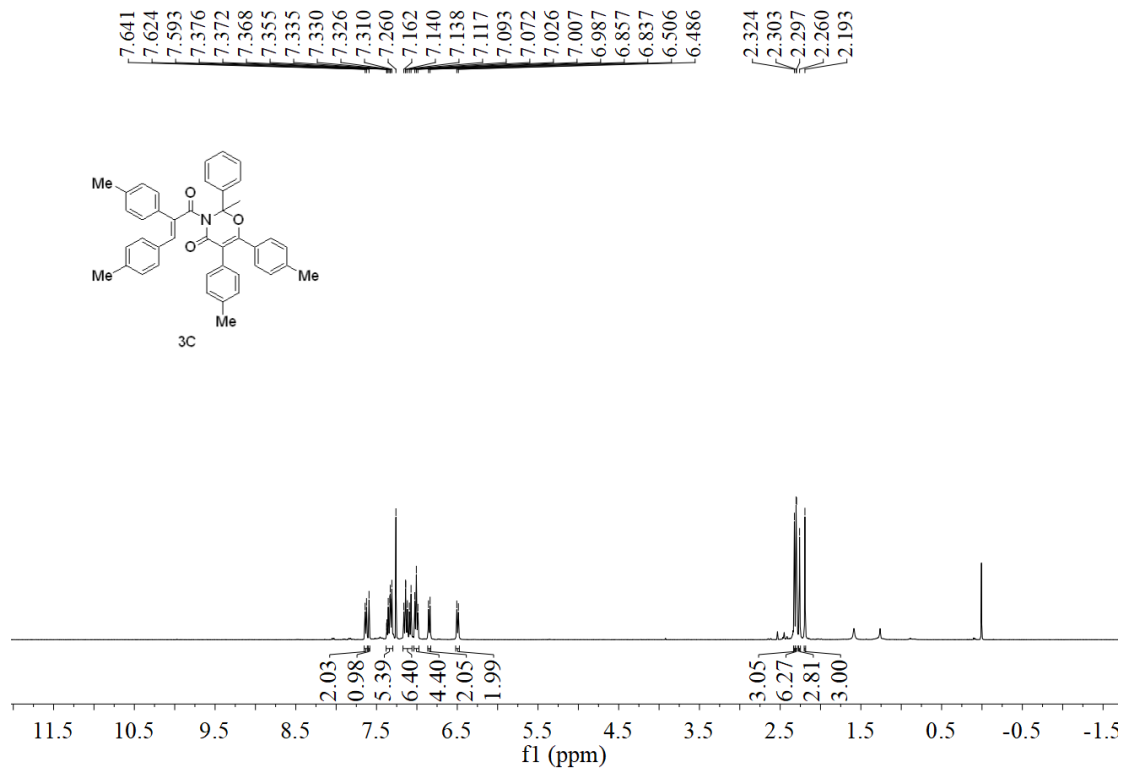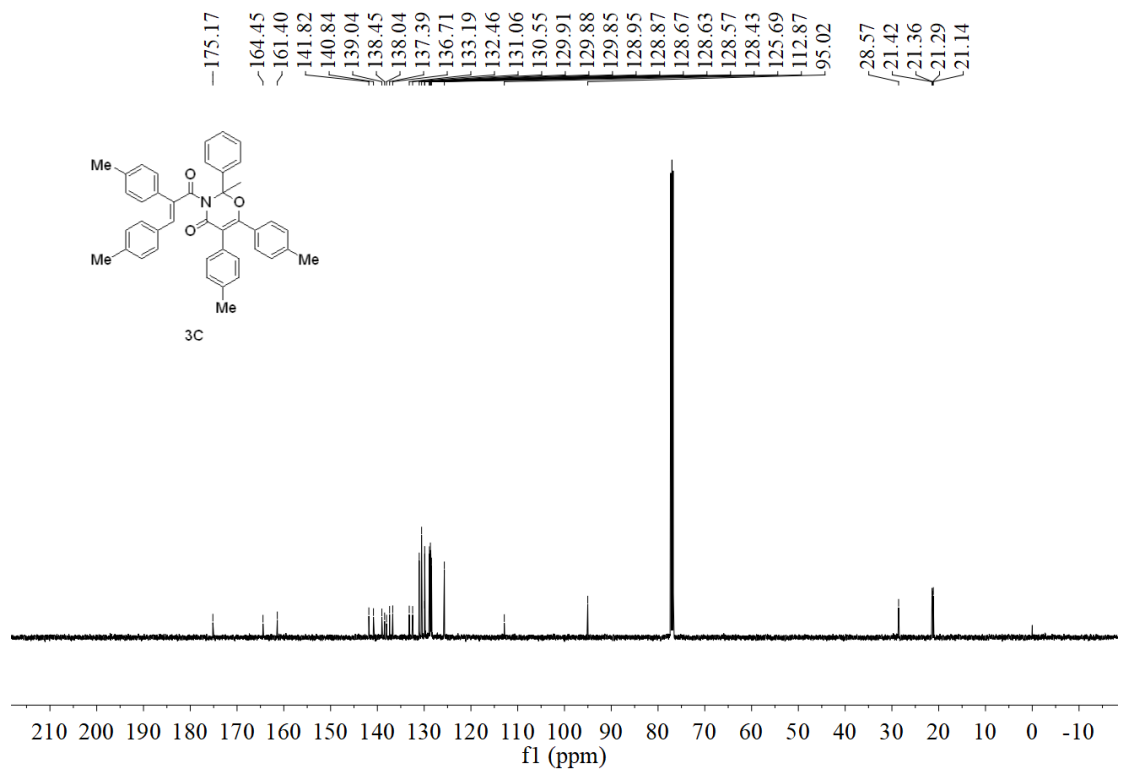

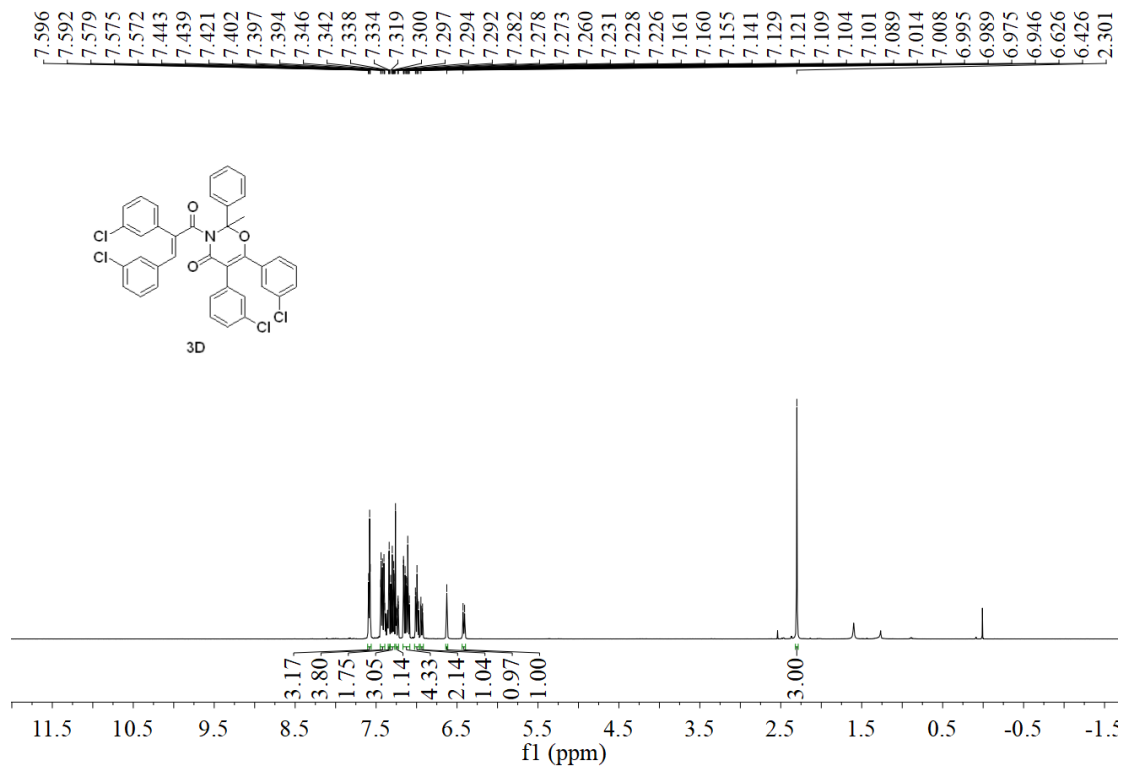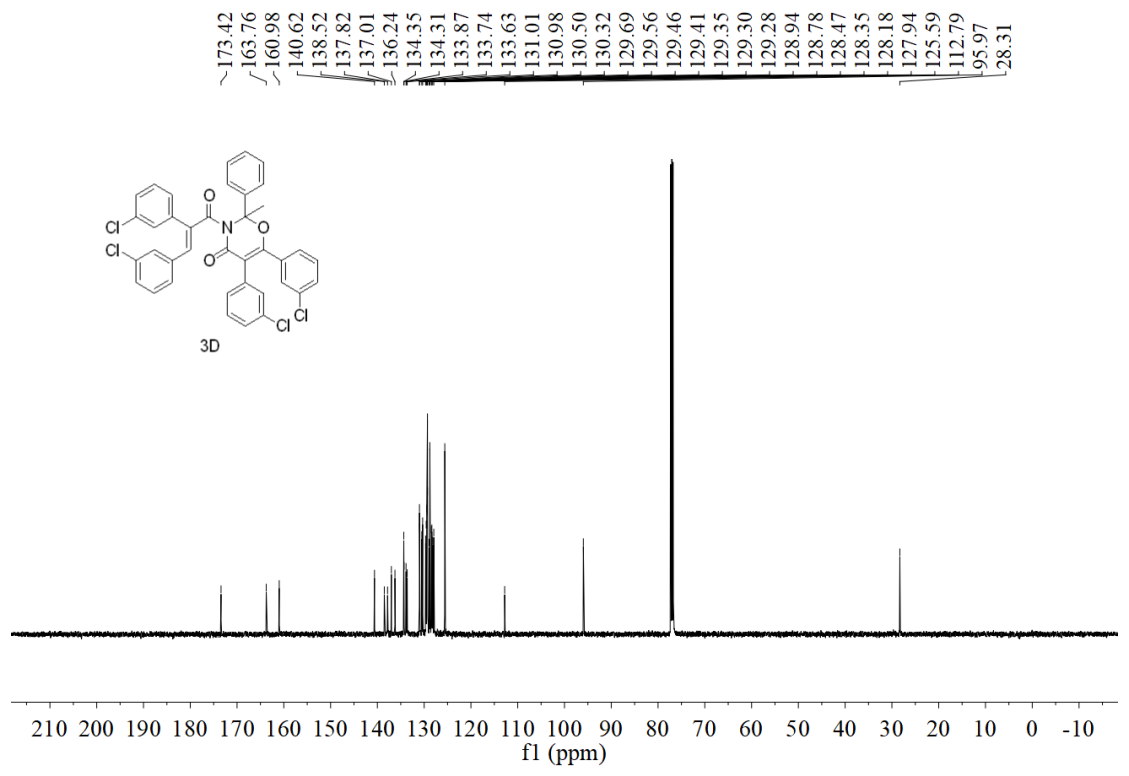

Supplement: d0ob00601g1.pdf [file d0ob00601g1.pdf]
